# Supplementary material for: Exposure to high-sugar diet induces transgenerational changes in sweet sensitivity and feeding behavior via H3K27me3 reprogramming
Source: eLife. 2023 Sep 12;12:e85365. doi: 10.7554/eLife.85365 (PMC10558205; doi:10.7554/eLife.85365)
Supplement: Figure 1—figure supplement 1—source data 1. [file elife-85365-fig1-figsupp1-data1.xlsx]

## Sheet: Figure1-S1-A
Figure1-Figure 1-figure supplement 1 A
5 flies/group			5 flies/group
ND	F0		ND	F1	F2
0.961535	1.20041		0.961535	1.20495	1.23487
1.04003	1.29117		1.04003	1.10626	1.05282
0.998438	1.21335		0.998438	1.23097	0.921531
1.04656	1.5199		1.04656	1.07434	1.04858
0.954352	1.38646		0.954352	1.15806	1.04171
0.999088	1.34611		0.999088	1.01743	1.08069
1.13391	1.67012		1.13391	1.03665	1.07538
0.979038	0.894516		0.979038	1.13821	0.924016
0.979076	1.58564		0.979076	1.29741	0.99125
0.895599	1.3312		0.895599	1.06588	1.1069
1.1113	1.52055		1.1113		0.796505
0.901077	1.37921		0.901077		1.11921

## Sheet: Figure1-S1-B
Figure1-Figure 1-figure supplement 1 B
5 flies/group			5 flies/group
ND	F0		ND	F1	F2	F3
15.088	38.9877		15.088	22.6558	24.181	19.2272
18.2304	51.8378		18.2304	27.4363	25.4576	16.7436
16.9394	29.5796		16.9394	26.2414	20.445	19.3574
18.9833	40.2136		18.9833	22.5088	21.2387	21.2983
25.586	39.4296		25.586	30.5077	31.4641	25.5798
25.223	38.9718		25.223	34.4648	31.1913	21.7455
23.745	36.2726		23.745	29.8234	21.1824	16.7227
25.8933			25.8933	28.7218	30.5647	20.3999
21.1993			21.1993	28.8902	31.0565	20.6273

## Sheet: Figure1-S1-C
Figure1-Figure 1-figure supplement 1 C
40-60 flies/group			40-60 flies/group
ND	F0		ND	F1	F2
0.830695	1.08853		0.91223	1.73469	1.62275
1.07859	1.56155		1.12993	1.15464	0.999091
1.09071	1.18425		1.19353	1.11573	0.756315
0.751939	1.79015		0.76431	1.00961	0.917681
1.17085	1.74051		1.03212	1.04102	0.923132
1.51989	1.61444		1.04675	1.15144	0.980209
0.657912	1.81536		0.921124	1.93276	0.943353
0.657124	0.970716		1.17085	1.8067	1.22836
1.02035	0.925016		1.51989	1.787	1.1283
0.973867	1.55299		0.657912	1.735	1.08102
	1.83585		0.657124		0.973079
			1.02035		1.33079
			0.973867		1.33001

## Sheet: Figure1-S1-D
Figure1-Figure 1-figure supplement 1 D
15 flies/group			15 flies/group
ND	F0		ND	F1	F2	F3
1.2054	0.512934		1.2054	0.935688	0.640194	1.49551
1.12292	0.392589		1.12292	0.599696	0.453851	0.745935
0.738786	0.41226		0.738786	0.390574	0.359629	0.755281
1.26006	0.285627		1.26006	0.612817	0.786902	1.50336
1.21704	0.466258		1.21704	0.353168	1.05145	1.29659
0.652082	0.420814		0.652082	0.766964	0.368153	1.15078
			1.0006
			1.39352
			0.717175

## Sheet: Figure1-S1-E
Figure1-Figure 1-figure supplement 1 E
15 flies/group			15 flies/group
ND	F0		ND	F1	F2	F3
0.910026	0.273055		0.910026	0.618184	0.859945	1.47266
1.01161	0.717911		1.01161	0.512872	0.660231	1.04908
1.08625	0.732001		1.08625	0.681111	0.412072	0.395298
1.19555	0.204294		1.19555	0.600701	0.53732	1.09111
0.895478	1.01851		0.895478	0.854604	0.909456	1.05367
0.934063	1.18088		0.934063	0.804112	0.610151	1.53523
			1.1883
			1.36349
			0.617191
