# Supplementary material for: Exposure to high-sugar diet induces transgenerational changes in sweet sensitivity and feeding behavior via H3K27me3 reprogramming
Source: eLife. 2023 Sep 12;12:e85365. doi: 10.7554/eLife.85365 (PMC10558205; doi:10.7554/eLife.85365)
Supplement: Figure 1—figure supplement 2—source data 1. [file elife-85365-fig1-figsupp2-data1.xlsx]

## Sheet: Figure1-S2-A
Figure1-Figure 1-figure supplement 2 A
20 flies/group
ND	F0
0.946855	1.68132
0.644312	2.02842
1.12647	1.11292
1.16209
1.12028

## Sheet: Figure1-S2-B
Figure1-Figure 1-figure supplement 2 B
20 flies/group
ND	F1	F2	F3
0.946855	1.09937	1.39271	1.37889
0.644312	1.1946	1.1915	1.28518
1.12647	1.12002	1.05757	0.667366
1.16209	1.16352	1.00492	1.23185
1.12028	1.16991	1.16209	0.60164
0.888557	1.7275	1.57709	1.53728
0.853798	1.46207	1.33821	1.15462
0.904672	1.8816	1.60732	1.10374
1.12144	2.56877	2.97723	0.519062
1.29176		2.35347	1.01748
0.949647			0.824306
0.946698			1.9686
0.646984			1.13545
1.22856			0.813983
1.16789

## Sheet: Figure1-S2-C
Figure1-Figure 1-figure supplement 2 C
8-12 flies/group
ND	sucrose	group1	group2	group3	group4		mean (%)	SEM (%)	number			group1	group2	group3	group4
	6.25	0	0.666667	0.3	0		24.1667	15.8333	4		a	-2.09537	-0.804116	-1.49985	-1.76177
	12.5	0.6	0.444444	0.65	0.454545		53.7247	5.17228	4		b	-0.122671	-0.037862	-0.123728	-0.093465
	25	0.8	0.777778	0.95	0.818182		83.649	3.87281	4		c	0.99197	0.978848	0.986967	0.98875
	50	1	0.777778	0.95	0.909091		90.9217	4.7593	4
	100	1	0.888889	0.95	1		95.9722	2.63889	4		y=0.5 (S50)	11.8126	13.6908	9.0919	13.7188
	200	1	1	1	1		100	0	4
	400	1	1	1	1		100	0	4
	800	1	1	1	1		100	0	4
	1000	1	1	1	1		100	0	4
F0	sucrose	group1	group2	group3			mean (%)	SEM (%)	number			group1	group2	group3
	6.25	0	0	0.0909091			3.0303	3.0303	3		a	-1.28793	-0.988406	-1.0631
	12.5	0.1	0.2	0.272727			19.0909	5.00688	3		b	-0.0296263	-0.0192661	-0.030474
	25	0.3	0.5	0.545455			44.8485	7.53931	3		c	1.01516	0.967367	0.992367
	50	0.8	0.6	0.727273			70.9091	5.84464	3
	100	1	0.7	0.909091			86.9697	8.88142	3		y=0.5 (S50)	30.929	38.8754	25.2583
	200	1	0.9	1			96.6667	3.33333	3
	400	1	1	1			100	0	3
	800	1	1	1			100	0	3
	1000	1	1	1			100	0	3

## Sheet: Figure1-S2-D
Figure1-figure supplement 2 D
8-12 flies/group
ND	sucrose	group1	group2	group3	group4		mean (%)	SEM (%)	number			group1	group2	group3	group4
	6.25	0	0.666667	0.3	0		24.1667	15.8333	4		a	-2.09537	-0.804116	-1.49985	-1.76177
	12.5	0.6	0.444444	0.65	0.454545		53.7247	5.17228	4		b	-0.122671	-0.037862	-0.123728	-0.093465
	25	0.8	0.777778	0.95	0.818182		83.649	3.87281	4		c	0.99197	0.978848	0.986967	0.98875
	50	1	0.777778	0.95	0.909091		90.9217	4.7593	4
	100	1	0.888889	0.95	1		95.9722	2.63889	4		y=0.5 (S50)	11.8126	13.6908	9.0919	13.7188
	200	1	1	1	1		100	0	4
	400	1	1	1	1		100	0	4
	800	1	1	1	1		100	0	4
	1000	1	1	1	1		100	0	4
F1	sucrose	group1	group2	group3	group4		mean (%)	SEM (%)	number			group1	group2	group3	group4
	6.25	0	0	0	0.111111		2.77778	2.77778	4		a	-1.23701	-1.15087	-1.14323	-0.935105
	12.5	0.2	0.1	0.0909091	0.444444		20.8838	8.23314	4		b	-0.0295603	-0.0181605	-0.0159154	-0.0309482
	25	0.3	0.2	0.181818	0.555556		30.9343	8.60844	4		c	1.01376	1.00645	1.0032	0.971895
	50	0.8	0.6	0.4	0.777778		64.4444	9.29622	4
	100	1	0.8	0.909091	0.777778		87.1717	5.14953	4		y=0.5 (S50)	29.7255	45.1996	51.5612	22.0983
	200	1	1	0.909091	1		97.7273	2.27273	4
	400	1	1	1	1		100	0	4
	800	1	1	1	1		100	0	4
	1000	1	1	1	1		100	0	4
F2	sucrose	group1	group2	group3	group4		mean (%)	SEM (%)	number			group1	group2	group3	group4
	6.25	0	0	0	0		0	0	4		a	-1.25428	-1.35321	-1.03509	-1.11633
	12.5	0	0.1	0.272727	0.111111		12.096	5.64217	4		b	-0.019475	-0.0408269	-0.0239764	-0.0156882
	25	0.1	0.5	0.454545	0.111111		29.1414	10.773	4		c	1.01591	0.994148	0.970254	0.991193
	50	0.6	0.9	0.636364	0.555556		67.298	7.74561	4
	100	0.9	0.9	0.818182	0.777778		84.899	3.05837	4		y=0.5 (S50)	45.6165	24.675	32.9062	52.3299
	200	1	1	0.909091	0.888889		94.9495	2.94493	4
	400	1	1	1	1		100	0	4
	800	1	1	1	1		100	0	4
	1000	1	1	1	1		100	0	4
F3	sucrose	group1	group2	group3	group4		mean (%)	SEM (%)	number			group1	group2	group3	group4
	6.25	0.1	0.1	0.0909091	0.125		10.3977	0.732786	4		a	-1.08546	-1.07336	-1.0882	-1.19502
	12.5	0.2	0.1	0.272727	0.25		20.5682	3.83624	4		b	-0.0209693	-0.0154024	-0.0285166	-0.043287
	25	0.3	0.3	0.454545	0.625		41.9886	7.74695	4		c	1.01781	1.01879	1.00882	1.0045
	50	0.6	0.4	0.727273	0.875		65.0568	10.0662	4
	100	1	0.9	1	1		97.5	2.5	4		y=0.5 (S50)	35.2968	47.2037	26.6579	19.9216
	200	1	1	1	1		100	0	4
	400	1	1	1	1		100	0	4
	800	1	1	1	1		100	0	4
	1000	1	1	1	1		100	0	4
F4	sucrose	group1	group2	group3	group4		mean (%)	SEM (%)	number			group1	group2	group3	group4
	6.25	0.2	0	0.363636	0.2		19.0909	7.44123	4		a	-0.830736	-0.995877	-0.739924	-0.943197
	12.5	0.5	0.3	0.545455	0.6		48.6364	6.53977	4		b	-0.0202619	-0.0154975	-0.029956	-0.046265
	25	0.5	0.3	0.636364	0.6		50.9091	7.54235	4		c	1.01147	1.00196	1.00447	0.981629
	50	0.6	0.6	0.818182	0.9		72.9545	7.66351	4
	100	1	0.7	1	0.9		90	7.07107	4		y=0.5 (S50)	23.9379	44.2075	12.7865	14.5272
	200	1	1	1	1		100	0	4
	400	1	1	1	1		100	0	4
	800	1	1	1	1		100	0	4
	1000	1	1	1	1		100	0	4
F5	sucrose	group1	group2	group3	group4		mean (%)	SEM (%)	number			group1	group2	group3	group4
	6.25	0.1	0.4	0.181818	0.125		20.1705	6.82788	4		a	-1.14479	-0.8127	-1.22503	-1.45848
	12.5	0.5	0.6	0.454545	0.375		48.2386	4.69487	4		b	-0.055804	-0.0487271	-0.0631362	-0.082406
	25	0.6	0.7	0.727273	0.875		72.5568	5.68286	4		c	0.959544	1.00656	1.00586	0.969665
	50	0.9	1	1	0.875		94.375	3.28744	4
	100	0.9	1	1	0.875		94.375	3.28744	4		y=0.5 (S50)	16.3561	9.70132	14.0087	13.7506
	200	0.9	1	1	1		97.5	2.5	4
	400	1	1	1	1		100	0	4
	800	1	1	1	1		100	0	4
	1000	1	1	1	1		100	0	4

## Sheet: Figure1-S2-E,F
Figure 1-figure supplement 2 E-F
1% Hexanoic acid
ND	F0	F1
1	1	1		5 flies/group
1	0	1			ND	F0	F1
0	0	1		group1	0.75	0.5	0.75
1	1	0		group2	0.5	0.5	0.25
0	0	1		group3	0.5	0.5	0.5
0	1	0		group4	0.75	0.75	0.75
1	0	0		group5	0.5	0.5	0.5
1	1	0		group6	0.5	0.5	0.5
0	1	0		group7	0.75	0.5	0.5
1	0	1		group8	0.5	0	0.5
0	0	0		group9			0.5
1	1	1
1	1	0		mean (%)	59.375	46.875	52.7778
1	1	1		SEM (%)	4.57453	7.37621	5.00771
0	0	1		number	8	8	9
1	1	1
0	0	1
1	1	0
0	0	0
1	1	1
1	0	1
0	0	1
0	1	0
1	1	0
1	0	1
1	1	0
1	0	0
0	1	1
0	0	0
1	0	0
1	0	1
0	0	1
1	1	1
1	0	1
0	0	1
1	1	0
0	0	1
0	1	0
1	0	0
1	1	0

## Sheet: Figure1-S2-G,H
Figure 1-figure supplement 2 G-H
male
ND	F0	F1
1	1	1		5 flies/group
1	0	0			ND	F0	F1
1	0	0		group1	0.8	0.4	0.4
0	1	1		group2	1	0.4	0.8
1	0	0		group3	0.8	0.6	0.6
1	1	1		group4	0.8	0.2	0.2
1	0	1		group5	1	0.4	0.6
1	0	0		group6	0.8	0.4	0.4
1	1	1
1	0	1
1	0	1
1	1	0
1	1	1		mean (%)	86.6667	40	50
0	1	0		SEM (%)	4.21637	5.16398	8.56349
1	0	1		number	6	6	6
1	0	0
1	0	0
1	1	1
1	0	0
0	0	0
1	0	1
1	0	0
1	0	1
1	1	1
1	1	0
1	0	0
1	0	1
0	0	1
1	1	0
1	1	0

## Sheet: Figure1-S2-I
Figure 1-figure supplement 2 I
8-12 flies/group
ND	sucrose	group1	group2	group3	group4	group5	group6	group7		mean (%)	SEM (%)	number		WT	F2	Maternal-F2	Paternal-F2
	50	0.105263	0.4	0.3125	0.375	0.3	0.166667	0.222222		26.8807	4.10343	7		159.316	205.88	337.71	174.614
	100	0.263158	0.5	0.5625	0.5625	0.4	0.333333	0.388889		43.0054	4.35844	7		120.912	360.55	289.84	170.526
	200	0.578947	0.6	0.875	0.75	0.5	0.666667	0.777778		67.8342	4.91973	7		81.976	318.024	200.74	74.6765
	400	0.947368	0.7	1	0.75	0.7	0.75	0.833333		81.1529	4.54863	7		86.6586	342.151
	800	1	1	1	0.9375	1	0.833333	0.944444		95.9325	2.34975	7		189.606	319.609
	1000	1	1	1	1	1	1	1		100	0	7		151.496
														117.525
maternal F2	sucrose	group1	group2	group3	group4	group5	group6	group7		mean (%)	SEM (%)	number
	50	0.133333	0	0						4.44444	4.44444	3
	100	0.133333	0.125	0.333333						19.7222	6.80981	3
	200	0.333333	0.4375	0.555556						44.213	6.41918	3
	400	0.6	0.5625	0.666667						60.9722	3.04607	3
	800	0.733333	1	1						91.1111	8.88889	3
	1000	0.866667	1	1						95.5556	4.44444	3
paternal F2	sucrose	group1	group2	group3	group4	group5	group6	group7		mean (%)	SEM (%)	number
	50	0.2	0.166667	0.25						20.5556	2.42161	3
	100	0.4	0.25	0.6875						44.5833	12.8358	3
	200	0.5	0.583333	0.875						65.2778	11.3685	3
	400	0.8	0.833333	0.9375						85.6944	4.14113	3
	800	0.8	0.833333	1						87.7778	6.1864	3
	1000	1	1	1						100	0	3
F2	sucrose	group1	group2	group3	group4	group5	group6	group7		mean (%)	SEM (%)	number
	50	0	0.0625	0	0.1	0	0			2.70833	1.78	6
	100	0	0.1875	0.105263	0.3	0	0.111111			11.7312	4.69074	6
	200	0.375	0.5	0.368421	0.5	0.5	0.333333			42.9459	3.20727	6
	400	0.625	0.625	0.684211	0.7	0.666667	0.666667			66.1257	1.25373	6
	800	0.875	0.875	0.894737	0.9	0.916667	0.888889			89.1715	0.649905	6
	1000	1	0.9375	1	0.9	1	1			97.2917	1.78	6
