# Supplementary material for: Exposure to high-sugar diet induces transgenerational changes in sweet sensitivity and feeding behavior via H3K27me3 reprogramming
Source: eLife. 2023 Sep 12;12:e85365. doi: 10.7554/eLife.85365 (PMC10558205; doi:10.7554/eLife.85365)
Supplement: Figure 1—source data 1. [file elife-85365-fig1-data1.xlsx]

## Sheet: Figure1-B
Figure1 B
5 flies/group
ND	F0
1.34	1.08
1.32	1.18
1.38	1.06
1.34	1.04
1.36	1.16
1.36	1.1
1.34
1.3
1.36

## Sheet: Figure1-C
Figure1 C
5 flies/group
NF	F1	F2	F3
1.34	1.28	1.28	1.36
1.32	1.34	1.32	1.4
1.38	1.22	1.22	1.38
1.34	1.18	1.28	1.34
1.36	1.36	1.32	1.32
1.36	1.26	1.2	1.4
1.34	1.31	1.1	1.36
1.3	1.22	1.16	1.38
1.36	1.27	1.24	1.32

## Sheet: Figure1-D
Figure1 D
1 flies/group
ND	F0
0.150175	0.10744
0.261263	0.016217
0.26332	0.170282
0.230405	0.044598
0.181033	0.034462
0.088459	0.137847
0.139889	0.129738
0.195433	0.174336
0.164575	0.018244
0.170747	0.172309
0.220119	0.158119
	0.123657

## Sheet: Figure1-E
Figure1 E
1 flies/group
WT	F1	F2	F3	F4	F5
0.150175	0.092574	0.139889	0.011626	0.149196	0.193761
0.261263	0.104917	0.109031	0.189886	0.151134	0.224763
0.26332	0.055544	0.191319	0.106568	0.13757	0.122069
0.230405	0.273606	0.092574	0.077504	0.141445	0.368146
0.181033	0.100802	0.008229	0.058128	0.22399	0.172447
0.088459	0.133717	0.218062	0.098818	0.062003	0.156946
0.139889	0.111088	0.06583	0.085255	0.075567	0.168572
0.195433	0.119317	0.137832	0.09688	0.102693	0.168572
0.164575	0.125489	0.092574	0.091068	0.063941	0.135633
0.170747	0.086402	0.059659	0.063941	0.087192	0.302267
0.220119	0.05143	0.074059
	0.045258	0.078173

## Sheet: Figure1-G
Figure1 G
8-12 flies/group
WT	sucrose	group1	group2	group3	group4	group5	group6	group7		mean (%)	SEM (%)	number			group1	group2	group3	group4	group5	group6	group7
	50	0.105263	0.4	0.3125	0.375	0.227273	0.185185	0.25		26.5032	3.9676	7		a	-1.24783	-0.865053	-1.17782	-0.67763	-0.96034	-1.0289	-0.903703
	100	0.263158	0.5	0.5625	0.5625	0.318182	0.333333	0.416667		42.2334	4.61527	7		b	-0.00541287	-0.00145888	-0.0102535	-0.0042909	-0.00409921	-0.0060405	-0.00308218
	200	0.578947	0.6	0.875	0.75	0.636364	0.703704	0.583333		67.5335	4.11718	7		c	1.02679	1.22516	1.0082	0.9672	0.998384	0.936975	1.05135
	400	0.947368	0.7	1	0.75	0.772727	0.777778	0.75		81.3982	4.27024	7
	800	1	1	1	0.9375	0.954545	0.888889	1		96.8705	1.65201	7		y=0.5 (S50)	159.316	120.912	81.976	86.6586	160.011	141.771	160.318
	1000	1	1	1	1	1	1	1		100	0	7
P1	sucrose	group1	group2	group3	group4	group5	group6	group7		mean (%)	SEM (%)	number			group1	group2	group3	group4	group5	group6	group7
	50	0.1	0.1	0	0	0	0.166667	0		5.2381	2.6082	7		a	-1.09839	-1.25914	-1.35255	-1.2225	-88.1493	-99.6567	-59.7453
	100	0.4	0.2	0	0.2	0	0.166667	0		13.8095	5.65445	7		b	-0.00433228	-0.00349766	-0.0017755	-0.00370473	-8.91e-06	-7.03e-06	-1.34e-05
	200	0.5	0.2	0.3	0.5	0	0.166667	0.166667		26.1905	6.99314	7		c	0.966898	1.04692	1.24419	1.03558	88.0826	99.7606	59.7146
	400	0.7	0.8	0.6	0.7	0.2	0.333333	0.333333		52.381	8.75034	7
	800	0.9	0.9	0.8	1	0.5	0.666667	0.5		75.2381	7.58923	7		y=0.5 (S50)	197.468	238.411	336.494	222.77	723.706	566.82	664.234
	1000	0.9	1	1	1	0.8	0.833333	0.833333		90.9524	3.38955	7

## Sheet: Figure1-H
Figure1 H
8-12 flies/group
WT	sucrose	group1	group2	group3	group4	group5	group6	group7		mean (%)	SEM (%)	number			group1	group2	group3	group4	group5	group6	group7
	50	0.105263	0.4	0.3125	0.375	0.227273	0.185185	0.25		26.5032	3.9676	7		a	-1.24783	-0.865053	-1.17782	-0.67763	-0.96034	-1.0289	-0.903703
	100	0.263158	0.5	0.5625	0.5625	0.318182	0.333333	0.416667		42.2334	4.61527	7		b	-0.00541287	-0.00145888	-0.0102535	-0.0042909	-0.00409921	-0.0060405	-0.00308218
	200	0.578947	0.6	0.875	0.75	0.636364	0.703704	0.583333		67.5335	4.11718	7		c	1.02679	1.22516	1.0082	0.9672	0.998384	0.936975	1.05135
	400	0.947368	0.7	1	0.75	0.772727	0.777778	0.75		81.3982	4.27024	7
	800	1	1	1	0.9375	0.954545	0.888889	1		96.8705	1.65201	7		y=0.5 (S50)	159.316	120.912	81.976	86.6586	160.011	141.771	160.318
	1000	1	1	1	1	1	1	1		100	0	7
F1	sucrose	group1	group2	group3	group4	group5	group6	group7		mean (%)	SEM (%)	number			group1	group2	group3	group4	group5	group6	group7
	50	0	0	0.153846	0.111111	0.0625	0.111111	0.1		7.69383	2.22698	7		a	-1.23813	-1.32073	-1.18702	-1.12353	-1.30406	-4.53357	-1.49257
	100	0.105263	0.1	0.153846	0.222222	0.1875	0.111111	0.2		15.4278	1.89125	7		b	-0.00280301	-0.00262246	-0.00221588	-0.0014989	-0.00135064	-0.00022642	-0.00113189
	200	0.421053	0.3	0.384615	0.444444	0.3125	0.333333	0.2		34.2278	3.14086	7		c	1.0723	1.12947	1.16344	1.19329	1.30521	4.59395	1.49455
	400	0.631579	0.7	0.692308	0.555556	0.5625	0.444444	0.6		59.8055	3.34773	7
	800	0.947368	1	1	0.777778	0.8125	0.777778	0.9		88.7918	3.74022	7		y=0.5 (S50)	275.308	282.586	262.544	322.09	356.963	450.489	358.66
	1000	1	1	1	1	1	1	1		100	0	7
F2	sucrose	group1	group2	group3	group4	group5	group6	group7		mean (%)	SEM (%)	number			group1	group2	group3	group4	group5	group6	group7
	50	0.157895	0	0	0	0.0625	0	0		3.1485	2.28337	7		a	-1.05824	-1.93237	-1.5494	-1.26583	-1.04176	-1.22596	-0.992914
	100	0.210526	0	0.0909091	0	0.1875	0.105263	0		8.48855	3.3941	7		b	-0.00241637	-0.000759761	-0.00130812	-0.00264796	-0.0034205	-0.00296251	-0.00470726
	200	0.526316	0.166667	0.181818	0.375	0.5	0.368421	0.4		35.9746	5.30685	7		c	1.09089	1.8378	1.4353	1.06355	0.949642	1.04202	0.729187
	400	0.631579	0.5	0.545455	0.625	0.625	0.684211	0.6		60.1606	2.30402	7
	800	0.947368	0.666667	0.909091	0.875	0.875	0.894737	0.6		82.398	5.06143	7		y=0.5 (S50)	241.157	484.001	385.859	305.604	245.641	275.502	311.456
	1000	1	1	1	1	0.9375	1	0.8		96.25	2.84783	7
F3	sucrose	group1	group2	group3	group4	group5	group6	group7		mean (%)	SEM (%)	number			group1	group2	group3	group4	group5	group6	group7
	50	0	0.181818	0	0	0	0	0		2.5974	2.5974	7		a	-1.22216	-1.11382	-0.981569	-1.33511	-1.21179	-1.17566	-1.169
	100	0.166667	0.181818	0.166667	0.166667	0.2	0	0		12.5974	3.28434	7		b	-0.00245525	-0.00260983	-0.00368097	-0.00279312	-0.0051258	-0.00279489	-0.00388746
	200	0.388889	0.454545	0.5	0.166667	0.6	0.166667	0.2		35.3824	6.67372	7		c	1.10503	1.109	0.850137	1.12711	0.946926	0.944243	0.869198
	400	0.611111	0.727273	0.5	0.833333	0.7	0.666667	0.8		69.1198	4.28151	7
	800	0.944444	1	0.833333	1	0.9	0.833333	0.8		90.1587	3.11855	7		y=0.5 (S50)	286.365	231.331	280.042	270.538	194.596	348.211	296.486
	1000	1	1	0.833333	1	1	0.833333	0.8		92.381	3.61612	7
F4	sucrose	group1	group2	group3	group4	group5	group6	group7		mean (%)	SEM (%)	number			group1	group2	group3	group4	group5	group6	group7
	50	0	0.142857	0	0.0714286	0	0	0		3.06122	2.12415	7		a	-1.35549	-1.35549	-1.24282	-1.24282	-1.17989	-1.24114	-9.1433
	100	0.0909091	0.142857	0.166667	0.285714	0.3	0	0		14.0878	4.60736	7		b	-0.00473084	-0.00473084	-0.00633228	-0.00633228	-0.00304836	-0.00470725	-0.000144294
	200	0.545455	0.285714	0.25	0.642857	0.4	0.5	0		37.4861	8.18352	7		c	1.02373	1.109	1.02373	0.968342	1.07196	0.911485	8.99967
	400	0.818182	0.428571	0.583333	0.857143	0.7	0.75	0.333333		63.8652	7.50468	7
	800	1	0.857143	0.916667	0.928571	1	0.75	1		92.1769	3.5225	7		y=0.5 (S50)	201.01	169.124	136.47	154.121	237.539	234.535	505.868
	1000	1	1	1	1	1	1	1		100	0	7
F5	sucrose	group1	group2	group3	group4	group5	group6	group7		mean (%)	SEM (%)	number			group1	group2	group3	group4	group5	group6	group7
	50	0.421053	0.1	0.0714286	0.166667	0	0.166667	0.194444		16.0037	5.03485	7		a	-0.814797	-1.60261	-1.31756	-1.36587	-1.35922	-1.18401	-1.25967
	100	0.578947	0.6	0.285714	0.5	0.333333	0.5	0.583333		48.3047	4.75248	7		b	-0.00663954	-0.0149341	-0.0068478	-0.00977331	-0.00584106	-0.00726746	-0.0108799
	200	0.789474	0.7	0.714286	0.8	0.5	0.666667	0.777778		70.6886	3.93513	7		c	1.0032	0.884069	0.992573	1.00666	1.02948	1.01248	0.950639
	400	0.947368	0.8	0.857143	1	1	1	0.833333		91.9692	3.30261	7
	800	1	0.9	1	1	1	1	1		98.5714	1.42857	7		y=0.5 (S50)	72.5884	95.6582	143.68	101.47	161.405	115.226	94.4805
	1000	1	1	1	1	1	1	1		100	0	7

## Sheet: Figure1-I
Figure1 I
8-12 flies/group
WT	sucrose	group1	group2	group3	group4	group5	group6	group7		mean (%)	SEM (%)	number			group1	group2	group3	group4	group5	group6	group7
	50	0.105263	0.4	0.3125	0.375	0.227273	0.185185	0.25		26.5032	3.9676	7		a	-1.24783	-0.865053	-1.17782	-0.67763	-0.96034	-1.0289	-0.903703
	100	0.263158	0.5	0.5625	0.5625	0.318182	0.333333	0.416667		42.2334	4.61527	7		b	-0.00541287	-0.00145888	-0.0102535	-0.0042909	-0.00409921	-0.0060405	-0.00308218
	200	0.578947	0.6	0.875	0.75	0.636364	0.703704	0.583333		67.5335	4.11718	7		c	1.02679	1.22516	1.0082	0.9672	0.998384	0.936975	1.05135
	400	0.947368	0.7	1	0.75	0.772727	0.777778	0.75		81.3982	4.27024	7
	800	1	1	1	0.9375	0.954545	0.888889	1		96.8705	1.65201	7		y=0.5 (S50)	159.316	120.912	81.976	86.6586	160.011	141.771	160.318
	1000	1	1	1	1	1	1	1		100	0	7
F1	sucrose	group1	group2	group3	group4	group5	group6	group7		mean (%)	SEM (%)	number			group1	group2	group3	group4	group5	group6	group7
	50	0	0	0.153846	0.111111	0.0625	0.111111	0.1		7.69383	2.22698	7		a	-1.23813	-1.32073	-1.18702	-1.12353	-1.30406	-4.53357	-1.49257
	100	0.105263	0.1	0.153846	0.222222	0.1875	0.111111	0.2		15.4278	1.89125	7		b	-0.00280301	-0.00262246	-0.00221588	-0.0014989	-0.00135064	-0.00022642	-0.00113189
	200	0.421053	0.3	0.384615	0.444444	0.3125	0.333333	0.2		34.2278	3.14086	7		c	1.0723	1.12947	1.16344	1.19329	1.30521	4.59395	1.49455
	400	0.631579	0.7	0.692308	0.555556	0.5625	0.444444	0.6		59.8055	3.34773	7
	800	0.947368	1	1	0.777778	0.8125	0.777778	0.9		88.7918	3.74022	7		y=0.5 (S50)	275.308	282.586	262.544	322.09	356.963	450.489	358.66
	1000	1	1	1	1	1	1	1		100	0	7
maternal F1	sucrose	group1	group2	group3	group4	group5	group6			mean (%)	SEM (%)	number			group1	group2	group3	group4	group5	group6
	50	0.0555556	0.0625	0.0625	0	0	0			3.00926	1.34976	6		a	-1.15736	-1.43894	-1.2344	-1.04448	-0.94799	-5.08463
	100	0.222222	0.1875	0.0625	0	0	0.1			9.53704	3.82414	6		b	-0.00253337	-0.00105304	-0.00242481	-0.00219053	-0.0028	-0.0002262
	200	0.388889	0.375	0.25	0.222222	0.3	0.2			28.9352	3.23498	6		c	1.09294	1.47157	1.08571	0.900682	0.791534	5.05018
	400	0.666667	0.5	0.6875	0.555556	0.5	0.4			55.162	4.47335	6
	800	0.944444	0.8125	0.9375	0.555556	0.6	0.8			77.5	6.73126	6		y=0.5 (S50)	264.001	372.963	307.456	437.387	420.892	490.957
	1000	1	1	0.9375	0.888889	0.8	1			93.7731	3.31601	6
Paternal F1	sucrose	group1	group2	group3	group4	group5	group6			mean (%)	SEM (%)	number			group1	group2	group3	group4	group5	group6
	50	0.142857	0.230769	0.294118	0.166667	0.142857	0.375			22.5378	3.83872	6		a	-0.955528	-0.921555	-0.967196	-1.18401	-0.954908	-0.843139
	100	0.428571	0.461538	0.352941	0.5	0.428571	0.5625			45.5687	2.91171	6		b	-0.0056373	-0.0048117	-0.00198137	-0.00726746	-0.00562378	-0.00691403
	200	0.642857	0.692308	0.411765	0.666667	0.642857	0.75			63.4409	4.74227	6		c	0.912316	0.993592	1.14236	1.01248	0.912594	0.975046
	400	0.714286	0.769231	0.764706	1	0.714286	0.9375			81.6668	4.97077	6
	800	0.857143	1	0.941176	1	0.857143	0.9375			93.216	2.61849	6		y=0.5 (S50)	149.091	129.757	206.548	115.226	149.215	82.979
	1000	1	1	1	1	1	1			100	0	6
