# Supplementary material for: Exposure to high-sugar diet induces transgenerational changes in sweet sensitivity and feeding behavior via H3K27me3 reprogramming
Source: eLife. 2023 Sep 12;12:e85365. doi: 10.7554/eLife.85365 (PMC10558205; doi:10.7554/eLife.85365)
Supplement: Figure 2—figure supplement 1—source data 1. [file elife-85365-fig2-figsupp1-data1.xlsx]

## Sheet: Figure 2-S1 B
Figure 2—figure supplement 1 B
			Area	Mean	Min	Max	IntDen	RawIntDen
H3	ND	1	0.01	65496.9	65376	65531	654.969	58947179
		2	0.008	65503.5	65387	65532	530.578	47752061
		3	0.006	65473	65366	65533	368.104	33129339
	F1	4	0.009	65494.3	65373	65533	587.994	52919432
		5	0.007	65480.8	65367	65533	429.99	38699129					250 embryos/group
		6	0.004	65417.1	65357	65485	268.21	24138926	H3K27me3/H3	average ND			ND	F1
H3K27me3	ND	7	0.008	65482.7	65327	65535	521.679	46951082	0.796494	0.982421	0.810746		0.810746	1.80809
		8	0.008	65458.5	65351	65524	493.121	44380863	0.929403		0.946033		0.946033	1.77692
		9	0.007	65474.3	65345	65523	449.59	40463111	1.22137		1.24322		1.24322	2.41557
	F1	10	0.016	65460.6	65349	65507	1044.46	94001384	1.77631		1.80809
		11	0.011	65461.6	65347	65518	750.626	67556384	1.74568		1.77692
		12	0.01	65467.6	65325	65535	636.49	57284107	2.3731		2.41557

## Sheet: Figure 2-S1 C
Figure 2—figure supplement 1 C

## Sheet: Figure 2-S1 D
Figure 2—figure supplement 1 D
			Area	Mean	Min	Max	IntDen	RawIntDen
H3	ND	45	625	65454	65393	65470	40908759	40908759
	F0	44	756	65472.8	65401	65493	49497404	49497404						20 flies/group
	F1	43	606	65482.2	65417	65512	39682239	39682239	H3K27me3/H3	average ND				ND	F0	F1
H3K27me3	ND	40	0.007	65431	65341	65535	459.471	41352400	45947100		1.12316	1		1	1.5248	1.229
	F0	41	0.013	65486.7	65383	65511	847.689	76292044	84768900		1.71259	1.5248		0.927562	1.53172	1.705
	F1	42	0.008	65469.4	65358	65520	547.76	49298438	54776000		1.38037	1.229		1.07244	1.5058	1.39387
H3K27me3	ND	7	0.003	65395.8	65289	65486	220.893	19880325	0.668898	0.721136	0.927562
	ND	8	0.004	65436.3	65288	65535	248.658	22379231	0.773373		1.07244
	F0	9	0.006	65464.9	65283	65535	392.062	35285597	1.10458		1.53172
	F0	10	0.006	65481.1	65314	65535	423.444	38109989	1.08588		1.5058
	F1	11	0.013	65505.2	65309	65533	839.923	75593046	1.22953		1.705
	F1	12	0.01	65513.2	65322	65535	656.588	59092942	1.00517		1.39387
H3	ND	13	0.005	65464.9	65331	65535	330.234	29721046
	ND	14	0.005	65468.6	65321	65534	321.524	28937119
	F0	15	0.005	65460.6	65324	65531	354.942	31944775
	F0	16	0.006	65477.2	65328	65528	389.953	35095759
	F1	17	0.01	65475.1	65333	65510	683.123	61481078
	F1	18	0.01	65466.6	65334	65516	653.211	58788990

## Sheet: Figure 2-S1 E
Figure 2—figure supplement 1 E
			Area	Mean	Min	Max	IntDen	RawIntDen
H3	ND	1	0.007	65511.6	65376	65535	459.309	41337832
	F0	2	0.006	65521.5	65403	65531	382.937	34464298
	ND	3	0.006	65508.3	65383	65530	380.676	34260857
	F0	4	0.006	65512.3	65375	65525	418.551	37669564
	ND	5	0.005	65508.6	65405	65524	358.842	32295749					20 flies/group
	F0	6	0.006	65517.1	65386	65532	421.493	37934377	H3K27me3/H3	average ND			ND	F1
H3K27me3	ND	7	0.005	65428.5	65343	65535	300.971	27087382	0.655269	0.748706	0.875202		0.875202	1.41557
	F0	8	0.006	65460.2	65341	65534	405.854	36526818	1.05985		1.41557		1.10513	1.78993
	ND	9	0.005	65468.8	65365	65524	314.978	28348009	0.827418		1.10513		1.01967	1.59978
	F0	10	0.009	65476.1	65358	65511	560.912	50482088	1.34013		1.78993
	ND	11	0.004	65399.5	65350	65453	273.951	24655598	0.763431		1.01967
	F0	12	0.008	65470.4	65358	65517	504.85	45436488	1.19777		1.59978
