# Supplementary material for: Exposure to high-sugar diet induces transgenerational changes in sweet sensitivity and feeding behavior via H3K27me3 reprogramming
Source: eLife. 2023 Sep 12;12:e85365. doi: 10.7554/eLife.85365 (PMC10558205; doi:10.7554/eLife.85365)
Supplement: Figure 2—figure supplement 2—source data 1. [file elife-85365-fig2-figsupp2-data1.xlsx]

## Sheet: Figure 2-S2 B
Figure 2—figure supplement 2 B
3 flies/group
ND	F1	F2
0.79559	1.72302	1.52089
0.861858	1.38796	0.99632
1.4584	1.36137	1.34061
0.916284	1.35588	1.69535
0.871033	1.31439	1.73911
1.25296	1.62574	1.74976
0.898829
1.16118
0.958131

## Sheet: Figure 2-S2 C
Figure 2—figure supplement 2 C
E(z)				Esc				Su(var)3-9				Caf-1
3 flies/group				3 flies/group				3 flies/group				3 flies/group
ND	F1	F2		ND	F1	F2		ND	F1	F2		ND	F1	F2
0.811528	1.6359	1.25993		1.05065	1.26337	1.04685		0.88	2	0.99		1.04	1.4	1.61
0.991764	1.59301	1.00902		1.29414	1.33514	1.06269		1.02	2.19	0.96		1.26	1.92	0.95
1.24248	1.08617	1.17767		0.735467	1.52166			1.11	1.25	1.11		0.77	1.58	1.51
0.679119	1.19398	1.0213		0.819879	1.2112	0.975882						0.882356	0.887848	0.902899
1.07584	1.0168	1.42102		0.78949	1.59755	0.969988						0.949827	0.820008	0.792298
1.36869	1.45183	0.860633		1.54491	1.47755	0.72455						1.1932	1.13261
0.724867	1.80552	0.906809
1.53713	0.798521
1.11123	1.41264

## Sheet: Figure 2-S2 D-G
Figure 2—figure supplement 2 D-G
D			E			F			G
3 flies/group			3 flies/group			15 flies/group			15 flies/group
NF	F0		NF	F0		NF	F0		NF	F0
0.79559	0.689015		0.811528	0.625079		0.825346	1.26957		0.799421	1.05286
0.861858	1.09624		0.991764	1.17261		1.17371	1.03097		1.08923	1.35899
1.4584	0.645615		1.24248	0.815118		1.0323	1.09277		1.02879	1.43641
0.916284	0.727317		0.679119	0.807617					1.0156	0.731535
0.871033	0.763961		1.07584	0.884437					0.963499	0.9196
1.25296	0.763454		1.36869	0.911241					1.14079	1.09704

## Sheet: Figure 2-S2 H
Figure 2—figure supplement 2 H
Utx			Cbp
3 flies/group			3 flies/group
NF	F0		NF	F0
0.809244	0.507448		0.89655	0.397674
0.911927	0.89898		0.982951	0.824695
1.35507	0.517916		1.13473	0.32779
0.90748	0.746535		0.854934	0.553377
1.01024	1.1468		0.887082	0.716086
1.09078	0.823752		1.31857	0.551651
1.02693	0.320157
0.987903	1.01561
0.985704
