# Supplementary material for: Exposure to high-sugar diet induces transgenerational changes in sweet sensitivity and feeding behavior via H3K27me3 reprogramming
Source: eLife. 2023 Sep 12;12:e85365. doi: 10.7554/eLife.85365 (PMC10558205; doi:10.7554/eLife.85365)
Supplement: Figure 3—figure supplement 1—source data 1. [file elife-85365-fig3-figsupp1-data1.xlsx]

## Sheet: Figure3-S1-B
Figure 3 —figure supplement 1 B
8-12 flies/group
NF
nos>+		0.01	0.03	0.05	0.1	0.2	0.3	0.4
	1	0	0.142857	0.214286	0.857143	1	1	1
	2	0	0.1875	0.5	0.8125	1	1	1
	3	0.166667	0.416667	0.583333	1	1	1	1
	4	0.0833333	0.333333	0.416667	0.916667	1	1	1
	5
	average	6.25	27.0089	42.8571	89.6577	100	100	100
	SEM	3.98928	6.357	7.91167	4.05421	0	0	0
	NUM	4	4	4	4	4	4	4
			1	2	3	4
		a	-1.28911	-1.25079	-1.09288	-1.11756
		b	-0.132028	-0.167525	-0.212594	-0.16761
		c	1.04928	1.02052	1.02191	1.004
		y=0.5	6.46147	5.23325	3.4765	4.75107
HS
nos>+		0.01	0.03	0.05	0.1	0.2	0.3	0.4
	1	0	0	0.0909091	0.454545	0.909091	1	1
	2	0	0.0909091	0.0909091	0.272727	0.818182	1	1
	3	0	0	0	0.181818	0.727273	0.909091	1
	4	0	0.0666667	0.133333	0.6	0.866667	0.933333	1
	5
	average	0	3.93939	7.87879	37.7273	83.0303	96.0606	100
	SEM	0	2.32762	2.81019	9.34125	3.90427	2.32762	0
	NUM	4	4	4	4	4	4	4
			1	2	3	4
		a	-1.34688	-1.45367	-1.77115	-1.22599
		b	-0.067395	-0.0426951	-0.0282264	-0.08404
		c	1.15445	1.33621	1.62574	1.05482
		r	0.970074	0.965333	0.964009	0.975914
		y=0.5	10.7092	12.9515	16.0556	9.43435
NF		0.01	0.03	0.05	0.1	0.2	0.3	0.4
NOS>EZ	1	0.111111	0.111111	0.333333	0.666667	0.888889	1	1
	2	0.0714286	0.142857	0.357143	0.642857	0.785714	0.928571	1
	3	0	0	0.166667	0.5	1	1	1
	4	0	0.0666667	0.4	0.8	1	1	1
	5
	average	4.56349	8.01587	31.4286	65.2381	91.8651	98.2143	100
	SEM	2.75644	3.09524	5.11027	6.14452	5.14727	1.78571	0
	NUM	4	4	4	4	4	4	4
			1	2	3	4
		a	-1.11473	-1.04923	-1.32529	-1.28859
		b	-0.093699	-0.09284	-0.081345	-0.142988
		c	1.05238	1.00105	1.11769	1.03674
		y=0.5	7.49348	7.96099	9.38475	6.12488
HS
NOS>EZ		0.01	0.03	0.05	0.1	0.2	0.3	0.4
	1	0.1	0.1	0.3	0.5	0.9	0.9	1
	2	0	0.333333	0.533333	0.8	0.933333	1	1
	3	0	0	0.272727	0.727273	1	1	1
	4	0.0769231	0.307692	0.461538	0.769231	1	1	1
	5
	average	4.42308	18.5256	39.19	69.9126	95.8333	97.5	100
	SEM	2.59675	8.08836	6.29157	6.8028	2.5	2.5	0
	NUM	4	4	4	4	4	4	4
			1	2	3	4	5
		a	-1.10807	-1.18202	-1.30981	-1.10494
		b	-0.072698	-0.189206	-0.116522	-0.144277
		c	1.0674	0.988143	1.05837	1.02378
		y=0.5	9.2066	4.67413	7.31727	5.17387
>EZ		0.01	0.03	0.05	0.1	0.2	0.3	0.4
NF	1	0.111111	0.222222	0.777778	1	1	1	1
	2	0	0.0909091	0.363636	0.909091	1	1	1
	3	0	0	0.363636	0.727273	0.909091	1	1
	4	0.111111	0.555556	0.777778	0.888889	0.888889	0.888889	1
	5
	average	5.55556	21.7172	57.0707	88.1313	94.9495	97.2222	100
	SEM	3.2075	12.1667	11.9552	5.6748	2.94493	2.77778	0
	NUM	4	4	4	4	4	4	4
			1	2	3	4
		a	-1.26412	-1.32074	-1.2587	-1.22336
		b	-0.248569	-0.156334	-0.122068	-0.407655
		c	1.02519	1.03902	1.02761	0.923637
		y=0.5	3.53373	5.73253	7.12292	2.60141
>EZ		0.01	0.03	0.05	0.1	0.2	0.3	0.4
HS	1	0	0	0.1	0.5	0.8	0.9	1
	2	0	0	0.1	0.6	0.6	0.9	1
	3	0	0.0714286	0.142857	0.5	0.571429	0.785714	1
	4	0.0588235	0.176471	0.235294	0.588235	0.941176	0.941176	1
	5	0	0	0.222222	0.444444	0.666667	0.777778	1
	average	1.17647	4.95798	16.0075	52.6536	71.5854	86.0934	100
	SEM	1.17647	3.46072	2.91845	2.94543	6.87572	3.32145	0
	NUM	5	5	5	5	5	5	5
			1	2	3	4	5
		a	-1.26267	-1.22365	-1.2619	-1.13673	-1.19148
		b	-0.065706	-0.058405	-0.039494	-0.087248	-0.050756
		c	1.09844	1.09833	1.21571	1.05485	1.10808
		y=0.5	11.3635	12.2498	14.3592	8.22035	13.2525

## Sheet: Figure3-S1-C
Figure 3—figure supplement 1 C
5 flies/group			5 flies/group			5 flies/group
nosNGT-GAL4>UAS-E(z) RNAi			+>UAS-E(z) RNAi			nosNGT-GAL4>+
1	0.6		1	0.4		1	0.4
0.6	0.4		1	0.6		1	0.6
1	0.8		1	0.4		1	0.6
0.6	0.4		1	1		1	0.8
1	0.8		1	0.6		1	0.6
1	0.4		0.8	0.6		1	0.4
1	0.6		1	0.6		1	0.8
1	0.6		0.8	0.6		1	0.6
1	0.6			0.8		1	0.8
1	0.4			0.6		1	0.8
0.8				0.6		1
0.8

## Sheet: Figure3-S1-D
Figure 3 —figure supplement 1 D
8-12 flies/group
NF
nos>+		0.01	0.03	0.05	0.1	0.2	0.3	0.4
	1	0	0.142857	0.214286	0.857143	1	1	1
	2	0	0.1875	0.5	0.8125	1	1	1
	3	0.166667	0.416667	0.583333	1	1	1	1
	4	0.0833333	0.333333	0.416667	0.916667	1	1	1
	5
	average	6.25	27.0089	42.8571	89.6577	100	100	100
	SEM	3.98928	6.357	7.91167	4.05421	0	0	0
	NUM	4	4	4	4	4	4	4
			1	2	3	4
		a	-1.28911	-1.25079	-1.09288	-1.11756
		b	-0.132028	-0.167525	-0.212594	-0.16761
		c	1.04928	1.02052	1.02191	1.004
		y=0.5	6.46147	5.23325	3.4765	4.75107
HS
nos>+		0.01	0.03	0.05	0.1	0.2	0.3	0.4
	1	0	0	0.0909091	0.454545	0.909091	1	1
	2	0	0.0909091	0.0909091	0.272727	0.818182	1	1
	3	0	0	0	0.181818	0.727273	0.909091	1
	4	0	0.0666667	0.133333	0.6	0.866667	0.933333	1
	5
	average	0	3.93939	7.87879	37.7273	83.0303	96.0606	100
	SEM	0	2.32762	2.81019	9.34125	3.90427	2.32762	0
	NUM	4	4	4	4	4	4	4
			1	2	3	4
		a	-1.34688	-1.45367	-1.77115	-1.22599
		b	-0.067395	-0.0426951	-0.0282264	-0.08404
		c	1.15445	1.33621	1.62574	1.05482
		r	0.970074	0.965333	0.964009	0.975914
		y=0.5	10.7092	12.9515	16.0556	9.43435
NOS>PCL
NF		0.01	0.03	0.05	0.1	0.2	0.3	0.4
	1	0.1	0.2	0.4	0.8	1	1	1
	2	0.111111	0.222222	0.444444	0.666667	1	1	1
	3	0.1	0.1	0.4	0.7	1	1	1
	4	0	0.1	0.2	0.7	0.9	0.9	1
	5	0.0666667	0.133333	0.333333	0.666667	1	1	1
	average	7.55556	15.1111	35.5556	70.6667	98	98	100
	SEM	2.03063	2.5483	4.27453	2.44949	2	2	0
	NUM	5	5	5	5	5	5	5
			1	2	3	4	5
		a	-1.14057	-1.0815	-1.15838	-1.19232	-1.17699
		b	-0.132551	-0.112781	-0.113469	-0.108159	-0.106629
		c	1.03769	1.04415	1.05117	1.00426	1.05894
		y=0.5	5.67339	6.09033	6.54567	7.95638	6.98368
NOS>PCL
HS		0.01	0.03	0.05	0.1	0.2	0.3	0.4
	1	0.0909091	0.272727	0.636364	0.727273	0.909091	1	1
	2	0	0.25	0.416667	0.5	0.75	0.833333	1
	3	0.0351906	0.242669	0.582356	0.652493	0.859971	0.930108	1
	4	0	0.0909091	0.545455	0.545455	0.727273	0.818182	1
	5	0	0.2	0.7	0.7	0.9	1	1
	average	2.52199	21.1261	57.6168	62.5044	82.9267	91.6325	100
	SEM	1.77801	3.23084	4.76341	4.40415	3.80814	3.91872	0
	NUM	5	5	5	5	5	5	5
			1	2	3	4	5
		a	-1.0594	-0.975229	-1.04928	-1.00158	-1.19397
		b	-0.166988	-0.080852	-0.153751	-0.117596	-0.19832
		c	0.982838	0.974046	0.948164	0.902962	0.967312
		y=0.5	4.70562	8.92208	5.53297	7.74257	4.72995
>PCL
NF
		0.01	0.03	0.05	0.1	0.2	0.3	0.4
	1	0.333333	0.416667	0.666667	0.833333	1	1	1
	2	0.272727	0.545455	0.909091	0.909091	1	1	1
	3	0.444444	0.444444	0.666667	0.777778	1	1	1
	4	0	0.5	0.625	0.75	1	1	1
	average	26.2626	47.6641	71.6856	81.7551	100	100	100
	SEM	9.44863	2.87438	6.48265	3.50876	0	0	0
	NUM	5	5	5	5	5	5	5
			1	2	3	4
		a	-0.830351	-1.04406	-0.701381	-1.18867
		b	-0.151577	-0.345039	-0.109784	-0.241741
		c	1.01612	0.995256	1.03117	0.979322
		y=0.5	3.13709	2.16148	2.53193	3.757
>PCL
HS		0.01	0.03	0.05	0.1	0.2	0.3	0.4
	1	0	0.0833333	0.416667	0.666667	0.916667	0.916667	1
	2	0	0.1	0.4	0.8	0.9	0.9	1
	3	0	0.111111	0.333333	0.333333	0.666667	0.888889	1
	4	0	0.333333	0.444444	0.444444	0.777778	0.777778	1
	5
	average	0	15.6944	39.8611	56.1111	81.5278	87.0833	100
	SEM	0	5.90727	2.36111	10.5556	5.84159	3.15393	0
	NUM	4	4	4	4	4	4	4
			1	2	3	4
		a	-1.1721	-1.20287	-1.30935	-0.917692
		b	-0.126829	-0.152576	-0.037086	-0.075241
		c	0.98732	0.969739	1.30127	0.966955
		y=0.5	6.91982	6.16277	13.2418	8.97953
