# Supplementary material for: Exposure to high-sugar diet induces transgenerational changes in sweet sensitivity and feeding behavior via H3K27me3 reprogramming
Source: eLife. 2023 Sep 12;12:e85365. doi: 10.7554/eLife.85365 (PMC10558205; doi:10.7554/eLife.85365)
Supplement: Figure 3—figure supplement 2—source data 1. [file elife-85365-fig3-figsupp2-data1.xlsx]

## Sheet: Figure 3-S2 A
Figure 3 —figure supplement 2 A
8-12 flies/group
NF
nos>+		0.01	0.03	0.05	0.1	0.2	0.3	0.4
	1	0	0.142857	0.214286	0.857143	1	1	1
	2	0	0.1875	0.5	0.8125	1	1	1
	3	0.166667	0.416667	0.583333	1	1	1	1
	4	0.0833333	0.333333	0.416667	0.916667	1	1	1
	5
	average	6.25	27.0089	42.8571	89.6577	100	100	100
	SEM	3.98928	6.357	7.91167	4.05421	0	0	0
	NUM	4	4	4	4	4	4	4
			1	2	3	4
		a	-1.28911	-1.25079	-1.09288	-1.11756
		b	-0.132028	-0.167525	-0.212594	-0.16761
		c	1.04928	1.02052	1.02191	1.004
		y=0.5	6.46147	5.23325	3.4765	4.75107
HS
nos>+		0.01	0.03	0.05	0.1	0.2	0.3	0.4
	1	0	0	0.0909091	0.454545	0.909091	1	1
	2	0	0.0909091	0.0909091	0.272727	0.818182	1	1
	3	0	0	0	0.181818	0.727273	0.909091	1
	4	0	0.0666667	0.133333	0.6	0.866667	0.933333	1
	5
	average	0	3.93939	7.87879	37.7273	83.0303	96.0606	100
	SEM	0	2.32762	2.81019	9.34125	3.90427	2.32762	0
	NUM	4	4	4	4	4	4	4
			1	2	3	4
		a	-1.34688	-1.45367	-1.77115	-1.22599
		b	-0.067395	-0.0426951	-0.0282264	-0.08404
		c	1.15445	1.33621	1.62574	1.05482
		r	0.970074	0.965333	0.964009	0.975914
		y=0.5	10.7092	12.9515	16.0556	9.43435
NOS>RPD3
NF		0.01	0.03	0.05	0.1	0.2	0.3	0.4
	1	0.0769231	0.0769231	0.307692	0.769231	0.846154	0.923077	1
	2	0	0.142857	0.285714	0.642857	1	1	1
	3	0.181818	0.0909091	0.181818	0.727273	1	1	1
	4	0	0.222222	0.222222	0.555556	0.888889	1	1
	5	0	0.1	0.3	0.7	0.9	1	1
	average	5.17483	12.6582	25.9489	67.8983	92.7009	98.4615	100
	SEM	3.5767	2.63221	2.45703	3.70525	3.11252	1.53846	0
	NUM	5	5	5	5	5	5	5
			1	2	3	4	5
		y=0.5	7.46845	8.60779	7.1584	7.33904	4.56501
NOS>RPD3
hs
		0.01	0.03	0.05	0.1	0.2	0.3	0.4
	1	0	0.166667	0.333333	0.583333	0.583333	0.75	1
	2	0	0.111111	0.444444	0.444444	0.666667	0.888889	1
	3	0	0.125	0.125	0.25	0.75	1	1
	4	0	0.125	0.375	0.375	0.75	0.75	1
	5	0	0	0.0833333	0.416667	0.583333	0.75	1
	average	0	10.5556	27.2222	41.3889	66.6667	82.7778	100
	SEM	0	2.79853	7.11729	5.38631	3.72678	5.07657	0
	NUM	5	5	5	5	5	5	5
			1	2	3	4
		a	-0.9555	-1.0822	-1.52382	-1.0685
		b	-0.070124	-0.058236	-0.035113	-0.055489
		c	0.948275	1.07574	1.44347	1.05487
		y=0.5	10.7927	10.8369	13.6534	11.8091
>RPD3
NF
		0.01	0.03	0.05	0.1	0.2	0.3	0.4
	1	0.0769231	0.0769231	0.307692	0.769231	0.846154	0.923077	1
	2	0.133333	0.2	0.533333	0.866667	1	1	1
	3	0	0.285714	0.428571	0.571429	1	1	1
	4	0.111111	0.111111	0.333333	0.777778	1	1	1
	5	0.2	0.3	0.6	1	1	1	1
	average	10.4274	19.475	44.0586	79.7021	96.9231	98.4615	100
	SEM	3.2921	4.48655	5.62686	7.00305	3.07692	1.53846	0
	NUM	5	5	5	5	5	5	5
			1	2	3	4	5
		a	-1.12887	-1.1719	-1.12607	-0.951383	-1.08783
		b	-0.159902	-0.117599	-0.111584	-0.122217	-0.194516
		c	1.02672	1.05254	1.0408	1.04457	1.02788
		y=0.5	4.76731	6.39343	5.46723	4.56501	3.7173
>RPD3
HS		0.01	0.03	0.05	0.1	0.2	0.3	0.4
	1	0	0.3	0.4	0.5	0.8	0.8	1
	2	0	0.142857	0.285714	0.642857	1	1	1
	3	0	0.111111	0.333333	0.444444	0.888889	0.888889	1
	4	0	0.2	0.3	0.6	0.7	0.8	1
	5	0	0	0.1	0.6	0.7	0.8	1
	average	0	15.0794	28.381	55.746	81.7778	85.7778	100
	SEM	0	4.95279	5.00023	3.67329	5.75851	3.95031	0
	NUM	5	5	5	5	5	5	5
			1	2	3	4	5
		a	-0.954094	-0.983755	-1.13886	-0.994897	-1.16139
		b	-0.088337	-0.13903	-0.078003	-0.088686	-0.0721264
		c	0.953081	0.960019	1.04481	0.941196	1.00902
		y=0.5	8.43012	6.57302	9.45275	9.16887	11.4368

## Sheet: Figure 3-S2 B
Figure 3—figure supplement 2 B
8-12 flies/group
NF
nos>+		0.01	0.03	0.05	0.1	0.2	0.3	0.4
	1	0	0.142857	0.214286	0.857143	1	1	1
	2	0	0.1875	0.5	0.8125	1	1	1
	3	0.166667	0.416667	0.583333	1	1	1	1
	4	0.0833333	0.333333	0.416667	0.916667	1	1	1
	5
	average	6.25	27.0089	42.8571	89.6577	100	100	100
	SEM	3.98928	6.357	7.91167	4.05421	0	0	0
	NUM	4	4	4	4	4	4	4
			1	2	3	4
		a	-1.28911	-1.25079	-1.09288	-1.11756
		b	-0.132028	-0.167525	-0.212594	-0.16761
		c	1.04928	1.02052	1.02191	1.004
		y=0.5	6.46147	5.23325	3.4765	4.75107
HS
nos>+		0.01	0.03	0.05	0.1	0.2	0.3	0.4
	1	0	0	0.0909091	0.454545	0.909091	1	1
	2	0	0.0909091	0.0909091	0.272727	0.818182	1	1
	3	0	0	0	0.181818	0.727273	0.909091	1
	4	0	0.0666667	0.133333	0.6	0.866667	0.933333	1
	5
	average	0	3.93939	7.87879	37.7273	83.0303	96.0606	100
	SEM	0	2.32762	2.81019	9.34125	3.90427	2.32762	0
	NUM	4	4	4	4	4	4	4
			1	2	3	4
		a	-1.34688	-1.45367	-1.77115	-1.22599
		b	-0.067395	-0.0426951	-0.0282264	-0.08404
		c	1.15445	1.33621	1.62574	1.05482
		r	0.970074	0.965333	0.964009	0.975914
		y=0.5	10.7092	12.9515	16.0556	9.43435
NOS>SU(VAR)3-5
NF
		0.01	0.03	0.05	0.1	0.2	0.3	0.4
	1	0	0.142857	0.428571	0.714286	0.857143	1	1
	2	0	0.230769	0.307692	0.538462	0.846154	1	1
	3	0.0909091	0.0909091	0.272727	0.727273	1	1	1
	4	0	0.142857	0.285714	0.571429	0.857143	1	1
	5	0	0.153846	0.461538	0.615385	1	1	1
	average	1.81818	15.2248	35.1249	63.3367	91.2088	100	100
	SEM	1.81818	2.248	3.90514	3.7771	3.5946	0	0
	NUM	5	5	5	5	5	5	5
			1	2	3	4	5
		a	-0.954094	-1.12607	-1.13886	-0.994897	-1.18853
		b	-0.088337	-0.111584	-0.078003	-0.088686	-0.12141
		c	0.953081	1.0408	1.04481	0.941196	1.03643
		y=0.5	8.43012	6.57302	9.45275	9.16887	6.55253
NOS>SU(VAR)3-5
HS
		0.01	0.03	0.05	0.1	0.2	0.3	0.4
	1	0.0909091	0.0909091	0.272727	0.454545	0.454545	0.818182	1
	2	0.1	0.2	0.3	0.3	0.6	0.9	1
	3	0	0	0.222222	0.444444	0.555556	0.777778	1
	4	0	0	0	0.4	0.6	0.8	1
	5
	average	4.77273	7.27273	19.8737	39.9747	55.2525	82.399	100
	SEM	2.76178	4.75284	6.81767	3.52967	3.42988	2.66495	0
	NUM	5	5	5	5	5	5	5
			1	2	3	4
		a	-3.88425	-2.40937	-1.34203	-1.54323
		b	-0.0066491	-0.012267	-0.034429	-0.03102
		c	3.97129	2.50389	1.2969	1.43429
		y=0.5	16.9049	15.0219	15.1388	16.1784
>SU(VAR)3-5
NF
		0.01	0.03	0.05	0.1	0.2	0.3	0.4
	1	0.142857	0.285714	0.714286	0.857143	1	1	1
	2	0.142857	0.285714	0.714286	1	1	1	1
	3	0.111111	0.222222	0.444444	0.666667	0.777778	0.888889	1
	4	0.222222	0.333333	0.444444	0.777778	1	1	1
	5	0	0.25	0.5	0.875	1	1	1
	average	12.381	27.5397	56.3492	83.5317	95.5556	97.7778	100
	SEM	3.59866	1.87644	6.23913	5.5193	4.44444	2.22222	0
	NUM	5	5	5	5	5	5	5
			1	2	3	4	5
		a	-1.11348	-1.18913	-0.945144	-0.966515	-1.26114
		b	-0.207009	-0.234377	-0.105461	-0.118074	-0.184834
		c	1.00856	1.02383	0.958005	1.03927	1.01911
		y=0.5	3.78566	3.49787	6.86943	4.94162	4.80245
>SU(VAR)3-5
HS
		0.01	0.03	0.05	0.1	0.2	0.3	0.4
	1	0.0833333	0.166667	0.333333	0.5	0.583333	0.583333	1
	2	0	0	0.285714	0.428571	0.571429	1	1
	3	0	0.0769231	0.307692	0.461538	0.692308	0.923077	1
	4	0	0	0.375	0.5	0.75	0.875	1
	5	0	0.0769231	0.230769	0.384615	0.692308	0.846154	1
	average	1.66667	6.41026	30.6502	45.4945	65.7875	84.5513	100
	SEM	1.66667	3.08759	2.40633	2.2074	3.45599	7.05303	0
	NUM	5	5	5	5	5	5	5
			1	2	3	4	5
		a	-1.4982	-1.36892	-1.17192	-1.12332	-1.25655
		b	-0.018069	-0.040053	-0.057415	-0.07804	-0.0441117
		c	1.62888	1.30776	1.11328	1.01378	1.20284
		y=0.5	15.6642	13.1704	11.2788	10.0238	13.171
