# Supplementary material for: Exposure to high-sugar diet induces transgenerational changes in sweet sensitivity and feeding behavior via H3K27me3 reprogramming
Source: eLife. 2023 Sep 12;12:e85365. doi: 10.7554/eLife.85365 (PMC10558205; doi:10.7554/eLife.85365)
Supplement: Figure 3—figure supplement 3—source data 1. [file elife-85365-fig3-figsupp3-data1.xlsx]

## Sheet: Figure3-S3 A
Figure 3 -figure supplement 3 A
8-12 flies/group
Mat-tub>ez
ND		0.01	0.03	0.05	0.1	0.2	0.3	0.4
	1		0.3	0.3	0.7	0.9	1	1
	2		0.222222	0.333333	0.555556	0.777778	0.888889	1
	3		0.333333	0.4	0.733333	0.933333	1	1
	4
		average	0.285185	0.344444	0.662963	0.87037	0.962963	1
		SEM	0.0329192	0.0293972	0.054559	0.0472857	0.037037	0
		NUM	3	3	3	3	3	3
			1	2	3
		a	-1.0805	-1.00025	-1.03105
		b	-0.105233	-0.0664307	-0.119412
		c	1.0329	1.05017	1.02208
		y=0.5	6.71703	8.99857	5.69879
Mat-tub>ez
F0		0.01	0.03	0.05	0.1	0.2	0.3	0.4
	1		0.1	0.2	0.4	0.5	0.8	0.9
	2		0.1	0.1	0.1	0.2	0.4	0.7
	3		0.1	0.2	0.2	0.2	0.5	0.8
	4		0.11	0.22	0.32	0.32	0.65	0.88
		average	0.1025	0.18	0.255	0.305	0.5875	0.82
		SEM	0.0025	0.0270801	0.0660177	0.0708872	0.0875	0.0454606
		NUM	4	4	4	4	4	4
			1	2	3	4
		a	-1.38809	0.0549631	0.052488	-160.753
		b	-0.024978	0.0631055	0.065942	-0.000121404
		c	1.41731	0.0182946	0.075334	160.814
		y=0.5	16.5845	34.3975	31.7054	22.545
Mat-tub>
ND
		0.01	0.03	0.05	0.1	0.2	0.3	0.4
	1	0	0.285714	0.571429	0.714286	0.857143	1	1
	2	0.133333	0.2	0.466667	0.8	1	1	1
	3	0.181818	0.363636	0.545455	0.909091	1	1	1
	4	0.1875	0.25	0.375	0.9375	1	1	1
	average	0.125663	0.274838	0.489637	0.840219	0.964286	1	1
	SEM	0.043615	0.0344252	0.0442293	0.0513839	0.0357143	0	0
	NUM	4	4	4	4	4	4	4
			1	2	3	4	5
		a	-1.12698	-1.10472	-1.03835	-1.08506
		b	-0.173889	-0.136374	-0.173853	-0.141343
		c	0.965287	1.03346	1.0208	1.04071
		y=0.5	5.08742	5.33802	3.96902	4.92774
Mat-tub>
F0		0.01	0.03	0.05	0.1	0.2	0.3	0.4
	1	0	0	0.1	0.3	0.6	0.8	0.8
	2	0.0555556	0.0555556	0.388889	0.5	0.888889	0.888889	0.888889
	3	0	0	0.333333	0.5	0.75	0.833333	0.916667
	4	0	0.0833333	0.0833333	0.416667	0.833333	0.833333	0.916667
	average	0.0138889	0.0347222	0.226389	0.429167	0.768056	0.838889	0.880556
	SEM	0.0138889	0.0208333	0.0786778	0.0473242	0.0628693	0.0184257	0.0276385
	NUM	4	4	4	4	4	4	4
			1	2	3	4
		a	-1.11705	-1.04504	-1.06113	-1.1538
		b	-0.0482991	-0.1001	-0.0905402	-0.0677806
		c	1.00665	0.945112	0.926756	1.01706
		y=0.5	16.3695	8.52629	10.0605	11.842
EZ
ND		0.01	0.03	0.05	0.1	0.2	0.3	0.4
	1	0	0.3	0.8	1	1	1	1
	2	0.1	0.5	0.7	0.9	0.9	0.9	1
	3	0	0.2	0.4	0.8	0.9	1	1
	4	0.1	0.2	0.8	0.8	1	1	1
	5	0.1	0.3	0.5	1	1	1	1
	average	6	30	64	90	96	98	100
	SEM	2.44949	5.47723	8.12404	4.47214	2.44949	2	0
	NUM	5	5	5	5	5	5	5
		1	2	3	4	5
	a	-1.43311	-1.15342	-1.19549	-1.18341	-1.18924
	b	-0.299967	-0.322054	-0.147578	-0.218818	-0.192464
	c	1.01991	0.936174	1.00346	1.00148	1.02943
	y=0.5	3.3802	3.01949	5.86003	3.92382	4.20477
EZ
F0		0.01	0.03	0.05	0.1	0.2	0.3	0.4
	1	0	0	0.2	0.4	0.6	0.8	0.9
	2	0	0	0.2	0.5	0.7	0.9	1
	3	0.1	0.2	0.2	0.3	0.5	0.9	0.9
	4	0	0.1	0.1	0.4	0.7	0.7	0.9
	5	0	0	0	0.2	0.5	0.9	1
	average	2	6	14	36	60	84	94
	SEM	2	4	4	5.09902	4.47214	4	2.44949
	NUM	5	5	5	5	5	5	5
		1	2	3	4	5
	a	-1.12766	-1.21752	-2.30564	-1.0595	-3.80768
	b	-0.0505199	-0.0606026	-0.0120149	-0.0565864	-0.00899769
	c	1.04361	1.0989	2.38068	0.977318	3.70633
	y=0.5	14.4431	11.7072	16.956	14.0912	19.1041

## Sheet: Figure3-S3 B
Figure 3 -figure supplement 3 B
8-12 flies/group
Mat-tub>pcl
ND		0.01	0.03	0.05	0.1	0.2	0.3	0.4
	1	0.25	0.375	0.5	0.875	1	1	1
	2	0.0769231	0.230769	0.461538	0.769231	0.846154	1	1
	3	0.0909091	0.0909091	0.363636	0.909091	1	1	1
	4	0.166667	0.333333	0.333333	0.666667	1	1	1
	5
	average	0.146125	0.257503	0.414627	0.804997	0.961538	1	1
	SEM	0.0398431	0.0632614	0.0394736	0.0548866	0.0384615	0	0
	NUM	4	4	4	4	4	4	4
		1	2	3	4	5
	a	-0.94737	-1.07117	-1.23165	-1.01761
	b	-0.143431	-0.136441	-0.143433	-0.094632
	c	1.02782	0.99116	1.04398	1.06525
	y=0.5	4.07819	5.71486	5.69749	6.21284
Mat-tub>pcl
F0		0.01	0.03	0.05	0.1	0.2	0.3	0.4
	1	0.0666667	0.133333	0.2	0.4	0.533333	0.533333	0.533333
	2	0	0.2	0.333333	0.4	0.466667	0.533333	0.533333
	3	0	0	0	0.0833333	0.5	0.5	0.666667
	4	0	0	0.0588235	0.352941	0.588235	0.588235	0.764706
	5
	average	0.0166667	0.0833333	0.148039	0.309069	0.522059	0.538725	0.62451
	SEM	0.0166667	0.05	0.0746709	0.0760582	0.0259187	0.018278	0.0563164
	NUM	4	4	4	4	4	4	4
		1	2	3	4
	a	-0.579909	-0.621045	-1.26464	-0.933809
	b	-0.118074	-0.222941	-0.022867	-0.058953
	c	0.556897	0.508621	1.17785	0.823408
	y=0.5	19.6625	19.1854	27.2713	17.9865
Mat-tub>
ND
		0.01	0.03	0.05	0.1	0.2	0.3	0.4
	1	0	0.285714	0.571429	0.714286	0.857143	1	1
	2	0.133333	0.2	0.466667	0.8	1	1	1
	3	0.181818	0.363636	0.545455	0.909091	1	1	1
	4	0.1875	0.25	0.375	0.9375	1	1	1
	average	0.125663	0.274838	0.489637	0.840219	0.964286	1	1
	SEM	0.043615	0.0344252	0.0442293	0.0513839	0.0357143	0	0
	NUM	4	4	4	4	4	4	4
			1	2	3	4	5
		a	-1.12698	-1.10472	-1.03835	-1.08506
		b	-0.173889	-0.136374	-0.173853	-0.141343
		c	0.965287	1.03346	1.0208	1.04071
		y=0.5	5.08742	5.33802	3.96902	4.92774
Mat-tub>
F0		0.01	0.03	0.05	0.1	0.2	0.3	0.4
	1	0	0	0.1	0.3	0.6	0.8	0.8
	2	0.0555556	0.0555556	0.388889	0.5	0.888889	0.888889	0.888889
	3	0	0	0.333333	0.5	0.75	0.833333	0.916667
	4	0	0.0833333	0.0833333	0.416667	0.833333	0.833333	0.916667
	average	0.0138889	0.0347222	0.226389	0.429167	0.768056	0.838889	0.880556
	SEM	0.0138889	0.0208333	0.0786778	0.0473242	0.0628693	0.0184257	0.0276385
	NUM	4	4	4	4	4	4	4
			1	2	3	4
		a	-1.11705	-1.04504	-1.06113	-1.1538
		b	-0.0482991	-0.1001	-0.0905402	-0.0677806
		c	1.00665	0.945112	0.926756	1.01706
		y=0.5	16.3695	8.52629	10.0605	11.842
pcl
ND		0.01	0.03	0.05	0.1	0.2	0.3	0.4
	1	0.2	0.4	0.7	0.9	1	1	1
	2	0.4	0.6	0.8	0.9	1	1	1
	3	0.1	0.4	0.7	0.7	1	1	1
	4	0.1	0.5	0.6	0.8	1	1	1
	5
	average	20	47.5	70	82.5	100	100	100
	SEM	7.07107	4.78714	4.08248	4.78714	0	0	0
	NUM	4	4	4	4	4	4	4
		1	2	3	4
	a	-1.03319	-0.762601	-1.04722	-1.05534
	b	-0.215572	-0.235589	-0.192262	-0.203871
	c	1.0087	0.999051	0.990286	0.995987
	y=0.5	3.28681	1.79985	3.94726	3.70365
pcl
F0		0.01	0.03	0.05	0.1	0.2	0.3	0.4
	1	0	0.1	0.4	0.6	0.9	0.9	1
	2	0	0	0.2	0.6	0.9	0.9	1
	3	0	0.1	0.2	0.4	0.6	0.9	1
	4	0	0.1	0.3	0.4	0.8	0.9	1
	5
	average	0	7.5	27.5	50	80	90	100
	SEM	0	2.5	4.78714	5.7735	7.07107	0	0
	NUM	4	4	4	4	4	4	4
		1	2	3	4
	a	-1.13634	-1.22859	-1.40745	-1.17516
	b	-0.112245	-0.0926101	-0.0336345	-0.0605172
	c	0.988233	1.02995	1.37518	1.10602
	y=0.5	7.52623	9.07925	14.1256	10.9431
