# Supplementary material for: Exposure to high-sugar diet induces transgenerational changes in sweet sensitivity and feeding behavior via H3K27me3 reprogramming
Source: eLife. 2023 Sep 12;12:e85365. doi: 10.7554/eLife.85365 (PMC10558205; doi:10.7554/eLife.85365)
Supplement: Figure 3—source data 1. [file elife-85365-fig3-data1.xlsx]

## Sheet: Figure 3 B
Figure 3 B
15 flies/group
			Area	Mean	Min	Max	IntDen	RawIntDen
H3		1	0.015	65525.9	65413	65533	978.519	88066754
	KD	2	0.013	65527.9	65432	65533	870.065	78305893
		3	0.014	65529.3	65429	65533	922.507	83025647
	KD	4	0.013	65529.8	65415	65533	881.74	79356622
		5	0.014	65530.6	65444	65534	923.253	83092758		average control			Mat-GAL4	Mat-GAL4>EZ
	KD	6	0.013	65530.1	65430	65535	826.408	74376717	H3K27me3/H3	1.04842	1.10071		1.10071	0.413071
H3K27me3		7	0.017	65525.5	65388	65534	1129.22	101630002	1.15401		0.413071		0.997453	0.48593
	KD	8	0.006	65467.6	65377	65533	376.802	33912223	0.433073		0.997453		0.901837	0.583208
		9	0.015	65527.9	65408	65534	964.716	86824452	1.04575		0.48593
	KD	10	0.007	65525.2	65410	65535	449.212	40429040	0.509461		0.901837
		11	0.013	65525.3	65388	65535	872.943	78564888	0.945508		0.583208
	KD	12	0.008	65529.7	65444	65535	505.307	45477596	0.61145

## Sheet: Figure 3 C
Figure 3 B

## Sheet: Figure 3 D
Figure 3 D
8-12 flies/group
Mat-tub>ez
ND		0.01	0.03	0.05	0.1	0.2	0.3	0.4
	1		0.3	0.3	0.7	0.9	1	1
	2		0.222222	0.333333	0.555556	0.777778	0.888889	1
	3		0.333333	0.4	0.733333	0.933333	1	1
	4
		average	0.285185	0.344444	0.662963	0.87037	0.962963	1
		SEM	0.0329192	0.0293972	0.054559	0.0472857	0.037037	0
		NUM	3	3	3	3	3	3
			1	2	3
		a	-1.0805	-1.00025	-1.03105
		b	-0.105233	-0.0664307	-0.119412
		c	1.0329	1.05017	1.02208
		y=0.5	6.71703	8.99857	5.69879
Mat-tub>ez
F1
		0.01	0.03	0.05	0.1	0.2	0.3	0.4
	1		0.4	0.5	0.7	1	1	1
	2		0.444444	0.555556	0.666667	0.722222	0.888889	1
	3		0.307692	0.384615	0.769231	0.923077	0.923077	1
	4
		average	0.384046	0.480057	0.711966	0.881766	0.937322	1
		SEM	0.0402749	0.0503436	0.0302061	0.0828051	0.0328563	0
		NUM	42	42	42	42	42	42
			1	2	3
		a	-0.914545	-1.02182	-1.09275
		b	-0.111158	-0.019853	-0.146259
		c	1.03717	1.4526	0.977788
		y=0.5	4.78694	3.53278	5.65633
Mat-tub>
ND
		0.01	0.03	0.05	0.1	0.2	0.3	0.4
	1	0	0.285714	0.571429	0.714286	0.857143	1	1
	2	0.133333	0.2	0.466667	0.8	1	1	1
	3	0.181818	0.363636	0.545455	0.909091	1	1	1
	4	0.1875	0.25	0.375	0.9375	1	1	1
	average	0.125663	0.274838	0.489637	0.840219	0.964286	1	1
	SEM	0.043615	0.0344252	0.0442293	0.0513839	0.0357143	0	0
	NUM	4	4	4	4	4	4	4
			1	2	3	4	5
		a	-1.12698	-1.10472	-1.03835	-1.08506
		b	-0.173889	-0.136374	-0.173853	-0.141343
		c	0.965287	1.03346	1.0208	1.04071
		y=0.5	5.08742	5.33802	3.96902	4.92774
Mat-tub>
F1		0.01	0.03	0.05	0.1	0.2	0.3	0.4
	1	0	0.142857	0.285714	0.571429	0.857143	0.857143	0.857143
	2	0.0909091	0.0909091	0.181818	0.545455	0.909091	1	1
	3	0	0.166667	0.266667	0.7	0.966667	0.966667	1
	4	0	0.0625	0.125	0.625	0.9375	0.9375	1
	average	0.0227273	0.0284091	0.2148	0.610471	0.9176	0.940327	0.964286
	SEM	0.0227273	0.0237696	0.0374954	0.0341296	0.0233292	0.0305263	0.0357143
	NUM	55	55	55	55	55	55	55
			1	2	3	4
		a	-1.04071	-1.20771	-1.20522	-1.25333
		b	-0.115853	-0.071664	-0.114936	-0.091521
		c	0.898314	1.12111	1.03235	1.05604
		y=0.5	8.28997	9.27907	7.10923	8.88016
EZ
ND		0.01	0.03	0.05	0.1	0.2	0.3	0.4
	1	0	0.3	0.8	1	1	1	1
	2	0.1	0.5	0.7	0.9	0.9	0.9	1
	3	0	0.2	0.4	0.8	0.9	1	1
	4	0.1	0.2	0.8	0.8	1	1	1
	5	0.1	0.3	0.5	1	1	1	1
	average	6	30	64	90	96	98	100
	SEM	2.44949	5.47723	8.12404	4.47214	2.44949	2	0
	NUM	5	5	5	5	5	5	5
		1	2	3	4	5
	a	-1.43311	-1.15342	-1.19549	-1.18341	-1.18924
	b	-0.299967	-0.322054	-0.147578	-0.218818	-0.192464
	c	1.01991	0.936174	1.00346	1.00148	1.02943
	y=0.5	3.3802	3.01949	5.86003	3.92382	4.20477
EZ
F1		0.01	0.03	0.05	0.1	0.2	0.3	0.4
	1	0	0	0.1	0.6	0.6	0.9	1
	2	0	0.1	0.3	0.8	0.8	1	1
	3	0	0.2	0.3	0.6	1	1	1
	4	0	0	0	0.4	0.7	0.7	1
	5	0.1	0.1	0.2	0.5	0.8	0.9	1
	average	2	8	18	58	78	90	100
	SEM	2	3.74166	5.83095	6.63325	6.63325	5.47723	0
	NUM	5	5	5	5	5	5	5
		1	2	3	4	5
	a	-1.22365	-1.19832	-1.19533	-1.33329	-1.15248
	b	-0.0584056	-0.1252	-0.102551	-0.0410827	-0.0578819
	c	1.09833	0.999685	1.06153	1.2087	1.12061
	y=0.5	12.2497	6.98637	7.36726	15.3829	10.6936

## Sheet: Figure 3 E
Figure 3 E
8-12 flies/group
Mat-tub>pcl
ND		0.01	0.03	0.05	0.1	0.2	0.3	0.4
	1	0.25	0.375	0.5	0.875	1	1	1
	2	0.0769231	0.230769	0.461538	0.769231	0.846154	1	1
	3	0.0909091	0.0909091	0.363636	0.909091	1	1	1
	4	0.166667	0.333333	0.333333	0.666667	1	1	1
	5
	average	0.146125	0.257503	0.414627	0.804997	0.961538	1	1
	SEM	0.0398431	0.0632614	0.0394736	0.0548866	0.0384615	0	0
	NUM	4	4	4	4	4	4	4
		1	2	3	4	5
	a	-0.94737	-1.07117	-1.23165	-1.01761
	b	-0.143431	-0.136441	-0.143433	-0.094632
	c	1.02782	0.99116	1.04398	1.06525
	y=0.5	4.07819	5.71486	5.69749	6.21284
Mat-tub>pcl
F1		0.01	0.03	0.05	0.1	0.2	0.3	0.4
	1	0.1	0.4	0.4	0.5	0.9	0.9	1
	2	0.1	0.4	0.4	0.7	0.9	1	1
	3	0	0.125	0.375	0.75	0.875	0.875	0.875
	4	0	0.111111	0.222222	0.666667	1	1	1
	5	0.222222	0.444444	0.555556	0.666667	1	1	1
	average	0.0844444	0.296111	0.390556	0.656667	0.935	0.955	0.975
	SEM	0.041066	0.0731753	0.0529063	0.0420317	0.0269258	0.0278388	0.025
	NUM	5	5	5	5	5	5	5
		1	2	3	4	5
	a	-0.938242	-0.986258	-1.12147	-1.26058	-0.875832
	b	-0.075159	-0.112506	-0.160283	-0.105055	-0.111584
	c	1.03707	1.01654	0.901311	1.06686	1.03173
	y=0.5	7.42266	5.7487	6.41154	7.60752	4.4723
Mat-tub>
ND
		0.01	0.03	0.05	0.1	0.2	0.3	0.4
	1	0	0.285714	0.571429	0.714286	0.857143	1	1
	2	0.133333	0.2	0.466667	0.8	1	1	1
	3	0.181818	0.363636	0.545455	0.909091	1	1	1
	4	0.1875	0.25	0.375	0.9375	1	1	1
	average	0.125663	0.274838	0.489637	0.840219	0.964286	1	1
	SEM	0.043615	0.0344252	0.0442293	0.0513839	0.0357143	0	0
	NUM	4	4	4	4	4	4	4
			1	2	3	4	5
		a	-1.12698	-1.10472	-1.03835	-1.08506
		b	-0.173889	-0.136374	-0.173853	-0.141343
		c	0.965287	1.03346	1.0208	1.04071
		y=0.5	5.08742	5.33802	3.96902	4.92774
Mat-tub>
F1		0.01	0.03	0.05	0.1	0.2	0.3	0.4
	1	0	0.142857	0.285714	0.571429	0.857143	0.857143	0.857143
	2	0.0909091	0.0909091	0.181818	0.545455	0.909091	1	1
	3	0	0.166667	0.266667	0.7	0.966667	0.966667	1
	4	0	0.0625	0.125	0.625	0.9375	0.9375	1
	average	0.0227273	0.0284091	0.2148	0.610471	0.9176	0.940327	0.964286
	SEM	0.0227273	0.0237696	0.0374954	0.0341296	0.0233292	0.0305263	0.0357143
	NUM	4	4	4	4	4	4	4
			1	2	3	4
		a	-1.04716	-1.2488	-1.18676	-1.32841
		b	-0.0959996	-0.0541142	-0.122535	-0.0552352
		c	0.921249	1.19621	1.02261	1.18406
		y=0.5	9.48564	10.7973	6.69319	12.0158
pcl
ND		0.01	0.03	0.05	0.1	0.2	0.3	0.4
	1	0.2	0.4	0.7	0.9	1	1	1
	2	0.4	0.6	0.8	0.9	1	1	1
	3	0.1	0.4	0.7	0.7	1	1	1
	4	0.1	0.5	0.6	0.8	1	1	1
	5
	average	20	47.5	70	82.5	100	100	100
	SEM	7.07107	4.78714	4.08248	4.78714	0	0	0
	NUM	4	4	4	4	4	4	4
		1	2	3	4
	a	-1.03319	-0.762601	-1.04722	-1.05534
	b	-0.215572	-0.235589	-0.192262	-0.203871
	c	1.0087	0.999051	0.990286	0.995987
	y=0.5	3.28681	1.79985	3.94726	3.70365
pcl
F1			0.03	0.05	0.1	0.2	0.3	0.4
	1	0	0.2	0.5	0.6	0.9	0.9	1
	2	0	0	0.2	0.4	0.6	0.8	1
	3	0	0.1	0.5	0.8	1	1	1
	4	0	0.2	0.2	0.6	0.8	1	1
	5
	average	0	12.5	35	60	82.5	92.5	100
	SEM	0	4.78714	8.66025	8.16497	8.53913	4.78714	0
	NUM	4	4	4	4	4	4	4
		1	2	3	4
	a	-1.08256	-1.37193	-1.276	-1.16076
	b	-0.13055	-0.0351254	-0.159368	-0.0795107
	c	0.963678	1.31004	1.02558	1.06891
	y=0.5	6.49479	15.0002	5.56566	8.96879
