# Supplementary material for: Exposure to high-sugar diet induces transgenerational changes in sweet sensitivity and feeding behavior via H3K27me3 reprogramming
Source: eLife. 2023 Sep 12;12:e85365. doi: 10.7554/eLife.85365 (PMC10558205; doi:10.7554/eLife.85365)
Supplement: Figure 4—figure supplement 1—source data 1. [file elife-85365-fig4-figsupp1-data1.xlsx]

## Sheet: Figure4-S1 A
Figure 4—figure supplement 1 A
20 flies/group
				Area	Mean	Min	Max	IntDen	RawIntDen
H3	head	EED226	1	889	65486.2	65322	65535	58217247	58217247
			2	836	65495.1	65358	65535	54753908	54753908
			3	752	65493.7	65341	65535	49251270	49251270
		DMSO	4	1226	65506.4	65346	65534	80310822	80310822
			5	1338	65504	65341	65534	87644300	87644300
			6	1322	65524.7	65403	65534	86623654	86623654
	decaptitated body	EED226	7	884	65514.8	65357	65535	57915082	57915082
			8	688	65513.5	65361	65535	45073298	45073298
			9	702	65505.9	65360	65535	45985118	45985118
		DMSO	10	929	65508.9	65334	65535	60857735	60857735
			11	811	65506.7	65376	65535	53125906	53125906					Head
			12	887	65513.7	65377	65535	58110658	58110658	H3K27me3/H3				EED226	DMSO
H3K27me3	head	EED226	13	572	65348.4	65335	65366	37379286	37379286	0.642066		0.445193		0.445193	0.881546
			14	395	65360.2	65341	65382	25817276	25817276	0.471515		0.326938		0.326938	0.852929
			15	373	65358.3	65341	65392	24378655	24378655	0.494985		0.343211		0.343211	1.26552
		DMSO	16	1559	65494.3	65372	65523	102105614	102105614	1.27138		0.881546
			17	1646	65499.4	65376	65520	107811990	107811990	1.23011		0.852929		Body
			18	2414	65493.8	65361	65521	158102134	158102134	1.82516	1.44222	1.26552		EED226	DMSO
	decaptitated body	EED226	19	1073	65505.2	65402	65523	70287045	70287045	1.21362		0.848371		0.848371	1.28409
			20	716	65475.5	65352	65526	46880458	46880458	1.04009		0.727067		0.721177	0.952339
			21	781	65478.6	65366	65528	51138774	51138774	1.11207		0.777383		0.771085	0.739262
		DMSO	22	1721	65488.1	65371	65526	112705067	112705067	1.85194		1.29458
			23	1114	65500.3	65372	65530	72967337	72967337	1.37348		0.960117
			24	946	65492.8	65357	65533	61956157	61956157	1.06618	1.43053	0.7453
				Area	Mean	Min	Max	IntDen	RawIntDen
H3	head	DMSO	1	0.009	65504.9	65357	65534	593.911	53452023
			2	0.008	65505.1	65381	65523	524.04	47163636
			3	0.009	65497.6	65354	65514	582.2	52398041
		EED226	4	0.007	65506.5	65386	65517	484.02	43561796
			5	0.008	65502.8	65365	65515	515.288	46375948
			6	0.01	65497.7	65368	65516	638.966	57506981
	decaptitated body	EED227	7	0.007	65508.6	65381	65524	460.744	41466953
			8	0.007	65509.8	65371	65528	462.208	41598740
			9	0.008	65501.4	65346	65526	516.733	46505960
		DMSO	10	0.007	65507.8	65352	65521	484.03	43562694
			11	0.008	65510.1	65396	65522	499.332	44939909						Head
			12	0.006	65516.2	65361	65535	416.392	37475245	H3K27me3/H3					EED226	DMSO
H3K27me3	head	DMSO	13	0.007	65485.6	65349	65529	454.761	40928498	0.765706		0.970662			0.886078	0.970662
			14	0.006	65487.2	65361	65522	406.02	36541831	0.774788		0.982176			0.81814	0.982176
			15	0.007	65481.9	65348	65523	480.928	43283521	0.826053	0.788849	1.04716			0.727634	1.04716
		EED226	16	0.005	65481.6	65354	65524	338.321	30448921	0.698981		0.886078
			17	0.005	65493.4	65382	65526	332.561	29930505	0.645389		0.81814
			18	0.006	65493.3	65378	65524	366.762	33008604	0.573993		0.727634			Body
	decaptitated body	EED226	19	0.004	65416.1	65354	65469	290.738	26166444	0.631019		0.706101			EED226	DMSO
			20	0.005	65419	65343	65505	345.994	31139465	0.748568		0.837637			0.706101	0.941349
			21	0.006	65435	65332	65529	381.704	34353379	0.738687		0.826581			0.837637	0.909707
		DMSO	22	0.006	65441.3	65339	65529	407.191	36647148	0.841252		0.941349			0.826581	1.14894
			23	0.006	65474.8	65346	65528	405.944	36534952	0.812974		0.909707
			24	0.007	65439.8	65332	65535	427.54	38478585	1.02677	0.893666	1.14894

## Sheet: Figure4-S1 B
	Figure 4-figure supplement1 B
5 flies/group
	ND							F0							F1
	Gr5a-GAL4>UAS-E(z) RNAi	+/UAS-E(z) RNAi	Gr5a-GAL4/+					Gr5a-GAL4>UAS-E(z) RNAi	+/UAS-E(z) RNAi	Gr5a-GAL4/+					Gr5a-GAL4>UAS-E(z) RNAi	+/UAS-E(z) RNAi	Gr5a-GAL4/+
group1	0.8	0.6	1				group1	0.4	0.2	0.4				group1	0.6	0.4	0.6
group2	0.4	0.6	1				group2	0.4	0.4	0.2				group2	0.6	0.4	0.4
group3	0.6	0.6	0.8				group3	0.8	0.4	0.4				group3	0.4	0.4	0.4
group4	0.8	1	1				group4	0.4	0.4	0.4				group4	0.4	0.4	0.6
group5	0.4	0.8	1				group5	0.4	0.2	0.6				group5	0.4	0.2	0.4
group6	0.4	1	0.6				group6	0.4	0.4	0.2				group6	0.8	0.4	0.2
group7	0.6	0.8	0.8				group7	0.6	0.2	0.2				group7	0.6	0.6	0.6
group8	0.5	0.8	0.6											group8	0.5	0.8	0.6
