# Supplementary material for: Exposure to high-sugar diet induces transgenerational changes in sweet sensitivity and feeding behavior via H3K27me3 reprogramming
Source: eLife. 2023 Sep 12;12:e85365. doi: 10.7554/eLife.85365 (PMC10558205; doi:10.7554/eLife.85365)
Supplement: Figure 4—source data 1. [file elife-85365-fig4-data1.xlsx]

## Sheet: Figure4-A
Figure 4-A
200 mM sucrose													200 mM sucrose													200 mM sucrose
DMSO													Chaetocin													EED226
WT	F1	F2	F3	F4									WT	F1	F2	F3	F4									WT	F1	F2	F3	F4
1	1	1	1	1									1	1	1	1	1									1	1	1	1	1
0	0	0	1	0		5 flies/group							0	0	0	0	0		5 flies/group							0	1	0	0	0		5 flies/group
1	0	0	1	0			DMSO						1	0	0	0	1			Chaetocin						1	0	1	1	1			EED226
0	0	0	0	1			WT	F1	F2	F3	F4		0	0	1	0	0			WT	F1	F2	F3	F4		0	1	0	0	0			WT	F1	F2	F3	F4
1	1	0	0	0		group1	0.6	0.4	0.2	0.6	0.4		1	1	0	0	0		group1	0.6	0.4	0.4	0.2	0.4		1	0	1	1	1		group1	0.6	0.6	0.6	0.6	0.6
1	0	0	0	0		group2	0.8	0.2	0.2	0	0.2		0	0	0	0	0		group2	0.6	0.4	0.2	0.2	0		1	1	1	0	1		group2	0.6	0.6	0.6	0.4	0.6
0	0	1	0	0		group3	0.6	0	0.2	0	0.2		1	1	0	0	0		group3	0.6	0.2	0.2	0	0.2		0	0	1	1	0		group3	0.6	0.6	0.8	0.4	0.2
1	1	0	0	0		group4	0.6	0.2	0.2	0	0.2		1	0	1	0	0		group4	0.2	0.2	0.2	0.2	0		1	1	0	1	1		group4	0.4	0.2	0.4	0.2	0.4
1	0	0	0	1		group5	0.4	0.2	0.2	0.2	0.2		1	0	0	0	0		group5	0.4	0.2	0.2	0.2	0.4		1	1	1	0	1		group5	0.2	0.4	0.4	0.4	0.2
1	0	0	0	0		group6	0.4	0.2	0.2	0	0.2		0	1	0	1	0		group6	0.2	0.2	0	0.4	0.4		0	0	0	0	0		group6	0.4	0.6	0.4	0.6	0.2
0	0	1	0	0		group7	0.4	0.4	0.2	0.4	0.4		1	0	0	0	0		group7	0.4	0.2	0.4	0.2	0.2		1	1	1	1	0		group7	0.4	0.4	0.2	0.4	0.4
1	0	0	0	0		group8	0.4	0	0.4	0.2	0.4		0	0	0	0	0		group8	0.6	0.2	0.4	0.4	0.2		0	1	1	0	1		group8	0.2	0.2	0.6	0.6	0.4
1	0	0	0	0		group9	0.6	0.4	0.4	0.2	0.2		1	1	0	0	1		group9	0.2	0.4	0	0.2	0.4		0	1	0	0	0		group9	0.6	0.8	0.6	0.8	0.4
0	0	0	0	0		group10	0.6	0	0	0.4	0.4		0	0	0	0	0		group10	0.4	0.2	0.4	0.2	0.2		1	0	1	0	0		group10	0.4	0.4	0.6	0.2	0.4
1	0	0	0	1		mean (%)	54	20	22	20	28		1	0	1	0	0		mean (%)	42	26	24	22	24		1	0	1	1	0		mean (%)	44	48	52	46	38
1	0	0	0	0		SEM (%)	4.26875	5.16398	3.59011	6.66667	3.26599		0	0	0	0	0		SEM (%)	5.53775	3.05505	4.98888	3.59011	4.98888		1	0	0	0	1		SEM (%)	4.98888	6.1101	5.33333	6	4.66667
1	0	1	0	0		number	10	10	10	10	10		0	0	0	0	0		number	10	10	10	10	10		0	1	1	0	0		number	10	10	10	10	10
0	1	0	0	0									0	0	0	0	0									0	0	0	0	0
1	0	0	0	1									0	1	0	1	0									1	0	1	1	1
0	0	0	0	0									1	0	1	0	0									0	0	0	0	0
0	0	0	0	0									0	0	0	0	1									0	1	0	1	0
1	0	0	0	1									0	0	0	1	0									1	0	1	0	1
0	0	0	1	0									1	0	0	0	1									0	1	0	0	0
0	1	1	0	0									0	1	0	0	0									0	0	1	1	0
1	0	0	0	0									1	0	1	0	0									0	0	0	0	0
0	0	0	0	0									0	0	0	0	1									0	0	0	1	0
1	0	0	0	0									0	0	0	0	0									1	1	1	0	1
0	1	0	0	0									1	1	0	0	1									0	1	0	1	0
0	0	0	0	0									0	0	0	1	0									0	0	1	0	0
1	0	1	0	1									0	0	0	1	0									1	1	0	1	0
0	1	0	0	0									0	0	1	1	0									0	0	0	1	1
0	0	0	1	1									1	0	0	0	1									0	0	0	1	0
0	0	0	1	0									0	1	0	0	0									1	1	0	0	0
1	0	1	0	0									0	0	1	0	0									0	1	1	0	1
1	1	0	0	1									1	0	0	0	0									1	0	0	0	0
1	0	0	0	0									0	0	0	1	0									1	0	1	1	0
0	0	0	0	0									0	1	0	1	0									0	0	1	1	0
0	0	0	0	1									1	0	1	0	1									0	1	0	1	1
0	0	1	0	0									1	0	0	0	0									0	0	1	0	1
1	0	1	1	1									1	0	1	0	0									0	0	0	0	0
0	1	1	1	0									0	1	0	0	1									1	1	0	0	1
1	0	0	0	0									0	0	0	1	0									1	1	1	1	1
0	0	1	0	1									1	0	0	0	0									1	0	1	1	0
1	0	0	0	0									0	1	0	0	1									0	1	1	1	0
1	1	0	0	0									0	0	0	0	0									0	1	0	1	0
0	0	0	0	1									1	0	1	0	0									0	0	0	0	1
1	0	0	1	0									1	0	0	0	0									1	1	1	0	0
1	0	0	1	0									0	1	1	1	1									0	0	1	1	0
0	0	0	0	1									0	0	0	0	0									0	0	0	0	0
1	0	0	0	0									0	0	0	0	0									1	1	1	0	1

## Sheet: Figure4-B
Figure 4-B
6-12 flies/group
WT-DMSO	0.01	0.03	0.05	0.1	0.2	0.3	0.4
	0	1	1	1	1	1	1
	0	0	0	0	1	1	1
	0	0	0	0	1	1	1
	0	0	0	0	0	1	1
	1	1	1	1	1	1	1
	0	0	0	1	1	1	1
	0	1	1	1	1	1	1			WT-DMSO	0.01	0.03	0.05	0.1	0.2	0.3	0.4
	0	0	0	1	1	1	1			group1	0.125	0.375	0.375	0.625	0.875	1	1
	0.125	0.375	0.375	0.625	0.875	1	1	group1		group2	0.111111	0.333333	0.444444	0.777778	1	1	1
	1	1	1	1	1	1	1			group3	0.181818	0.181818	0.454545	0.818182	1	1	1
	0	1	1	1	1	1	1
	0	0	0	1	1	1	1
	0	0	0	0	1	1	1			mean (%)	0.146465	0.257576	0.449495	0.79798	1	1	1
	0	0	0	1	1	1	1			SEM (%)	0.0353535	0.0757576	0.00505051	0.020202	0	0	0
	0	0	0	1	1	1	1			number	3	3	3	3	3	3	3
	0	1	1	1	1	1	1
	0	0	0	0	1	1	1
	0	0	1	1	1	1	1				1	2	3
	0.111111	0.333333	0.444444	0.777778	1	1	1	group2		a	-0.972053	-1.06509	-1.07498
	0	0	0	0	1	1	1			b	-0.085966	-0.137865	-0.129625
	0	0	0	1	1	1	1			c	1.04873	1.02724	1.03915
	0	0	1	1	1	1	1
	0	0	0	0	1	1	1			y=0.5 (S50)	6.65157	5.10027	5.32349
	0	0	1	1	1	1	1
	0	0	1	1	1	1	1
	0	0	0	1	1	1	1
	1	1	1	1	1	1	1
	0	0	0	1	1	1	1
	1	1	1	1	1	1	1
	0	0	0	1	1	1	1
	0.181818	0.181818	0.454545	0.818182	1	1	1	group3
F1-DMSO	0	0	0	0	0	1	1
	0	0	0	0	1	1	1
	0	0	0	0	1	1	1
	0	0	0	0	0	1	1
	0	0	0	0	0	1	1
	0	0	0	1	1	1	1			F1-DMSO	0.01	0.03	0.05	0.1	0.2	0.3	0.4
	0	0	1	1	1	1	1			group1	0	0	0.125	0.25	0.625	1	1
	0	0	0	0	1	1	1			group2	0	0.125	0.25	0.625	0.625	1	1
	0	0	0.125	0.25	0.625	1	1	group1		group3	0	0	0.0909091	0.454545	0.818182	0.909091	1
	0	0	1	1	1	1	1
	0	0	0	1	1	1	1
	0	0	0	0	0	1	1			mean (%)	0	0.0625	0.170455	0.539773	0.721591	0.954545	1
	0	0	0	1	1	1	1			SEM (%)	0	0.0625	0.0795455	0.0852273	0.0965909	0.0454545	0
	0	1	1	1	1	1	1			number	3	3	3	3	3	3	3
	0	0	0	0	0	1	1
	0	0	0	0	0	1	1
	0	0	0	1	1	1	1				1	2	3
	0	0.125	0.25	0.625	0.625	1	1	group2		a	-1.76813	-1.13862	-1.29276
	0	0	0	0	0	0	1			b	-0.02717	-0.069494	-0.061598
	0	0	0	0	1	1	1			c	1.6639	1.06858	1.12886
	0	0	0	0	1	1	1
	0	0	0	1	1	1	1			y=0.5 (S50)	15.3899	9.99259	11.6988
	0	0	0	1	1	1	1
	0	0	0	0	1	1	1
	0	0	0	1	1	1	1
	0	0	1	1	1	1	1
	0	0	0	0	1	1	1
	0	0	0	0	0	1	1
	0	0	0	1	1	1	1
	0	0	0.0909091	0.454545	0.818182	0.909091	1	group3
F1-EED226	0	1	1	1	1	1	1
	0	0	0	0	1	1	1
	0	0	0	1	1	1	1
	0	1	1	1	1	1	1
	0	0	0	1	1	1	1
	1	1	1	1	1	1	1			F1-EED226	0.01	0.03	0.05	0.1	0.2	0.3	0.4
	1	1	1	1	1	1	1			group1	0.222222	0.444444	0.444444	0.777778	1	1	1
	0	0	0	0	1	1	1			group2	0.1	0.4	0.8	0.9	1	1	1
	0	0	0	1	1	1	1			group3	0.285714	0.428571	0.714286	0.857143	1	1	1
	0.222222	0.444444	0.444444	0.777778	1	1	1	group1
	0	0	1	1	1	1	1
	0	1	1	1	1	1	1			mean (%)	0.192857	0.414286	0.757143	0.878571	1	1	1
	0	0	1	1	1	1	1			SEM (%)	0.0928571	0.0142857	0.0428571	0.0214286	0	0	0
	0	1	1	1	1	1	1			number	3	3	3	3	3	3	3
	0	1	1	1	1	1	1
	1	1	1	1	1	1	1
	0	0	0	1	1	1	1
	0	0	1	1	1	1	1				1	2	3
	0	0	0	0	1	1	1			a	-0.918461	-1.22825	-0.897022
	0	0	1	1	1	1	1			b	-0.120774	-0.288338	-0.187641
	0.1	0.4	0.8	0.9	1	1	1	group2		c	1.03324	1.00015	1.00762
	0	1	1	1	1	1	1
	0	0	1	1	1	1	1			y=0.5 (S50)	4.50204	3.11594	3.03428
	0	0	0	0	1	1	1
	0	0	0	1	1	1	1
	1	1	1	1	1	1	1
	1	1	1	1	1	1	1
	0	0	1	1	1	1	1
	0.285714	0.428571	0.714286	0.857143	1	1	1	group3
F1-A395	0	0	1	1	1	1	1
	1	1	1	1	1	1	1
	1	1	1	1	1	1	1			F1-A395	0.01	0.03	0.05	0.1	0.2	0.3	0.4
	0	0	0	1	1	1	1			group1	0.222222	0.333333	0.666667	0.888889	0.888889	1	1
	0	0	1	1	1	1	1			group2	0.166667	0.333333	0.333333	0.833333	1	1	1
	0	1	1	1	1	1	1			group3	0.222222	0.333333	0.666667	0.888889	1	1	1
	0	0	1	1	1	1	1
	0	0	0	0	0	1	1
	0	0	0	1	1	1	1			mean (%)	0.194444	0.333333	0.5	0.861111	1	1	1
	0.222222	0.333333	0.666667	0.888889	0.888889	1	1	group1		SEM (%)	0.0277778	0	0.166667	0.0277778	0	0	0
	0	1	1	1	1	1	1			number	3	3	3	3	3	3	3
	1	1	1	1	1	1	1
	0	0	0	1	1	1	1
	0	0	0	1	1	1	1				1	2	3
	0	0	0	1	1	1	1			a	-0.97041	-1.04248	-1.00834
	0	0	0	0	1	1	1			b	-0.192332	-0.123379	-0.186502
	0.166667	0.333333	0.333333	0.833333	1	1	1	group2		c	0.983217	1.04226	1.0151
	0	0	0	1	1	1	1
	1	1	1	1	1	1	1			y=0.5 (S50)	3.62526	5.29754	3.60158
	0	0	0	1	1	1	1
	0	0	1	1	1	1	1
	1	1	1	1	1	1	1
	0	0	1	1	1	1	1
	0	0	1	1	1	1	1
	0	0	0	0	1	1	1
	0	1	1	1	1	1	1
	0.222222	0.333333	0.666667	0.888889	1	1	1	group3

## Sheet: Figure4-C
Figure 4-C
	WT-DMS0	F0-DMSO	F0-EED226
1	1	1	1
2	0	0	0
3	1	0	0		5 flies/group
4	0	0	0			WT-DMS0	F0-DMSO	F0-EED226
5	1	0	1		group1	0.6	0.2	0.4
6	1	0	0		group2	0.8	0.4	0.4
7	0	0	1		group3	0.8	0	0.8
8	1	1	0		group4	0.6	0.4	0.6
9	1	0	0		group5	0.8	0.4	0.4
10	1	1	1		group6	0.8	0.2	0.6
11	1	0	1		group7	0.6	0.2	0.4
12	0	0	0		group8	0.6	0.4	0.2
13	1	0	1		group9	0.6	0.2	0.6
14	1	0	1		mean (%)	68.8889	26.6667	48.8889
15	1	0	1		SEM (%)	3.51364	4.71405	5.87945
16	0	0	0		number	9	9	9
17	1	1	1
18	0	1	1
19	1	0	1
20	1	0	0
21	0	1	0
22	1	0	1
23	1	0	1
24	1	1	0
25	1	0	0
26	1	0	0
27	1	0	1
28	1	1	1
29	0	0	0
30	1	0	1
31	1	0	0
32	1	0	0
33	0	0	1
34	1	1	1
35	0	0	0
36	1	1	0
37	0	0	1
38	1	0	0
39	0	0	0
40	1	1	0
41	1	0	1
42	0	0	1
43	1	0	1
44	0	0	0
45	1	1	0

## Sheet: Figure4-D
Figure 4-D
WT-DMS0	F1-DMSO	F2-DMSO	F1-EED226	F2-EED226
1	0	0	1	1
0	0	0	0	1			5 flies/group
1	1	1	1	0			WT-DMS0	F1-DMSO	F2-DMSO	F1-EED226	F2-EED226
0	0	0	1	0		group1	0.6	0.2	0.2	0.8	0.6
1	0	0	1	1		group2	0.8	0.4	0.6	0.8	0.8
1	0	1	1	0		group3	0.8	0.6	0.4	1	0.8
0	1	1	1	1		group4	0.6	0.2	0.2	0.8	0.6
1	0	0	0	1		group5	0.8	0.6	0.6	0.8	0.6
1	0	1	1	1		group6	0.8	0.4	0.4	0.8	0.8
1	1	0	1	1		group7	0.6	0.2	0.6	0.6	0.6
1	1	0	1	1		group8	0.6				0.8
0	0	1	1	1		group9	0.6
1	0	0	1	0		mean (%)	68.8889	37.1429	42.8571	80	70
1	1	1	1	1		SEM (%)	3.51364	6.80136	6.80136	4.36436	3.77964
1	1	0	1	1		number	9	7	7	7	8
0	0	0	1	0
1	0	0	1	0
0	1	1	0	1
1	0	0	1	1
1	0	0	1	1
0	0	1	1	1
1	1	0	0	0
1	1	1	1	1
1	0	0	1	0
1	1	1	1	1
1	1	0	1	1
1	0	0	1	1
1	0	1	1	1
0	1	0	0	0
1	0	1	1	1
1	0	0	1	0
1	0	1	0	1
0	0	1	1	1
1	1	0	1	0
0	0	1	0	1
1				1
0				1
1				0
0				1
1				1
1
0
1
0
1

## Sheet: Figure4-E
Figure 4-E
middle							left
ND+DMSO	F1+DMSO	F1+EEDi					ND+DMSO	F1+DMSO	F1+EEDi
0.022038	0.015549	-0.02487					0.151562	0.0372409	0.239313
0.058485	0.003284	-0.01157					0.224289	0.27129	0.18947
0.044641	0.0119	0.004929					0.294817	0.119599	0.242809
0.035532	-0.00492	-0.01324					0.115609	0.190563	0.227072
0.030935	0.003325	-0.0433					0.301059	0.153457	0.306354
0.436913	0.011859	-0.01125					0.372955	0.126385	0.22385
0.188064	0.025235	-0.01333					0.357406	0.0481128	0.271031
0.215133	-0.01886	0.011643					0.272291	0.161913	0.191492
0.116287	0.024428	-0.02872					0.561032	0.152815	0.282929
0.108252	-0.00177	-0.00326					0.495383	0.139028	0.265425
0.06393	0.009853	-0.02448					0.504903	0.124964	0.195651
0.324047	0.007416	-0.01155						0.119781	0.24493
0.28547	-0.00708	-0.05443						0.139094	0.541046
0.164573	-0.01001	0.011137						0.15295	0.393561
0.074603	0.011384	-0.00921
0.142118	0.00947	-0.00959
0.161308	-0.01634	-0.02421
0.160436	-0.0218	-0.04459
0.144833	-0.00233	-0.02936
0.155322	0.002599	-0.11181
0.103981	0.010506	-0.02677
0.058987	0.010008	0.019577
0.062665	-0.00695	-0.00048
0.019717	0.017039	-0.00454
0.0252	0.024387	-0.01471
-0.01488	-0.01785	-0.02285
-0.00301	-0.02568	-0.02706
0.00353	-0.02477	-0.00647
-0.09103	-0.00514	-0.02596
-0.04453	-0.02792	-0.01745
-0.05053	-0.03143	-0.01262
-0.06006	-0.01252	0.125629
-0.00481	-0.00616	0.195759
-0.04471	0.026403	0.282929
-0.03507	-0.02592	0.089616
-0.07393	-0.02224	0.034537
-0.06571	-0.01608	0.044547
-0.0657	-0.00735	0.03364
-0.04897	9.02e-05	0.039961
-0.0584	-0.03965	0.035885
-0.05212	0.032378	0.032839
-0.04923	-0.00806	0.038337
-0.05465	-0.0116	0.006543
-0.06332	0.008314	0.009115
-0.04847	0.014622	0.024207
-0.05433	0.005666	0.013617
-0.04778	-0.00393	0.003917
-0.04919	0.053331	0.008086
-0.07282	0.01128	0.015862
-0.04461	-0.022	0.007476
-0.04479	0.018113	0.028052
-0.06761	-0.00626	-0.00496
-0.08287	0.000862	0.000859
-0.07644	-0.02132	-0.00379
-0.04362	0.104417	-0.02031
-0.05762	0.100354	0.013427
-0.05553	0.12671	-0.00375
-0.0384	0.115477	-0.0052
-0.07945	0.103426	0.022746
-0.07062	0.02605	-0.00063
-0.05101	0.006555	0.011849
-0.05757	-0.00408	-0.01011
-0.05507	-0.00123	-0.01286
-0.0191	0.018151	-0.02941
0.34722	-0.01443	-0.00963
0.561032	-0.00603	-0.0212
0.34141	0.000377	-0.03706
0.258505	-0.00666	-0.02533
0.198986	0.019065	0.011261
0.160889	-0.01578	-0.00473
0.161184	-0.04583	-0.02502
0.200633	-0.02185	-0.00551
0.075458	-0.0277	-0.01828
0.127126	-0.00909	-0.0136
0.125779	-0.01849	-0.02896
0.139271	-0.00511	-0.0615
0.075696	0.00086	-0.06942
0.051906	-0.02106	-0.05248
0.037112	-0.01598	0.051565
0.004864	-0.01174	0.126579
-0.00756	0.003333	0.128778
-0.00706	0.000763	0.125406
-0.04176	-0.00345	0.134739
-0.03716	-0.03753	0.197218
-0.04899	-0.03699	0.052357
-0.06581	0.009582	-0.00329
-0.03065	-0.00082	0.019316
-0.05403	-0.02564	-0.0096
-0.05231	-0.03844	-0.02539
-0.05768	-0.04366	-0.00755
-0.0719	-0.02813	-0.01105
-0.06294	-0.04939	0.017716
-0.07307	-0.02711	0.001449
-0.05456	-0.00798	-0.00334
-0.05746	-0.00634	0.001535
-0.06057	-0.01491	-0.01357
-0.04322	-0.0294	-0.0361
-0.10034	-0.02508	-0.00753
-0.06936	0.118522	-0.03213
-0.05958	0.146059	-0.00258
-0.07709	0.152815	-0.03411
-0.08323	0.130509	-0.00351
-0.06154	0.035412	-0.03984
-0.06618	0.016836	-0.04676
-0.06826	-0.00164	-0.03709
-0.0729	-0.02787	-0.03558
-0.06346	-0.02233	-0.02136
-0.07075	0.006956	-0.03486
-0.05576	0.013804	-0.03745
-0.06343	-0.00812	-0.00819
-0.05607	0.003221	-0.04455
-0.0688	-0.02131	-0.0006
-0.06769	-0.0131	-0.04713
-0.05735	-0.03666	-0.01033
-0.0686	-0.02717	-0.03639
-0.05268	-0.01829	-0.01835
-0.05225	-0.02457	-0.02571
-0.07222	-0.01692	-0.03502
-0.07065	0.004706	-0.04776
-0.07375	-0.03774	-0.03107
-0.08004	-0.01978	-0.01621
-0.06449	-0.01572	0.023993
0.007296	-0.01782	0.123624
0.304051	-0.01368	0.138027
0.205772	-0.03073	0.122648
0.184916	-0.01489	0.155693
0.087516	-0.01595	0.119285
0.176611	-0.02527	0.130129
-0.05865	-0.03259	0.129954
-0.10141	-0.03911	0.113898
-0.1006	-0.02342	0.106428
0.046905	-0.01051	0.134549
0.092139	-0.03997	0.080778
0.102042	-0.02968	0.047053
0.058819	-0.01838	0.031033
0.046944	-0.02632	0.005147
0.052701	0.005207	0.004193
0.186685	-0.01805	-0.01055
0.045525	-0.01727	0.008114
0.035647	-0.0191	0.005877
0.010094	0.010506	-0.01975
0.025168	0.031228	-0.01928
-0.0531	0.036781	-0.01882
-0.01665	-0.0072	-0.01171
-0.02236	0.014502	-0.00347
-0.06373	0.109048	0.000218
-0.03701	-0.00029	0.000482
-0.04327	-0.01838	-0.01819
-0.08126	-0.02398	-0.02849
-0.05692	-0.0279	-0.01107
-0.06453	0.008822	-0.0229
-0.07481	-0.02502	-0.03453
-0.07518	-0.02385	-0.01765
-0.0665	0.005661	-0.01869
-0.06184	-0.0031	-0.04003
-0.09136	-0.00791	-0.022
-0.08192	-0.05583	-0.02446
-0.09425	-0.03567	-0.05791
-0.09818	-0.03454	-0.06476
-0.09583	-0.058	-0.05053
-0.09314	-0.02374	-0.0419
-0.10342	-0.03714	-0.05489
-0.07502	-0.01276	-0.04399
-0.09403	-0.01903	-0.07585
-0.10118	-0.02528	-0.01875
-0.12259	-0.07718	-0.04271
-0.0758	-0.026	-0.0396
-0.09554	-0.07257	-0.06882
-0.0796	-0.03889	-0.04955
-0.09471	-0.04567	-0.04009
-0.07537	-0.03831	-0.0699
-0.07215	-0.03762	-0.06093
-0.0835	-0.03763	-0.04387
-0.08029	-0.03212	-0.0679
-0.09053	-0.01009	-0.04758
-0.06897	-0.03254	-0.06896
-0.062	-0.03638	-0.04937
-0.06773	-0.01602	-0.07276
-0.0702	-0.02589	-0.07185
-0.07503	-0.02254	-0.07248
