# Supplementary material for: Exposure to high-sugar diet induces transgenerational changes in sweet sensitivity and feeding behavior via H3K27me3 reprogramming
Source: eLife. 2023 Sep 12;12:e85365. doi: 10.7554/eLife.85365 (PMC10558205; doi:10.7554/eLife.85365)
Supplement: Figure 5—figure supplement 1—source data 1. [file elife-85365-fig5-figsupp1-data1.xlsx]

## Sheet: Figure5-S1 C
Figure 5—figure supplement 1 C
15 flies/group
NF	F0
1	0
0.7	0.1
1.3	0.3

## Sheet: Figure5-S1 D
	Figure 5-figure supplement1 D
15 flies/group
ND	F1	F2
0.942231	0.535415	1.28392
1.31504	0.504058	1.29016
0.807055	0.610192	0.706217
1.06285	0.55426	1.09039
0.861813	0.847233	1.52575
1.09173	0.896084	0.924553
0.941576	0.777479	1.12964
1.64391	0.658095
0.646051
