# Supplementary material for: Exposure to high-sugar diet induces transgenerational changes in sweet sensitivity and feeding behavior via H3K27me3 reprogramming
Source: eLife. 2023 Sep 12;12:e85365. doi: 10.7554/eLife.85365 (PMC10558205; doi:10.7554/eLife.85365)
Supplement: Figure 5—figure supplement 2—source data 1. [file elife-85365-fig5-figsupp2-data1.xlsx]

## Sheet: Figure5-S2 B
Figure 5—figure supplement 2 B
PTX1			GATAe			nub
15 flies/group			15 flies/group			15 flies/group
NF	F0		NF	F0		NF	F0
1.01238	0.817337		1.57895	0.789474		1.06909	0.621818
0.98452	1.17957		1.26316	3.47368		0.927273	0.927273
1.0031	1.02167		0.157895	0		1.00364	0.578182
