# Supplementary material for: Exposure to high-sugar diet induces transgenerational changes in sweet sensitivity and feeding behavior via H3K27me3 reprogramming
Source: eLife. 2023 Sep 12;12:e85365. doi: 10.7554/eLife.85365 (PMC10558205; doi:10.7554/eLife.85365)
Supplement: Figure 5—source data 1. [file elife-85365-fig5-data1.xlsx]

## Sheet: Figure5 E
Figure 5-E
15 flies/group
ND	F1
0.72543	0.113493
0.088953	0
2.18562	0.353002

## Sheet: Figure5 F
Figure 5-F
15 flies/group			15 flies/group
NF	F0		ND	F1	F2
1.06653	0.685185		1.06653	0.514241	0.614681
0.715374	1.33598		0.715374	0.416071	0.373447
1.31067	1.05997		1.31067	0.54365	0.552555

## Sheet: Figure 5-G
Figure 5-G
15 flies/group			15 flies/group			15 flies/group
Mat-tub-GAL4>			Mat-tub-GAL4>UAS E(z) RNAi			UAS E(z) RNAi
NF	F1		NF	F1		NF	F1
1.04415	0.803069		0.73693	1.0276		0.987202	1.07975
0.77511	0.622578		1.04746	0.88		1.39678	1.59786
1.23559	0.618811		1.29549	1.4679		0.725214	1.13213
1.36802	0.745531		0.972479	1.00853		1.31675	0.946837
0.97779	0.870531		1.07405	1.42337		0.780244	1.17894
0.747588	0.873437		0.957408			0.973343	1.48568

## Sheet: Figure5-H
Figure 5-H
8-12 flies/group
gr5a>cad	0.01	0.03	0.05	0.1	0.2	0.3	0.4			0.01	0.03	0.05	0.1	0.2	0.3	0.4
	0	0	0	0	1	1	1		1	0	0	0.0909091	0.272727	0.636364	0.818182	0.818182
	0	0	0	0	0	0	0		2	0	0.1	0.3	0.4	0.6	0.9	1
	0	0	0	0	0	0	0		3	0	0	0.2	0.4	0.5	0.6	0.7
	0	0	0	0	1	1	1		4	0.0909091	0.0909091	0.181818	0.272727	0.454545	0.727273	0.727273
	0	0	0	0	0	1	1		5
	0	0	1	1	1	1	1		average	0.0227273	0.0477273	0.193182	0.336364	0.547727	0.761364	0.811364
	0	0	0	1	1	1	1		SEM	0.0227273	0.0276178	0.0428617	0.0367405	0.0423769	0.0643226	0.0677639
	0	0	0	0	1	1	1		NUM	4	4	4	4	4	4	4
	0	0	0	0	1	1	1
	0	0	0	0	0	1	1
	0	0	0	1	1	1	1				1	2	3	4
group1	0	0	0.0909091	0.272727	0.636364	0.818182	0.818182			a	-1.16901	-1.32472	-0.78825	-1.15834
	0	0	0	0	1	1	1			b	-0.046666	-0.035947	-0.080693	-0.025008
	0	0	1	1	1	1	1			c	1.05085	1.31562	0.697493	1.19279
	0	0	0	1	1	1	1
	0	0	0	0	0	1	1			y=0.5	16.1243	13.4923	17.1528	20.5539
	0	1	1	1	1	1	1
	0	0	0	0	0	0	1
	0	0	1	1	1	1	1
	0	0	0	0	0	1	1
	0	0	0	0	1	1	1
	0	0	0	0	0	1	1
group2	0	0.1	0.3	0.4	0.6	0.9	1
	0	0	1	1	1	1	1
	0	0	0	0	0	0	0
	0	0	0	0	0	0	0
	0	0	0	0	0	0	1
	0	0	0	0	0	1	1
	0	0	0	0	1	1	1
	0	0	1	1	1	1	1
	0	0	0	1	1	1	1
	0	0	0	1	1	1	1
	0	0	0	0	0	0	0
group3	0	0	0.2	0.4	0.5	0.6	0.7
	0	0	0	0	0	1	1
	0	0	0	1	1	1	1
	1	1	1	1	1	1	1
	0	0	0	0	1	1	1
	0	0	0	0	0	1	1
	0	0	1	1	1	1	1
	0	0	0	0	0	0	0
	0	0	0	0	0	0	0
	0	0	0	0	1	1	1
	0	0	0	0	0	1	1
	0	0	0	0	0	0	0
group4	0.0909091	0.0909091	0.181818	0.272727	0.454545	0.727273	0.727273
cad	0.01	0.03	0.05	0.1	0.2	0.3	0.4			0.01	0.03	0.05	0.1	0.2	0.3	0.4
	0	0	1	1	1	1	1		1	0.2	0.3	0.5	0.8	0.8	1	1
	1	1	1	1	1	1	1		2	0	0.4	0.5	0.9	0.9	1	1
	0	0	0	1	1	1	1		3	0.111111	0.333333	0.555556	0.777778	0.888889	1	1
	0	0	1	1	1	1	1		4	0.25	0.375	0.5	0.625	0.875	1	1
	0	0	0	0	0	1	1		5
	0	1	1	1	1	1	1		average	0.0227273	0.352083	0.513889	0.775694	0.865972	1	1
	0	0	0	0	0	1	1		SEM	0.0548743	0.0221461	0.0138889	0.05683	0.0225775	0	0
	0	0	0	1	1	1	1		NUM	4	4	4	4	4	4	4
	1	1	1	1	1	1	1
	0	0	0	1	1	1	1
group1	0.2	0.3	0.5	0.8	0.8	1	1				1	2	3	4
	0	1	1	1	1	1	1			a	-0.915213	-1.20596	-1.02303	-0.863335
	0	1	1	1	1	1	1			b	-0.124061	-0.215549	-0.159782	-0.076743
	0	0	0	1	1	1	1			c	0.985883	0.981751	0.984475	1.05883
	0	0	1	1	1	1	1
	0	0	0	1	1	1	1			y=0.5	5.10385	4.25706	4.678	5.66772
	0	1	1	1	1	1	1
	0	0	0	1	1	1	1
	0	0	0	0	0	1	1
	0	0	0	1	1	1	1
	0	1	1	1	1	1	1
group2	0	0.4	0.5	0.9	0.9	1	1
	0	0	0	1	1	1	1
	0	0	0	1	1	1	1
	0	0	0	0	0	1	1
	0	0	1	1	1	1	1
	1	1	1	1	1	1	1
	0	1	1	1	1	1	1
	0	0	0	0	1	1	1
	0	0	1	1	1	1	1
	0	1	1	1	1	1	1
group3	0.111111	0.333333	0.555556	0.777778	0.888889	1	1
	1	1	1	1	1	1	1
	0	0	0	0	1	1	1
	0	0	0	0	1	1	1
	0	0	0	1	1	1	1
	0	1	1	1	1	1	1
	0	0	1	1	1	1	1
	0	0	0	0	0	1	1
	1	1	1	1	1	1	1
group4	0.25	0.375	0.5	0.625	0.875	1	1
	0.01	0.03	0.05	0.1	0.2	0.3	0.4			0.01	0.03	0.05	0.1	0.2	0.3	0.4
	0	0	0	1	1	1	1		1	0	0.125	0.125	0.625	0.875	1	1
	0	0	0	0	0	1	1		2	0	0.333333	0.444444	0.666667	1	1	1
	0	0	0	0	1	1	1		3	0.111111	0.111111	0.333333	0.888889	1	1	1
	0	0	0	1	1	1	1		4
	0	1	1	1	1	1	1		5
	0	0	0	0	1	1	1		average	0.0227273	0.189815	0.300926	0.726852	0.958333	1	1
	0	0	0	1	1	1	1		SEM	0.037037	0.0718712	0.0936285	0.0819065	0.0416667	0	0
	0	0	0	1	1	1	1		NUM	3	3	3	3	3	3	3
group1	0	0.125	0.125	0.625	0.875	1	1
	0	0	0	0	1	1	1
	0	0	0	1	1	1	1				1	2	3
	0	0	0	0	1	1	1			a	-1.2369	-1.13144	-1.20057
	0	1	1	1	1	1	1			b	-0.084753	-0.135164	-0.134605
	0	0	0	0	1	1	1			c	1.07876	1.02229	1.04692
	0	1	1	1	1	1	1
	0	0	0	1	1	1	1			y=0.5	8.96116	5.71914	5.8411
	0	1	1	1	1	1	1
	0	0	1	1	1	1	1
group2	0	0.333333	0.444444	0.666667	1	1	1
	0	0	0	1	1	1	1
	1	1	1	1	1	1	1
	0	0	0	1	1	1	1
	0	0	0	1	1	1	1
	0	0	1	1	1	1	1
	0	0	0	1	1	1	1
	0	0	0	0	1	1	1
	0	0	0	1	1	1	1
	0	0	1	1	1	1	1
group3	0.111111	0.111111	0.333333	0.888889	1	1	1
