# Supplementary material for: Exposure to high-sugar diet induces transgenerational changes in sweet sensitivity and feeding behavior via H3K27me3 reprogramming
Source: eLife. 2023 Sep 12;12:e85365. doi: 10.7554/eLife.85365 (PMC10558205; doi:10.7554/eLife.85365)
Supplement: Supplementary file 1. — The cycle 10–12 embryos of HSD-F1 vs. normal diet (ND) flies were collected and subjected to chromatin-immunoprecipitation followed by sequencing (ChIP-seq) analysis. The difference peaks of ChIP-seq data were found by using model-based analysis of ChIP-seq 2 (MACS2) with the options ‘bdgdiff’. The cutoff is log10 likelihood ratio >3 (n=2 biological replicates, each containing 1000 embryos). [file elife-85365-supp1.xlsx]

## Sheet: upregulated regions-re1
upregulated regions-re1
chromosome	start	end	log10 likelihood ratio
chr2L	263	550	9.83336
chr2L	3936	4245	5.50545
chr2L	583145	583446	10.8405
chr2L	584211	584473	5.98616
chr2L	589249	589564	10.9833
chr2L	592244	592640	3.91513
chr2L	593064	594339	7.68863
chr2L	595062	595513	7.16587
chr2L	595808	596013	3.9883
chr2L	596130	596859	8.31534
chr2L	597132	597562	8.09358
chr2L	597694	597894	5.99907
chr2L	1950731	1951202	6.57455
chr2L	1955717	1955917	5.2015
chr2L	1957266	1957572	21.0389
chr2L	1962845	1963239	9.85884
chr2L	1964310	1964793	8.89304
chr2L	1965841	1966058	9.38015
chr2L	1966938	1967199	7.75919
chr2L	1967362	1967611	20.8743
chr2L	2446176	2446462	28.0216
chr2L	3579144	3579489	7.69483
chr2L	3595311	3595519	8.99493
chr2L	3604869	3605465	12.4867
chr2L	3609117	3609400	11.7223
chr2L	3610388	3610920	8.7267
chr2L	3611790	3612080	7.95875
chr2L	3613042	3613345	6.47805
chr2L	3815488	3815751	12.6669
chr2L	3826065	3826894	7.89598
chr2L	3837368	3837744	9.34066
chr2L	3837896	3838559	5.30791
chr2L	3857996	3858219	27.7013
chr2L	5396755	5396962	7.64058
chr2L	5404803	5405154	6.36175
chr2L	5406972	5407267	11.2957
chr2L	6548647	6548932	8.12398
chr2L	6822355	6822844	15.0349
chr2L	6832289	6832500	14.2805
chr2L	6835926	6836159	11.0495
chr2L	7304402	7304695	16.959
chr2L	8824388	8824588	8.66476
chr2L	8826817	8827161	8.07796
chr2L	8827930	8828465	8.24666
chr2L	9580320	9580542	12.1642
chr2L	9581190	9581447	12.9531
chr2L	9609288	9609534	6.57266
chr2L	12005237	12006071	12.0103
chr2L	12009098	12009375	6.11163
chr2L	12084150	12084538	11.6887
chr2L	12087320	12087548	9.37101
chr2L	12089231	12089506	5.95887
chr2L	15109970	15110241	18.934
chr2L	16480426	16480657	5.51771
chr2L	16484198	16484591	6.54706
chr2L	18733919	18734215	7.78698
chr2L	18779833	18780242	10.209
chr2L	18880612	18880843	4.44735
chr2L	18881793	18882216	8.9997
chr2L	18886071	18886455	12.0488
chr2L	20769011	20769228	12.2144
chr2L	20771263	20771603	8.90327
chr2L	20775503	20775738	4.98989
chr2L	20777946	20778294	6.44884
chr2L	20781045	20781537	6.65426
chr2L	20781770	20782089	5.11358
chr2L	23512827	23513585	35.1445
chr2R	870194	870477	21.6506
chr2R	1825725	1826652	32.8666
chr2R	4863910	4864404	37.8837
chr2R	4868346	4868697	24.3649
chr2R	7421308	7421731	9.8428
chr2R	8031839	8032249	11.0272
chr2R	8047545	8047960	9.87615
chr2R	9195343	9196189	12.6866
chr2R	9973658	9974044	19.8784
chr2R	9974157	9974670	17.457
chr2R	9974846	9975557	8.88081
chr2R	9977066	9978764	6.89054
chr2R	9979570	9980084	13.9588
chr2R	9981006	9981646	9.53303
chr2R	9981860	9982060	5.32594
chr2R	9982679	9983244	6.58696
chr2R	9983460	9983670	6.23175
chr2R	9985054	9985501	12.4422
chr2R	9986271	9986819	6.99203
chr2R	11475999	11476377	5.34069
chr2R	11524704	11525035	8.14469
chr2R	11526582	11526969	4.54517
chr2R	11527080	11527699	5.35132
chr2R	11534156	11534396	7.23705
chr2R	11538786	11539205	15.3622
chr2R	11551564	11551947	8.60124
chr2R	11561582	11562032	6.66178
chr2R	11562205	11562548	13.8319
chr2R	11564531	11564744	10.4702
chr2R	11566352	11566621	4.86393
chr2R	12884930	12885270	8.42577
chr2R	12891487	12891691	7.50314
chr2R	12892709	12892911	4.99241
chr2R	12900329	12900618	12.801
chr2R	12902655	12902883	7.21224
chr2R	12905145	12905347	9.38219
chr2R	12907949	12908180	11.7951
chr2R	12908715	12909109	10.7181
chr2R	12953926	12954250	6.02595
chr2R	12954844	12955130	7.21016
chr2R	12987230	12987483	10.5771
chr2R	13002645	13003236	10.8589
chr2R	13008499	13008727	15.3095
chr2R	13008858	13009061	28.5137
chr2R	13024025	13024307	9.38496
chr2R	13040374	13040995	6.92593
chr2R	14201670	14202043	15.2948
chr2R	14207200	14207607	8.66975
chr2R	14460099	14460305	8.67049
chr2R	14462622	14463138	7.63517
chr2R	14463468	14463731	10.8768
chr2R	14464198	14464874	8.90558
chr2R	14796910	14797173	6.92784
chr2R	14798245	14798656	10.2461
chr2R	15827653	15827904	17.3592
chr2R	20909967	20910185	6.90607
chr2R	20912465	20913105	8.1944
chr2R	20917078	20917375	7.60818
chr2R	20922658	20923105	27.0713
chr2R	20960391	20960621	6.61654
chr2R	20968404	20968608	10.3893
chr2R	22239054	22239267	17.3442
chr2R	22868432	22868726	34.2292
chr2R	22869225	22869425	9.98316
chr2R	23047129	23047637	9.21642
chr2R	23620103	23620386	19.422
chr2R	23631521	23631855	25.4956
chr2R	23635348	23635555	7.19408
chr2R	24806588	24806821	9.3454
chr2R	24809346	24809807	6.91461
chr2R	24811297	24811883	6.77469
chr2R	24817550	24817900	9.64659
chr2R	24819724	24819924	11.0726
chr2R	25051344	25051555	5.24868
chr2R	25064116	25064359	5.92904
chr3L	334	601	34.145
chr3L	370768	371155	10.1106
chr3L	373145	373345	8.62488
chr3L	376425	376667	6.28324
chr3L	379307	379575	11.1517
chr3L	383223	383427	12.361
chr3L	1363401	1363629	13.4626
chr3L	4160373	4160602	5.50825
chr3L	4162049	4162293	12.8631
chr3L	9005565	9005968	4.14674
chr3L	9009426	9009634	6.88266
chr3L	9012926	9013132	9.96274
chr3L	9018690	9018952	7.44964
chr3L	9020239	9020496	12.4084
chr3L	9027022	9027228	7.74033
chr3L	9029247	9029447	38.261
chr3L	9039008	9039346	17.4967
chr3L	11011710	11011910	9.13383
chr3L	11012688	11012905	7.73014
chr3L	11923217	11923503	10.9207
chr3L	12327409	12327803	7.24679
chr3L	12436780	12436983	7.88534
chr3L	12696553	12697010	7.83683
chr3L	13399761	13400146	8.39608
chr3L	13404701	13405074	5.47931
chr3L	14135500	14135744	6.32027
chr3L	14184412	14184620	13.9442
chr3L	14580147	14580543	10.9488
chr3L	19662983	19663324	10.1521
chr3L	19672830	19673037	6.79308
chr3L	20615391	20615778	20.3399
chr3L	20693647	20694115	9.85589
chr3L	20795021	20795223	9.34476
chr3L	20796039	20796267	5.05709
chr3L	21468067	21468294	8.10239
chr3L	21473051	21473465	16.874
chr3L	21477167	21477383	6.01218
chr3L	21478407	21478685	9.28763
chr3L	21583258	21583592	5.29776
chr3L	21586014	21586474	5.77641
chr3L	21595900	21596168	8.43164
chr3L	21601808	21602182	8.86317
chr3L	23113726	23114121	32.314
chr3L	23115693	23116181	30.2955
chr3L	23116476	23116968	30.8997
chr3L	25131308	25131662	37.2981
chr3L	25132763	25133029	24.6789
chr3L	25133867	25134413	34.0193
chr3R	3169961	3170357	31.6995
chr3R	4829299	4829530	9.66541
chr3R	4845519	4845842	7.67155
chr3R	4847363	4847683	12.4328
chr3R	4850305	4850661	9.09435
chr3R	4853288	4853959	10.621
chr3R	6677139	6677945	8.23069
chr3R	6679822	6680222	6.07064
chr3R	6739639	6739868	12.7289
chr3R	6783701	6783992	10.2298
chr3R	6789460	6789746	5.37707
chr3R	6790882	6791108	31.055
chr3R	6792377	6792926	6.79532
chr3R	6793443	6793852	10.2294
chr3R	6800895	6801309	8.79786
chr3R	6841282	6841537	5.0659
chr3R	6841681	6842076	7.11438
chr3R	6842947	6843182	10.9118
chr3R	6846643	6846844	4.26559
chr3R	6847011	6847235	4.7314
chr3R	6873211	6873551	4.67214
chr3R	6873976	6874233	6.39859
chr3R	6878526	6878732	10.6928
chr3R	6880354	6880720	10.2594
chr3R	6884003	6884212	8.33384
chr3R	6886898	6887218	5.84221
chr3R	6888795	6889095	7.56067
chr3R	6889598	6889979	13.2715
chr3R	6901268	6901500	15.0898
chr3R	6904227	6904517	8.99282
chr3R	6936716	6936929	15.2926
chr3R	6987560	6987882	8.25694
chr3R	7025895	7026116	10.3493
chr3R	7960469	7960673	16.8977
chr3R	7962672	7962872	19.6622
chr3R	8177089	8177336	16.6275
chr3R	8185621	8186326	8.8436
chr3R	8278234	8278680	8.90187
chr3R	8282008	8282220	9.10415
chr3R	8324806	8325153	23.2506
chr3R	8333034	8333434	8.49865
chr3R	10366917	10367243	7.95852
chr3R	11355406	11355935	16.9845
chr3R	12281860	12282080	6.48746
chr3R	12473245	12473484	17.8818
chr3R	13062276	13062476	4.76587
chr3R	13072735	13072979	4.36295
chr3R	13076217	13076490	13.5922
chr3R	13076686	13077250	6.38667
chr3R	13873441	13873876	10.6153
chr3R	13879759	13880057	12.1517
chr3R	13883905	13884105	9.86405
chr3R	13902407	13903306	8.24833
chr3R	13903595	13903969	10.7654
chr3R	15995473	15995728	13.7148
chr3R	15995956	15996166	7.17655
chr3R	16416640	16416846	6.71558
chr3R	16422251	16422632	7.97218
chr3R	16424170	16424515	7.23134
chr3R	16704174	16704379	10.2294
chr3R	16733032	16733284	4.67164
chr3R	16738663	16738992	14.2851
chr3R	16752299	16752499	4.65535
chr3R	16753601	16753807	8.85016
chr3R	16774244	16774711	17.0323
chr3R	16782370	16782678	26.4079
chr3R	16810246	16811024	8.42756
chr3R	16823620	16823843	7.25144
chr3R	16827206	16827478	5.98468
chr3R	16827749	16827962	11.6596
chr3R	16847493	16847738	9.98331
chr3R	16850540	16850758	23.9476
chr3R	16854472	16854776	11.8958
chr3R	16859263	16859574	5.12793
chr3R	16862042	16862497	6.11078
chr3R	16864337	16864755	9.46423
chr3R	16871418	16871709	7.21359
chr3R	16878503	16878706	7.3296
chr3R	16879443	16879663	5.77666
chr3R	16883771	16884271	8.06337
chr3R	16884537	16884976	8.78838
chr3R	16885312	16885718	6.41739
chr3R	16901852	16902249	5.66822
chr3R	16902776	16902998	8.86002
chr3R	16903520	16903721	13.315
chr3R	16905134	16905339	6.27691
chr3R	16909320	16909572	8.36856
chr3R	16911480	16911802	16.8338
chr3R	16915076	16915413	4.33406
chr3R	16916517	16916786	6.54114
chr3R	16920796	16921376	7.24124
chr3R	16929321	16929605	8.25243
chr3R	16931166	16931501	7.27568
chr3R	16932400	16933244	6.83244
chr3R	16936294	16936865	15.9533
chr3R	16939734	16940052	8.77743
chr3R	16940503	16940724	11.3786
chr3R	16941734	16942414	9.19093
chr3R	16944703	16944998	7.56332
chr3R	16945339	16945540	4.99666
chr3R	16945794	16946046	4.64847
chr3R	16947666	16948342	9.43351
chr3R	16949082	16949383	21.0983
chr3R	16949768	16950209	5.3349
chr3R	16952770	16953002	11.0092
chr3R	16954655	16954879	8.24473
chr3R	16961447	16961744	5.56074
chr3R	16962016	16962276	9.26296
chr3R	16962504	16962819	9.39693
chr3R	16963606	16964057	7.38577
chr3R	16964961	16965203	6.59484
chr3R	16967141	16967467	6.10535
chr3R	16970498	16970739	7.59079
chr3R	16972688	16972967	4.22375
chr3R	16974626	16975354	25.4697
chr3R	17559393	17560141	10.4326
chr3R	18236738	18236968	5.71561
chr3R	21380011	21380350	7.34059
chr3R	21389816	21390223	5.67906
chr3R	21390957	21391304	21.1993
chr3R	21430108	21430342	9.35462
chr3R	21432564	21432775	4.89613
chr3R	21433453	21433866	6.07766
chr3R	21436051	21436287	19.777
chr3R	21445124	21445995	9.11496
chr3R	21448864	21449417	11.6289
chr3R	21450390	21450693	17.8069
chr3R	21455993	21456792	4.28466
chr3R	21457325	21457546	6.08936
chr3R	21461841	21462045	5.09645
chr3R	21462148	21462398	7.73491
chr3R	21463576	21463798	7.12723
chr3R	21471672	21471885	5.43186
chr3R	21472661	21473087	18.4102
chr3R	21474428	21474700	7.36573
chr3R	21492846	21493137	20.7177
chr3R	21498167	21498440	11.8396
chr3R	21498955	21499170	8.90152
chr3R	21505413	21505682	7.29242
chr3R	21558617	21559000	9.51347
chr3R	21560660	21561110	11.7003
chr3R	23188925	23189125	19.2069
chr3R	23191873	23192124	37.368
chr3R	23197269	23197629	6.29644
chr3R	23201924	23202231	8.83426
chr3R	23206304	23206535	5.99015
chr3R	23211125	23211403	10.7717
chr3R	25081272	25081472	14.3869
chr3R	25082527	25082870	5.21463
chr3R	25083046	25083246	7.32753
chr3R	25095502	25095738	4.354
chr3R	28546278	28546478	4.25247
chr3R	28582607	28582936	5.76795
chr3R	28583441	28583681	6.22004
chr3R	28583791	28584760	19.7981
chr3R	29533951	29534160	23.8297
chr3R	29555215	29555614	10.106
chr3R	29556997	29557742	7.43444
chr3R	29693369	29693838	10.5134
chr3R	30275134	30275425	7.85253
chr3R	30279046	30279335	11.4772
chr3R	30768898	30769101	6.36806
chr3R	30769711	30770073	5.4998
chr3R	30770939	30771148	12.0519
chr3R	30773851	30774600	6.82857
chr3R	30782643	30782882	19.9911
chr3R	30784068	30784358	6.17275
chr3R	30784874	30785285	8.73161
chr3R	30850956	30851170	5.62098
chr3R	30852530	30854067	6.68912
chr3R	30866482	30866741	4.62936
chr3R	30910666	30910958	5.29146
chr3R	30913978	30914265	10.8697
chr3R	31062949	31063282	7.903
chr3R	32071753	32071979	6.57498
chrUn_CP007081v1	87893	88726	54.4887
chrUn_CP007088v1	19	268	25.8768
chrUn_CP007100v1	5808	6413	28.5941
chrUn_CP007120v1	18201	18415	22.3755
chrUn_CP007120v1	37360	39388	40.2691
chrUn_CP007120v1	40619	42398	38.8421
chrUn_CP007120v1	43483	44133	37.3869
chrUn_CP007120v1	44327	46339	40.2208
chrUn_CP007120v1	46716	47247	44.1554
chrUn_CP007120v1	47751	49066	46.9361
chrUn_CP007120v1	50302	50735	45.0095
chrUn_CP007120v1	53112	53412	30.0122
chrUn_CP007120v1	54047	54525	35.4012
chrUn_CP007120v1	55973	57899	40.8688
chrUn_CP007120v1	62914	63821	29.9035
chrUn_CP007120v1	65104	66989	38.2841
chrUn_CP007120v1	67662	67967	40.7356
chrUn_CP007120v1	68369	69565	46.6544
chrUn_CP007120v1	69768	70321	43.0097
chrUn_CP007120v1	70898	71433	50.8536
chrUn_CP007120v1	71628	73191	50.0564
chrUn_CP007120v1	73437	74981	39.8206
chrUn_CP007120v1	75318	76742	35.0935
chrUn_DS483746v1	3604	3817	12.8825
chrUn_DS483755v1	84	479	44.2104
chrUn_DS483762v1	6361	6684	38.7394
chrUn_DS483817v1	3798	3998	16.2851
chrUn_DS484007v1	158	582	25.4184
chrUn_DS484202v1	1075	1335	15.7165
chrUn_DS484234v1	2292	2512	16.9824
chrUn_DS484484v1	1427	2005	53.1691
chrUn_DS484663v1	167	406	24.2922
chrUn_DS484751v1	648	853	28.2454
chrUn_DS484756v1	308	705	36.7696
chrUn_DS484861v1	19	255	22.7243
chrUn_DS485031v1	993	1194	29.2849
chrUn_DS485249v1	147	369	31.03
chrUn_DS485255v1	542	853	29.4789
chrUn_DS485270v1	5	243	19.6495
chrUn_DS485339v1	133	336	20.3857
chrUn_DS485386v1	853	1080	27.2441
chrUn_DS485453v1	96	381	27.2109
chrUn_DS485462v1	560	1061	32.0096
chrUn_DS485509v1	897	1103	11.4392
chrUn_DS485808v1	122	490	24.292
chrUn_DS485808v1	675	978	33.0611
chrUn_DS485906v1	1	435	35.7317
chrUn_DS485991v1	575	856	30.2092
chrUn_DS485995v1	0	341	14.2293
chrUn_DS485995v1	672	884	19.0693
chrX	60395	60712	9.85166
chrX	91901	92127	7.47213
chrX	2428287	2428711	9.15995
chrX	4410444	4410693	5.36285
chrX	4413157	4413360	9.61998
chrX	4425890	4426131	10.028
chrX	5559457	5560078	13.9213
chrX	5561023	5561379	12.8801
chrX	5594618	5595031	7.70748
chrX	8632870	8633075	5.73453
chrX	8642466	8642776	8.85447
chrX	9728098	9728311	7.32122
chrX	17322985	17323215	28.7824
chrX	17768956	17769517	7.26747
chrX	18244531	18244739	6.4374
chrX	18245839	18246081	4.39673
chrX	19550382	19550748	11.8208
chrX	22362658	22362885	25.9813
chrX	23215701	23215909	37.2309
chrX	23216969	23217985	31.2986
chrX	23222179	23222688	33.1425
chrX	23226064	23226741	38.6706
chrX	23227833	23228631	32.0127
chrX	23391515	23392037	24.6699
chrX	23527026	23527231	25.6448
chrX_CP007103v1_random	19226	19472	24.3318
chrX_CP007104v1_random	2621	2844	19.3319
chrX_CP007104v1_random	4672	4964	24.1414
chrX_DS483843v1_random	85	414	21.077
chrX_DS483905v1_random	2964	3164	19.678
chrX_DS483926v1_random	2839	3118	22.9807
chrX_DS484101v1_random	2342	2598	45.7938
chrX_DS484131v1_random	1974	2228	31.4868
chrX_DS484219v1_random	2016	2308	34.732
chrX_DS484261v1_random	199	418	27.0983
chrX_DS484328v1_random	1054	1276	15.2946
chrX_DS484371v1_random	178	599	39.8911
chrX_DS484388v1_random	439	639	29.7711
chrX_DS484393v1_random	304	641	26.1169
chrX_DS484429v1_random	363	588	32.7288
chrX_DS484519v1_random	1298	1861	30.4455
chrX_DS484556v1_random	941	1163	20.7246
chrX_DS484610v1_random	597	849	34.1675
chrX_DS484644v1_random	156	404	30.3824
chrX_DS484724v1_random	1169	1389	29.126
chrX_DS484730v1_random	525	754	35.1831
chrX_DS484974v1_random	222	469	18.0347
chrX_DS484995v1_random	1031	1246	32.8381
chrX_DS485084v1_random	887	1124	41.5144
chrX_DS485111v1_random	203	476	17.638
chrX_DS485111v1_random	843	1081	27.9275
chrX_DS485126v1_random	187	510	16.3694
chrX_DS485172v1_random	865	1074	19.3881
chrX_DS485599v1_random	661	1016	26.6032
chrX_DS485647v1_random	163	443	29.8494
chrX_DS485672v1_random	554	929	19.9949
chrX_DS485855v1_random	629	855	36.8175
chrY	124335	124735	39.8127
chrY	200690	200901	11.2668
chrY	203423	203742	29.0003
chrY	652895	653268	16.5519
chrY	912882	913271	21.6202
chrY	988296	988561	18.3716
chrY	1020042	1020242	17.2856
chrY	1642143	1642581	36.0185
chrY	3560281	3560543	10.5302
chrY	3562352	3562634	28.7507
chrY_CP007112v1_random	12	307	35.4712

## Sheet: upregulated regions-re2
upregulated regions-re2
chromosome	start	end	log10 likelihood ratio
chr2L	592267	592483	4.30234
chr2L	593106	593393	5.69541
chr2L	593696	594348	6.83081
chr2L	596352	596659	3.61697
chr2L	596843	597297	7.14119
chr2L	598069	598271	9.89514
chr2L	1951862	1952424	6.34571
chr2L	1952725	1952960	5.53525
chr2L	1955664	1955878	6.06691
chr2L	1964567	1964793	8.7638
chr2L	1967009	1967209	10.7377
chr2L	1967701	1968051	15.9581
chr2L	1968224	1968424	5.78712
chr2L	1968577	1968836	11.0379
chr2L	1969154	1969470	6.49093
chr2L	3593298	3593498	9.72592
chr2L	3595203	3595443	4.72091
chr2L	3606993	3607332	7.05131
chr2L	3610601	3610839	4.60873
chr2L	3659862	3660153	6.66546
chr2L	3826222	3826722	4.55771
chr2L	3834016	3834324	9.88881
chr2L	3838384	3838629	7.07981
chr2L	5415495	5415732	6.03806
chr2L	5459275	5459554	5.80374
chr2L	5465273	5465488	11.0226
chr2L	6822203	6822408	7.53196
chr2L	6822645	6822997	7.99301
chr2L	6831363	6831905	8.7146
chr2L	8827108	8827516	5.10936
chr2L	9603796	9604108	6.54437
chr2L	9609945	9610284	17.5768
chr2L	12008412	12008790	7.759
chr2L	12009212	12009598	6.44174
chr2L	12084171	12084398	13.0606
chr2L	12087098	12087450	13.6288
chr2L	15109709	15110086	6.96243
chr2L	16484145	16484670	5.36746
chr2L	18780157	18780381	8.83003
chr2L	18793926	18794131	19.7294
chr2L	18882105	18882336	28.5109
chr2L	18883969	18884298	23.4284
chr2L	20771048	20771570	9.11454
chr2L	20781762	20782502	7.72357
chr2L	21898030	21898231	8.85087
chr2L	23238071	23238281	14.344
chr2L	23512827	23513596	26.458
chr2R	748753	748972	8.96466
chr2R	870199	870489	20.465
chr2R	1825720	1826658	19.2181
chr2R	4863953	4864451	27.9911
chr2R	4864728	4865116	15.3168
chr2R	4865954	4866267	16.1793
chr2R	4868410	4868690	20.8916
chr2R	5105857	5106175	9.74082
chr2R	7425291	7425493	6.34
chr2R	8021934	8022360	9.5301
chr2R	8028071	8028510	8.45725
chr2R	8031557	8031782	4.01758
chr2R	8032009	8032520	4.75945
chr2R	8034436	8034729	5.12734
chr2R	8047960	8048205	24.4949
chr2R	8050206	8050409	4.21328
chr2R	9195843	9196104	5.19251
chr2R	9973290	9973564	6.05327
chr2R	9975650	9975901	4.59214
chr2R	9977225	9977858	5.43209
chr2R	9978329	9978592	5.33761
chr2R	9979875	9980332	6.18221
chr2R	9980944	9981198	5.48723
chr2R	9981347	9981974	6.42449
chr2R	9983579	9983859	12.7169
chr2R	9984535	9984935	6.18744
chr2R	9985227	9985430	7.86349
chr2R	9985669	9986848	8.35306
chr2R	9987323	9987603	5.63013
chr2R	11480259	11480459	13.77
chr2R	11526620	11527470	6.56261
chr2R	11530696	11531027	5.05361
chr2R	11541451	11541686	9.48789
chr2R	11544318	11544622	11.7188
chr2R	11553228	11553464	15.1413
chr2R	11558102	11558361	6.41285
chr2R	11560975	11561195	6.98112
chr2R	11561457	11561809	6.20666
chr2R	12890570	12890904	13.2828
chr2R	12892680	12892939	11.8602
chr2R	12896650	12896899	7.03694
chr2R	12898106	12898336	8.51907
chr2R	12901134	12901377	15.6326
chr2R	12902804	12903004	20.4991
chr2R	12905201	12905645	5.69807
chr2R	12906905	12907107	4.97944
chr2R	12951046	12951267	8.4574
chr2R	12954499	12955058	6.46072
chr2R	13003004	13003274	24.9205
chr2R	13011715	13011962	12.7013
chr2R	13017087	13017319	6.57418
chr2R	14200391	14200644	9.568
chr2R	14201725	14201960	7.87673
chr2R	14203413	14203847	15.1065
chr2R	14206088	14206471	5.31048
chr2R	14207418	14207873	8.26873
chr2R	14455104	14455388	5.79413
chr2R	14463164	14463550	5.48047
chr2R	14464424	14464658	6.41199
chr2R	14479800	14480017	8.92323
chr2R	14798213	14798518	12.8647
chr2R	14812413	14812632	5.14178
chr2R	17821204	17821416	13.3227
chr2R	20908659	20909034	14.4609
chr2R	20912787	20912998	9.93802
chr2R	20916995	20917454	15.7092
chr2R	20955056	20955546	4.64243
chr2R	20958410	20958828	5.58376
chr2R	20959212	20959500	7.47766
chr2R	20960397	20960626	5.668
chr2R	22239877	22240103	4.57485
chr2R	22240607	22240867	4.44994
chr2R	22868488	22868708	7.18001
chr2R	22869617	22869926	6.37331
chr2R	23046541	23046980	8.24652
chr2R	23047995	23048198	8.9897
chr2R	23623413	23623848	9.17446
chr2R	23625082	23625360	4.92361
chr2R	23631615	23631905	10.3339
chr2R	23642986	23643188	6.51675
chr2R	24805996	24806248	7.13066
chr2R	24811520	24811985	7.15684
chr2R	24813083	24813314	5.50075
chr2R	24815276	24815528	10.7332
chr2R	24818799	24819203	6.87841
chr2R	24845821	24846061	6.24418
chr2R	24847655	24847895	6.99015
chr2R	24853916	24854172	7.94371
chr2R	25053382	25053584	7.03621
chr2R	25055536	25055774	32.5091
chr2R	25060432	25061189	8.37305
chr2R	25063397	25063948	7.77638
chr3L	376343	376657	7.95198
chr3L	379890	380096	11.2434
chr3L	1461865	1462177	12.3492
chr3L	1921449	1921896	8.16183
chr3L	4157311	4157608	5.25951
chr3L	4160341	4160680	6.39125
chr3L	6791177	6791697	16.113
chr3L	7948953	7949263	5.73733
chr3L	9006334	9006750	8.15369
chr3L	9009293	9009583	6.74325
chr3L	9014632	9014906	7.63846
chr3L	9037817	9038038	4.92161
chr3L	12435438	12435811	7.52377
chr3L	12469144	12469482	13.5236
chr3L	12584292	12584679	7.46147
chr3L	12686436	12686720	21.487
chr3L	12689965	12690166	7.31428
chr3L	12696615	12696912	18.8228
chr3L	13404674	13404920	9.5769
chr3L	14125674	14125887	6.51176
chr3L	14176151	14176426	5.19544
chr3L	14176993	14177254	5.56132
chr3L	14580647	14581024	9.2931
chr3L	14584575	14584782	7.11557
chr3L	14598321	14598919	12.7624
chr3L	15043422	15043727	10.2787
chr3L	19662918	19663127	43.8332
chr3L	19668855	19669074	26.2557
chr3L	19681750	19681983	5.62447
chr3L	20692899	20693283	6.50734
chr3L	20693454	20693710	6.49336
chr3L	20797745	20797995	5.40507
chr3L	21462411	21462789	4.61197
chr3L	21466742	21466942	25.5574
chr3L	21468895	21469290	10.1397
chr3L	21472163	21472471	7.919
chr3L	21472942	21473177	7.12647
chr3L	21474510	21474891	4.00295
chr3L	21475225	21475591	4.62446
chr3L	21480215	21480421	4.98252
chr3L	21583309	21583611	5.21736
chr3L	21594783	21595058	12.3261
chr3L	21602761	21603123	6.29647
chr3L	21803721	21803946	6.64475
chr3L	21811657	21812013	6.47961
chr3L	23113938	23114167	9.48474
chr3L	23115693	23115956	17.2293
chr3L	23116445	23116955	27.3989
chr3L	23117112	23117426	20.7195
chr3L	25131311	25131654	21.6898
chr3L	25132810	25133027	13.4992
chr3L	25133863	25134414	15.8813
chr3R	3169964	3170329	23.0462
chr3R	4345872	4346149	19.902
chr3R	4346272	4346480	10.7994
chr3R	4347005	4347253	6.03277
chr3R	4846187	4846421	14.172
chr3R	4847302	4847524	6.61955
chr3R	4848118	4848388	6.56111
chr3R	4850165	4850579	8.23226
chr3R	4851017	4851384	11.7059
chr3R	4853166	4853474	6.88446
chr3R	4853655	4853855	4.61378
chr3R	6677154	6677497	5.56854
chr3R	6677705	6678355	7.78189
chr3R	6739620	6740019	7.22435
chr3R	6781518	6781889	6.14585
chr3R	6789424	6789714	7.47685
chr3R	6792343	6793007	7.60003
chr3R	6801155	6801435	15.2556
chr3R	6841716	6842086	9.381
chr3R	6849675	6849897	7.97173
chr3R	6873211	6873555	4.52114
chr3R	6874549	6874859	10.673
chr3R	6887658	6887923	5.93601
chr3R	6899704	6899955	5.78166
chr3R	6904133	6904539	7.30126
chr3R	6913668	6913884	5.54931
chr3R	6915959	6916163	5.90709
chr3R	6936533	6936845	5.56638
chr3R	7002766	7003058	11.1742
chr3R	7004832	7005056	17.232
chr3R	7035825	7036251	4.74883
chr3R	7938770	7939192	9.32009
chr3R	7960514	7960785	12.9633
chr3R	8180142	8180342	11.7031
chr3R	8185402	8185753	8.21947
chr3R	8279339	8279745	7.61163
chr3R	8335768	8336007	33.4093
chr3R	10366838	10367228	9.35533
chr3R	11354412	11354708	8.12185
chr3R	12266685	12266885	37.5503
chr3R	12277778	12278045	10.9011
chr3R	13062263	13062463	7.91021
chr3R	13070102	13070602	4.55175
chr3R	13076603	13077129	15.9689
chr3R	13811781	13812135	6.44017
chr3R	13873441	13873994	6.47567
chr3R	13875813	13876046	17.4547
chr3R	13876154	13876507	10.8813
chr3R	13883876	13884076	5.14279
chr3R	13902239	13903261	10.8033
chr3R	16035629	16035856	9.86006
chr3R	16407626	16408074	3.75516
chr3R	16416044	16416485	3.92991
chr3R	16676236	16676444	6.91447
chr3R	16679999	16680259	3.96482
chr3R	16694659	16695003	9.73402
chr3R	16716830	16717035	8.39495
chr3R	16746086	16746368	7.71887
chr3R	16774624	16775007	8.60193
chr3R	16810196	16810521	6.06133
chr3R	16821131	16821353	8.41184
chr3R	16827134	16827893	5.15331
chr3R	16877511	16877723	7.231
chr3R	16879766	16880125	4.65241
chr3R	16884058	16884294	3.71358
chr3R	16884776	16885003	6.42173
chr3R	16900563	16900802	7.75788
chr3R	16901594	16902188	5.45893
chr3R	16902687	16902961	4.36036
chr3R	16903459	16903802	4.47411
chr3R	16905086	16905398	4.19869
chr3R	16906697	16907056	9.3937
chr3R	16907615	16907815	5.64389
chr3R	16909669	16909908	19.2242
chr3R	16913823	16914198	3.97321
chr3R	16916591	16916796	5.29867
chr3R	16917032	16917516	9.90958
chr3R	16920827	16921223	6.65021
chr3R	16929697	16929964	5.59247
chr3R	16931107	16931632	5.69368
chr3R	16935983	16936452	6.5275
chr3R	16940816	16941039	4.17663
chr3R	16942204	16942608	7.15467
chr3R	16946394	16947250	11.8507
chr3R	16947771	16948109	6.12974
chr3R	16949174	16949404	4.56632
chr3R	16950978	16951444	4.80022
chr3R	16951629	16951843	21.2987
chr3R	16952539	16953328	12.6621
chr3R	16954745	16955040	5.0464
chr3R	16958751	16959091	7.89094
chr3R	16959891	16960282	6.61844
chr3R	16961464	16961755	5.7308
chr3R	16964877	16965540	17.565
chr3R	16967410	16968364	10.673
chr3R	16974868	16975449	10.6614
chr3R	17556433	17556681	9.1887
chr3R	17559669	17559899	6.24607
chr3R	18040056	18040277	8.33188
chr3R	18063662	18063966	6.53944
chr3R	18237034	18237436	20.6641
chr3R	21381462	21381694	4.75877
chr3R	21389238	21389547	5.94428
chr3R	21389653	21390272	6.73959
chr3R	21394723	21394980	6.78957
chr3R	21395917	21396120	4.9271
chr3R	21422459	21422777	20.7651
chr3R	21433771	21433972	5.75433
chr3R	21441648	21441906	11.7221
chr3R	21445460	21446071	9.19731
chr3R	21447912	21448356	5.40233
chr3R	21460314	21460972	6.92637
chr3R	21461907	21462282	4.36423
chr3R	21466142	21466434	8.51472
chr3R	21498855	21499152	7.45922
chr3R	21500040	21500443	12.5783
chr3R	21502319	21502783	5.82051
chr3R	21503656	21503950	21.2032
chr3R	21556102	21556968	6.33079
chr3R	21559258	21559462	7.01659
chr3R	21560764	21560973	8.42821
chr3R	23141189	23141463	7.92725
chr3R	23191888	23192351	5.5594
chr3R	23195610	23195942	6.13026
chr3R	23196540	23196744	9.73389
chr3R	23201963	23202168	5.90161
chr3R	25082958	25083300	4.79602
chr3R	25083641	25084063	11.4011
chr3R	25084229	25084455	9.21335
chr3R	25089727	25090079	15.2832
chr3R	28545957	28546453	4.45647
chr3R	28550829	28551131	11.2293
chr3R	28553941	28554205	4.35612
chr3R	28582682	28583172	5.59462
chr3R	28583865	28584213	8.10745
chr3R	29556879	29557711	9.30654
chr3R	29560951	29561151	6.95283
chr3R	29564128	29564366	13.503
chr3R	29693411	29693637	3.98749
chr3R	30270853	30271183	6.4685
chr3R	30274805	30275199	12.0463
chr3R	30279718	30279953	10.2546
chr3R	30768805	30769069	5.7715
chr3R	30774059	30774447	5.94698
chr3R	30784193	30784522	4.82192
chr3R	30785343	30785911	7.84323
chr3R	30852847	30853420	9.70999
chr3R	30904251	30904471	8.71244
chr3R	30905611	30905868	10.3515
chr3R	30912100	30912345	8.85852
chr3R	30915398	30915663	6.30614
chr3R	30916220	30916548	4.18196
chr3R	31062817	31063106	4.37344
chr3R	31066416	31066616	13.6539
chr3R	32071645	32071994	8.57205
chr4	390978	391362	15.1847
chr4	1286200	1286438	4.81013
chrUn_CP007081v1	87890	88702	34.3806
chrUn_CP007088v1	22	285	25.8079
chrUn_CP007100v1	5808	6419	18.732
chrUn_CP007120v1	18220	18441	14.4139
chrUn_CP007120v1	37353	39395	21.7305
chrUn_CP007120v1	40829	42395	19.3436
chrUn_CP007120v1	43490	44081	25.3833
chrUn_CP007120v1	44343	45725	23.9631
chrUn_CP007120v1	46734	47223	34.899
chrUn_CP007120v1	47760	49053	34.2553
chrUn_CP007120v1	50327	50667	32.8711
chrUn_CP007120v1	53101	53386	23.8894
chrUn_CP007120v1	54063	54355	14.4315
chrUn_CP007120v1	56021	56571	25.73
chrUn_CP007120v1	56761	57897	27.2561
chrUn_CP007120v1	62911	63785	18.263
chrUn_CP007120v1	65227	66971	19.2635
chrUn_CP007120v1	67701	67998	20.8271
chrUn_CP007120v1	68448	69588	23.9465
chrUn_CP007120v1	70932	71402	26.8047
chrUn_CP007120v1	71659	73176	30.0417
chrUn_CP007120v1	73470	75171	23.5907
chrUn_CP007120v1	75310	75540	13.8753
chrUn_CP007120v1	75701	75908	21.7157
chrUn_CP007120v1	76070	76356	26.3861
chrUn_CP007120v1	76478	76761	10.0282
chrUn_DS483755v1	77	472	23.9355
chrUn_DS483762v1	6376	6681	20.5499
chrUn_DS483773v1	932	1363	9.63379
chrUn_DS483817v1	3485	3801	13.5872
chrUn_DS484007v1	150	579	18.771
chrUn_DS484202v1	1187	1387	13.2778
chrUn_DS484234v1	2297	2521	19.9273
chrUn_DS484383v1	1835	2117	11.7077
chrUn_DS484484v1	1440	2007	27.2202
chrUn_DS484861v1	18	254	12.4441
chrUn_DS485031v1	989	1189	15.1418
chrUn_DS485249v1	152	370	21.2312
chrUn_DS485255v1	539	840	22.3331
chrUn_DS485270v1	4	250	12.3119
chrUn_DS485386v1	850	1094	17.0904
chrUn_DS485453v1	70	393	13.1271
chrUn_DS485462v1	563	1093	16.4464
chrUn_DS485558v1	101	425	16.4298
chrUn_DS485808v1	152	469	12.8252
chrUn_DS485808v1	684	1026	16.8872
chrUn_DS485820v1	55	267	19.2008
chrUn_DS485906v1	0	408	22.0026
chrUn_DS485991v1	555	913	17.7123
chrUn_DS485995v1	0	387	12.7481
chrX	60467	60722	7.3498
chrX	91906	92122	17.2445
chrX	591376	592019	6.68449
chrX	601436	601636	23.4977
chrX	2143611	2143820	8.41457
chrX	2427568	2428069	10.3365
chrX	4425611	4425977	5.58954
chrX	5594812	5595022	4.52068
chrX	9694938	9695412	9.02268
chrX	9753136	9753338	26.3467
chrX	17315318	17315554	7.18229
chrX	17769201	17769519	7.96305
chrX	17784793	17785044	12.7674
chrX	19544388	19544804	9.05809
chrX	19545196	19545512	11.8109
chrX	20688075	20688334	28.2652
chrX	22280149	22280427	23.9143
chrX	22282303	22282507	16.1491
chrX	22356419	22356630	19.624
chrX	22398246	22398488	10.5933
chrX	23216979	23218095	16.535
chrX	23221535	23221782	16.9807
chrX	23222157	23222650	21.0104
chrX	23226063	23226741	24.5309
chrX	23227854	23228653	24.677
chrX	23232064	23232311	18.7677
chrX	23409303	23409649	11.682
chrX	23527027	23527237	13.5158
chrX_CP007104v1_random	2560	2826	25.3239
chrX_CP007104v1_random	4708	4992	17.0908
chrX_DS483655v1_random	12043	12243	8.04573
chrX_DS483851v1_random	776	990	16.4561
chrX_DS483885v1_random	1022	1369	6.6994
chrX_DS483892v1_random	2829	3065	12.9804
chrX_DS483897v1_random	640	1069	12.0865
chrX_DS483926v1_random	2818	3191	18.8701
chrX_DS484057v1_random	542	772	7.72836
chrX_DS484101v1_random	2356	2586	16.081
chrX_DS484131v1_random	1937	2157	18.1008
chrX_DS484187v1_random	659	866	11.1275
chrX_DS484219v1_random	2033	2402	14.5402
chrX_DS484519v1_random	1283	1891	32.4262
chrX_DS484529v1_random	954	1154	15.1344
chrX_DS484610v1_random	614	828	18.4993
chrX_DS484995v1_random	1038	1248	19.3855
chrX_DS485111v1_random	140	505	15.9408
chrX_DS485111v1_random	828	1099	14.6733
chrX_DS485225v1_random	77	441	16.4395
chrX_DS485599v1_random	629	983	17.2142
chrX_DS485647v1_random	189	458	21.0992
chrX_DS485647v1_random	766	996	19.2438
chrX_DS485672v1_random	549	955	20.7919
chrY	124309	124737	20.6927
chrY	200695	200901	7.5558
chrY	203432	203756	15.9551
chrY	550919	551125	14.1607
chrY	652889	653261	13.0564
chrY	912962	913310	22.1669
chrY	1642151	1642576	25.3816
chrY	3560285	3560561	10.7201
chrY	3562360	3562644	16.4431
chrY_CP007112v1_random	27	298	16.3869

## Sheet: downregulated regions-re1
downregulated regions-re1
chromosome	start	end	log10 likelihood ratio
chrM	39	355	6.95259
chrM	2036	2350	5.11298
chrM	2577	3398	4.74981
chrM	4074	4783	5.24584
chrM	4902	6005	5.67625
chrM	6787	7397	4.81643
chrM	7596	7862	5.75004
chrM	8500	9097	4.7758
chrM	10485	13309	6.21344
chrM	13420	13638	5.44312
chrM	13906	14554	5.24356

## Sheet: downregulated regions-re2
downregulated regions-re2
chromosome	start	end	log10 likelihood ratio
chrM	32	499	22.5095
chrM	1185	6370	15.152
chrM	6692	7963	17.9575
chrM	8250	9159	22.2189
chrM	10296	13630	19.3227
chrM	13908	14716	17.4439
