# Supplementary material for: Exposure to high-sugar diet induces transgenerational changes in sweet sensitivity and feeding behavior via H3K27me3 reprogramming
Source: eLife. 2023 Sep 12;12:e85365. doi: 10.7554/eLife.85365 (PMC10558205; doi:10.7554/eLife.85365)
Supplement: Supplementary file 2. — The original data of this experiment were from the same batch as Supplementary file 1, but the differential peaks were reanalyzed. The cutoff is log10 likelihood ratio >1 (n=2 biological replicates, each containing 1000 embryos). [file elife-85365-supp2.xlsx]

## Sheet: upregulated regions-re1
upregulated regions-re1
chromosome	start	end	log10 likelihood ratio
chr2L	244	698	16.2959
chr2L	1036	1996	4.50464
chr2L	2159	2370	8.54838
chr2L	2818	3372	18.9122
chr2L	3829	4347	8.14889
chr2L	5150	5397	21.5636
chr2L	369546	369776	2.60594
chr2L	375031	375304	4.96751
chr2L	376012	376277	6.74618
chr2L	381072	381315	25.6252
chr2L	386732	386946	10.1446
chr2L	387856	388075	7.09436
chr2L	512648	512899	3.44279
chr2L	514277	514604	8.05542
chr2L	550098	550298	9.99406
chr2L	580447	580726	3.78129
chr2L	583059	583703	6.3359
chr2L	584141	584501	5.28347
chr2L	585245	585552	6.69098
chr2L	586572	587126	3.07515
chr2L	588968	589670	15.9782
chr2L	590500	591046	14.4589
chr2L	592134	592855	2.61895
chr2L	592977	594390	6.41557
chr2L	595021	595520	4.80188
chr2L	595752	596944	3.17608
chr2L	597082	598202	5.69432
chr2L	598478	599197	5.83143
chr2L	600109	600454	2.66178
chr2L	600700	600976	6.67476
chr2L	887886	888107	23.4393
chr2L	993810	994227	7.83939
chr2L	1234315	1234521	6.29642
chr2L	1453054	1453378	7.9677
chr2L	1617726	1618012	14.4148
chr2L	1657916	1658137	6.79991
chr2L	1835811	1836018	5.01463
chr2L	1945142	1945415	2.30869
chr2L	1948076	1948550	9.62409
chr2L	1950492	1951250	3.69755
chr2L	1951384	1951590	2.24384
chr2L	1952143	1952906	3.03019
chr2L	1953024	1953325	2.5532
chr2L	1953507	1953824	2.31592
chr2L	1954203	1954468	2.81789
chr2L	1954980	1955433	15.3921
chr2L	1955647	1956021	4.19976
chr2L	1956248	1956479	11.8424
chr2L	1956605	1956917	4.94905
chr2L	1957203	1957736	2.29394
chr2L	1958276	1958820	3.4339
chr2L	1959122	1959405	1.76519
chr2L	1959590	1959793	22.1653
chr2L	1960011	1960514	3.12482
chr2L	1960763	1961120	7.95944
chr2L	1961877	1962361	6.89193
chr2L	1962838	1963263	8.61359
chr2L	1963623	1964034	7.73898
chr2L	1964276	1964891	5.92493
chr2L	1965339	1965542	5.47069
chr2L	1965700	1968877	6.17038
chr2L	1969003	1969534	4.24912
chr2L	1969750	1970172	3.1949
chr2L	1971331	1971898	2.84066
chr2L	1972151	1972455	3.63378
chr2L	1973162	1973409	7.88323
chr2L	2024860	2025073	6.32689
chr2L	2089562	2089762	7.40583
chr2L	2151038	2151351	8.23785
chr2L	2238924	2239143	6.52588
chr2L	2446069	2446618	7.40155
chr2L	2446875	2447082	4.41941
chr2L	2447972	2448245	11.3094
chr2L	2449057	2449464	3.01199
chr2L	2450000	2450219	6.52489
chr2L	2457729	2458432	3.52111
chr2L	2464500	2464700	2.58477
chr2L	2466907	2467133	3.19681
chr2L	2486515	2486715	7.80069
chr2L	2717404	2717630	10.6055
chr2L	2799706	2799926	23.6787
chr2L	3081826	3082083	4.14676
chr2L	3504986	3505254	5.71003
chr2L	3533327	3533885	7.63896
chr2L	3534110	3534552	8.18864
chr2L	3534765	3535171	2.50389
chr2L	3535670	3536067	1.80257
chr2L	3537220	3537451	5.14724
chr2L	3541184	3541542	10.7159
chr2L	3541871	3542374	7.49635
chr2L	3542917	3543214	7.96625
chr2L	3543546	3544417	3.58974
chr2L	3545216	3545602	7.78242
chr2L	3547510	3547710	2.91923
chr2L	3552322	3552522	3.85204
chr2L	3559162	3559435	6.03808
chr2L	3562175	3562409	13.7729
chr2L	3562633	3562848	4.06873
chr2L	3570390	3570625	4.74039
chr2L	3571651	3571851	1.76261
chr2L	3574106	3574328	5.45922
chr2L	3575350	3575687	17.9835
chr2L	3578177	3578573	12.3582
chr2L	3579026	3579923	5.10224
chr2L	3581744	3582025	5.27862
chr2L	3582703	3583398	6.86608
chr2L	3585144	3585466	3.83768
chr2L	3586306	3586512	8.46826
chr2L	3591452	3591755	2.88607
chr2L	3592275	3592913	4.63114
chr2L	3595056	3595582	11.4483
chr2L	3596098	3596340	9.26362
chr2L	3596788	3597545	3.17965
chr2L	3598152	3598574	13.4856
chr2L	3599159	3599559	4.37514
chr2L	3601134	3601451	8.27095
chr2L	3601563	3601765	3.52309
chr2L	3602593	3603158	12.4536
chr2L	3604725	3605544	6.83284
chr2L	3605725	3605936	3.32655
chr2L	3607165	3607425	3.65958
chr2L	3608486	3608711	3.59893
chr2L	3608931	3609808	4.76187
chr2L	3610348	3611193	3.43288
chr2L	3611706	3612319	5.36244
chr2L	3612492	3613494	5.61971
chr2L	3614293	3614955	9.34264
chr2L	3616122	3616464	13.1476
chr2L	3616713	3617128	5.0577
chr2L	3658792	3659069	11.567
chr2L	3659756	3660287	5.34563
chr2L	3660814	3661366	3.37581
chr2L	3662088	3662289	4.65004
chr2L	3662597	3662971	9.1746
chr2L	3664051	3664357	2.59397
chr2L	3664913	3665260	13.0029
chr2L	3665666	3666048	7.32578
chr2L	3666299	3666502	28.2494
chr2L	3815412	3815820	5.0058
chr2L	3817883	3818243	11.3341
chr2L	3820163	3820363	7.67233
chr2L	3821316	3821537	13.4683
chr2L	3821640	3821840	25.3171
chr2L	3822324	3823125	4.38527
chr2L	3824155	3824466	4.79525
chr2L	3824583	3824977	3.12858
chr2L	3825972	3826909	4.34961
chr2L	3829208	3829528	5.23273
chr2L	3830190	3830550	5.24047
chr2L	3830870	3831150	18.3182
chr2L	3833841	3834444	8.14147
chr2L	3837291	3838682	5.42417
chr2L	3839759	3840035	6.30946
chr2L	3841283	3841540	6.12974
chr2L	3842664	3843108	4.05686
chr2L	3847001	3847465	5.88249
chr2L	3850060	3850286	3.18753
chr2L	3853251	3853534	6.71175
chr2L	3855254	3855532	13.776
chr2L	3857932	3858272	10.4622
chr2L	4372259	4372486	8.52856
chr2L	4663982	4664250	11.0849
chr2L	5298220	5298429	2.89605
chr2L	5358724	5358961	3.90446
chr2L	5384599	5385090	9.19557
chr2L	5392957	5393229	3.50479
chr2L	5395928	5396147	5.57859
chr2L	5396618	5397062	5.3754
chr2L	5397750	5398425	4.09279
chr2L	5398567	5398862	6.80583
chr2L	5400547	5400938	3.92872
chr2L	5401048	5401488	5.15716
chr2L	5401890	5402202	4.88636
chr2L	5402738	5402941	4.16417
chr2L	5404775	5405448	13.8444
chr2L	5406895	5407326	3.91163
chr2L	5407584	5407844	4.92593
chr2L	5412840	5413103	2.67373
chr2L	5413771	5414178	3.69047
chr2L	5415462	5416004	14.0229
chr2L	5417579	5417839	23.914
chr2L	5419548	5420775	13.3265
chr2L	5421550	5421834	2.74224
chr2L	5451760	5452191	5.77323
chr2L	5456958	5457185	7.59647
chr2L	5457615	5458325	3.84003
chr2L	5460236	5460440	3.83318
chr2L	5462727	5462931	4.65807
chr2L	5463249	5463653	7.1
chr2L	5464051	5464266	12.5067
chr2L	5464549	5464749	3.13817
chr2L	5465373	5465589	3.25675
chr2L	5466384	5466624	3.39241
chr2L	5476674	5477138	9.06834
chr2L	5478992	5479213	12.0954
chr2L	5480773	5481031	4.81707
chr2L	5499734	5500007	5.51016
chr2L	5936458	5936684	11.8303
chr2L	6018593	6018902	9.1381
chr2L	6020945	6021157	6.5441
chr2L	6171086	6171485	13.7975
chr2L	6174493	6174700	4.9155
chr2L	6175931	6176298	5.32087
chr2L	6176523	6176918	4.65297
chr2L	6177462	6177757	3.30983
chr2L	6217511	6217759	10.9642
chr2L	6318592	6318809	26.5036
chr2L	6529831	6530210	15.429
chr2L	6536624	6537117	2.35187
chr2L	6537332	6537565	3.56868
chr2L	6537682	6537901	2.44537
chr2L	6538267	6538829	3.75752
chr2L	6540482	6540912	4.52077
chr2L	6542193	6543322	8.32409
chr2L	6543923	6544266	16.9429
chr2L	6545255	6545826	3.85062
chr2L	6546364	6546652	11.1158
chr2L	6548109	6548441	4.18462
chr2L	6548550	6549393	5.22924
chr2L	6693695	6693895	5.39388
chr2L	6715694	6716026	9.17238
chr2L	6809494	6809726	10.0603
chr2L	6816234	6816434	10.0292
chr2L	6817519	6817797	13.7107
chr2L	6818946	6819340	13.4274
chr2L	6821195	6821424	4.56764
chr2L	6822081	6823112	4.44832
chr2L	6823833	6824209	4.22569
chr2L	6831251	6831872	4.14536
chr2L	6832159	6832561	3.54481
chr2L	6834370	6835013	8.56457
chr2L	6835455	6835676	4.76448
chr2L	6835883	6836195	7.48682
chr2L	6837136	6837402	11.0585
chr2L	6837748	6838078	7.9287
chr2L	6845490	6845833	7.1933
chr2L	7246030	7246239	10.201
chr2L	7293790	7294159	4.97402
chr2L	7297797	7298067	1.93012
chr2L	7300263	7300689	7.1974
chr2L	7301427	7301848	3.2461
chr2L	7302443	7302649	5.58372
chr2L	7303272	7303512	3.89393
chr2L	7303909	7304178	7.40389
chr2L	7304287	7305126	4.99185
chr2L	7307533	7308140	9.41965
chr2L	7308476	7308834	2.65671
chr2L	7308974	7309338	2.51166
chr2L	7309664	7310127	12.7765
chr2L	7310613	7310889	2.4346
chr2L	7312762	7312986	18.4164
chr2L	7319731	7319931	5.2508
chr2L	7589506	7589716	30.1897
chr2L	7607046	7607269	8.93623
chr2L	7838822	7839033	6.9116
chr2L	8064585	8064942	4.61748
chr2L	8120919	8121119	9.56644
chr2L	8794190	8794402	3.14594
chr2L	8819538	8819907	2.42218
chr2L	8824379	8824828	14.5974
chr2L	8826714	8827212	2.52624
chr2L	8827679	8828822	4.56258
chr2L	8829987	8830309	3.99753
chr2L	8836781	8837005	2.70969
chr2L	8838883	8839270	6.43236
chr2L	8839525	8839725	15.1781
chr2L	8845524	8845774	9.93281
chr2L	8861368	8861688	2.27499
chr2L	8863061	8863341	4.98899
chr2L	8870939	8871140	11.737
chr2L	8875066	8875305	14.7
chr2L	8883555	8883827	7.13697
chr2L	9306152	9306423	11.601
chr2L	9577798	9578448	4.34409
chr2L	9578967	9579171	14.1894
chr2L	9579418	9579761	12.0641
chr2L	9580261	9580640	7.99448
chr2L	9580775	9581518	2.89938
chr2L	9582046	9582363	2.28044
chr2L	9583724	9584052	8.00016
chr2L	9587436	9587704	6.82572
chr2L	9590012	9590385	3.09368
chr2L	9590501	9590711	4.02032
chr2L	9591343	9591803	6.61778
chr2L	9597359	9597616	3.55114
chr2L	9599269	9599615	10.1861
chr2L	9599865	9600499	10.0206
chr2L	9600997	9601322	2.52671
chr2L	9602062	9602266	5.12897
chr2L	9603796	9604002	1.75009
chr2L	9604682	9605146	11.3568
chr2L	9605263	9605773	7.27749
chr2L	9607022	9607594	6.45408
chr2L	9609174	9609585	6.61312
chr2L	9609761	9610265	8.31847
chr2L	9610670	9610959	4.92538
chr2L	9611066	9611414	5.64991
chr2L	9928009	9928210	19.4963
chr2L	10162773	10162973	4.15287
chr2L	10351661	10352052	5.10895
chr2L	10354371	10354768	10.8475
chr2L	10545342	10545551	21.8123
chr2L	11244809	11245117	11.4716
chr2L	11308194	11308415	4.82769
chr2L	11324035	11324271	3.26529
chr2L	11337084	11337525	9.7932
chr2L	11339776	11340125	6.7069
chr2L	11342019	11342221	2.43354
chr2L	11344024	11344304	7.74891
chr2L	11354069	11354281	10.3793
chr2L	11355141	11355341	3.89721
chr2L	11364440	11364933	10.7019
chr2L	11371819	11372154	5.11835
chr2L	11376998	11377356	6.67878
chr2L	11439624	11439891	14.6426
chr2L	11441105	11441382	2.91806
chr2L	11447183	11447437	2.03431
chr2L	11449186	11449386	5.21634
chr2L	11467161	11467371	21.5261
chr2L	11468791	11468991	10.3421
chr2L	11519455	11519687	13.5606
chr2L	11855501	11855712	15.0859
chr2L	11966583	11966848	22.0024
chr2L	12004465	12006102	3.5347
chr2L	12008165	12008697	3.95848
chr2L	12008971	12009771	4.84582
chr2L	12082747	12083405	8.88457
chr2L	12083647	12083935	4.47032
chr2L	12084099	12085221	8.17498
chr2L	12087270	12087704	4.60337
chr2L	12089111	12089671	3.38527
chr2L	12089789	12090170	4.09593
chr2L	12091029	12091341	2.2313
chr2L	12130705	12130925	4.59846
chr2L	12446804	12447006	14.9656
chr2L	12611875	12612141	7.12249
chr2L	12946156	12946356	20.2701
chr2L	13271853	13272069	4.76371
chr2L	13875438	13875683	9.01467
chr2L	13890298	13890747	6.1248
chr2L	13915370	13915598	7.09978
chr2L	14535947	14536236	6.46449
chr2L	15109596	15110375	3.94226
chr2L	15112369	15112637	2.02411
chr2L	15250794	15251096	10.0849
chr2L	15334143	15334708	3.36702
chr2L	15430782	15431013	21.0852
chr2L	15441856	15442124	3.30441
chr2L	15461851	15462056	8.68077
chr2L	15473021	15473358	5.47641
chr2L	15488706	15488910	14.6101
chr2L	15718926	15719280	8.25146
chr2L	15757107	15757363	14.4077
chr2L	16232080	16232339	9.79674
chr2L	16238293	16238549	4.63146
chr2L	16419242	16419566	6.20232
chr2L	16419999	16420281	4.48558
chr2L	16420841	16421175	4.43766
chr2L	16424178	16424566	5.35851
chr2L	16440418	16440699	9.11189
chr2L	16441550	16441795	9.58916
chr2L	16478090	16478417	18.2417
chr2L	16480320	16480689	12.9767
chr2L	16483046	16483377	8.86761
chr2L	16483506	16483706	16.77
chr2L	16484027	16484663	5.24366
chr2L	17149639	17149887	24.0023
chr2L	17511213	17511413	10.6666
chr2L	17744741	17745144	5.18914
chr2L	18378025	18378268	3.6335
chr2L	18413994	18414194	2.50187
chr2L	18596304	18596826	2.91544
chr2L	18602444	18602755	14.9731
chr2L	18727166	18727429	2.98646
chr2L	18728630	18729175	14.4693
chr2L	18733811	18734297	14.9481
chr2L	18736570	18736937	6.20387
chr2L	18737728	18737937	6.29512
chr2L	18738594	18739045	14.442
chr2L	18739260	18739686	3.70755
chr2L	18740482	18740750	30.3109
chr2L	18741406	18741780	2.25924
chr2L	18769208	18769449	7.53344
chr2L	18773422	18773669	3.09756
chr2L	18777755	18777962	12.8494
chr2L	18779795	18780574	5.8398
chr2L	18783666	18783895	11.6418
chr2L	18785280	18785569	3.68202
chr2L	18785847	18786109	2.2155
chr2L	18786632	18786855	9.86738
chr2L	18792943	18793256	4.60121
chr2L	18793956	18794608	7.80504
chr2L	18797903	18798235	4.49984
chr2L	18798735	18799037	2.87159
chr2L	18800083	18800681	10.1357
chr2L	18804514	18805041	3.53979
chr2L	18805518	18805849	13.1017
chr2L	18867836	18868039	7.88209
chr2L	18868262	18868651	21.4823
chr2L	18869307	18869507	8.80452
chr2L	18873035	18873858	21.0176
chr2L	18879255	18879552	5.88425
chr2L	18880435	18881011	5.61865
chr2L	18881617	18882336	15.4098
chr2L	18882752	18882979	3.38545
chr2L	18883103	18883432	5.62078
chr2L	18883858	18884458	16.5102
chr2L	18884737	18885431	4.21337
chr2L	18885972	18886532	4.4513
chr2L	18886917	18887219	1.99159
chr2L	18887824	18888084	17.7096
chr2L	18888548	18888791	6.20371
chr2L	18889641	18889917	5.60362
chr2L	18894236	18894917	3.32871
chr2L	18904830	18905030	3.2293
chr2L	18918995	18919482	5.65219
chr2L	18921517	18921779	8.85077
chr2L	18927277	18927591	22.0655
chr2L	18929508	18929744	24.9565
chr2L	18931452	18931672	5.90623
chr2L	19087325	19087582	19.3769
chr2L	19125640	19125935	17.5333
chr2L	19185087	19185293	23.8509
chr2L	19188330	19188530	6.89941
chr2L	19224908	19225277	16.1349
chr2L	19253078	19253357	5.07777
chr2L	19317108	19317340	2.50328
chr2L	19431646	19431949	3.33768
chr2L	19465971	19466341	4.06872
chr2L	19669776	19669977	8.28756
chr2L	19864096	19864420	9.9147
chr2L	19867895	19868126	13.5703
chr2L	19872288	19872518	3.65191
chr2L	19877090	19877290	21.9093
chr2L	20217253	20217615	8.38851
chr2L	20768718	20769268	6.84242
chr2L	20770953	20771674	6.30435
chr2L	20771953	20772706	4.98112
chr2L	20772832	20773205	3.68337
chr2L	20773574	20774010	2.81293
chr2L	20774407	20775135	4.51594
chr2L	20775339	20776818	3.32683
chr2L	20777309	20777650	8.85116
chr2L	20777894	20778346	5.89482
chr2L	20778665	20779166	5.38417
chr2L	20779380	20779871	2.91071
chr2L	20780304	20782900	4.64322
chr2L	20783950	20784444	2.60701
chr2L	20784723	20784947	2.40646
chr2L	20785271	20785653	1.84922
chr2L	21084897	21085129	17.5468
chr2L	21245702	21245916	3.123
chr2L	21422286	21422605	15.9104
chr2L	21466495	21466886	14.6765
chr2L	21481659	21482199	9.78949
chr2L	21493494	21493809	8.56204
chr2L	21801440	21801755	5.41513
chr2L	21803091	21803310	6.05465
chr2L	21804175	21804375	6.9418
chr2L	21807228	21807597	4.55565
chr2L	21844641	21845075	6.47304
chr2L	21845205	21845516	3.78761
chr2L	21847573	21847888	13.9765
chr2L	21859386	21859717	4.84664
chr2L	21861645	21861875	4.30793
chr2L	21864612	21864870	6.45097
chr2L	21871445	21871726	5.81179
chr2L	21872399	21872642	3.95034
chr2L	21882171	21882400	7.87242
chr2L	22028861	22029061	2.93386
chr2L	22959620	22959820	3.79988
chr2L	23442344	23442636	5.10833
chr2L	23512810	23513599	26.7709
chr2R	50442	50676	4.70095
chr2R	243677	244019	8.60482
chr2R	245327	245565	7.4675
chr2R	532601	532806	8.89092
chr2R	697956	698160	16.2358
chr2R	748730	748958	5.86439
chr2R	870138	870559	16.4647
chr2R	912161	912391	19.5811
chr2R	1032302	1032590	5.30994
chr2R	1097820	1098046	9.47776
chr2R	1154765	1154991	6.76446
chr2R	1158830	1159064	6.5531
chr2R	1180185	1180540	22.9736
chr2R	1244580	1244829	7.60434
chr2R	1416035	1416274	4.75167
chr2R	1565940	1566151	6.06773
chr2R	1825716	1826668	20.9313
chr2R	1942729	1942930	21.1025
chr2R	2197535	2197828	4.45463
chr2R	2475128	2475387	10.7384
chr2R	2578161	2578389	6.08248
chr2R	2859039	2859266	7.57237
chr2R	2906589	2906789	3.58375
chr2R	3356836	3357178	9.87412
chr2R	3790105	3790358	8.08412
chr2R	3971423	3971629	7.06152
chr2R	4262363	4262573	4.39436
chr2R	4808713	4808953	24.7068
chr2R	4863891	4864424	30.1988
chr2R	4864719	4865076	12.0526
chr2R	4865933	4866582	12.2209
chr2R	4867460	4868067	8.28981
chr2R	4868321	4868750	20.5992
chr2R	4870847	4871099	14.4771
chr2R	4922963	4923170	5.87639
chr2R	4961924	4962136	6.55037
chr2R	4991749	4991996	9.89274
chr2R	5105865	5106105	3.69616
chr2R	5543643	5543844	4.0107
chr2R	5725719	5725938	3.02067
chr2R	5727818	5728046	5.0556
chr2R	5734871	5735198	3.50448
chr2R	5747784	5747984	4.33107
chr2R	5892167	5892375	11.204
chr2R	5916310	5916547	5.85582
chr2R	6277428	6277667	9.70137
chr2R	6293652	6294001	6.42287
chr2R	6308423	6308623	9.09624
chr2R	6371602	6371804	2.35102
chr2R	6379313	6379570	3.6911
chr2R	6384840	6385042	5.51581
chr2R	6430176	6430437	2.60217
chr2R	6503287	6503518	14.6532
chr2R	6509495	6509914	12.0477
chr2R	6952514	6952745	5.75636
chr2R	7147851	7148065	21.5483
chr2R	7200495	7200898	4.73967
chr2R	7242374	7242624	7.12965
chr2R	7340323	7340771	8.46586
chr2R	7411400	7411724	6.58385
chr2R	7413673	7414237	3.63509
chr2R	7415183	7415532	12.0574
chr2R	7415644	7416050	3.29945
chr2R	7419394	7419740	3.09154
chr2R	7421155	7421828	6.61033
chr2R	7421931	7422245	2.73457
chr2R	7424257	7424705	4.12142
chr2R	7424814	7425023	19.6301
chr2R	7425856	7426226	6.84906
chr2R	7427457	7427842	8.21649
chr2R	7428092	7428601	6.75826
chr2R	7429455	7429704	15.6949
chr2R	7430407	7430623	21.5459
chr2R	7433708	7434248	8.22605
chr2R	7450671	7450981	3.65567
chr2R	7632877	7633233	10.0005
chr2R	8018507	8018933	4.29378
chr2R	8019188	8019673	3.34902
chr2R	8020347	8021206	3.5875
chr2R	8021925	8022304	2.59516
chr2R	8022809	8023121	2.53134
chr2R	8024013	8024567	2.17438
chr2R	8025058	8025501	11.6469
chr2R	8026184	8026741	4.26422
chr2R	8027315	8027661	3.04669
chr2R	8027844	8028547	4.25022
chr2R	8028651	8029427	6.91722
chr2R	8029751	8030004	3.58925
chr2R	8031394	8032309	4.44624
chr2R	8032527	8032829	1.57858
chr2R	8034337	8034727	2.08649
chr2R	8035234	8035585	7.3523
chr2R	8035703	8036160	12.6424
chr2R	8040366	8040790	4.65187
chr2R	8043832	8044408	23.5121
chr2R	8044673	8044889	2.83022
chr2R	8046634	8046999	4.99207
chr2R	8047522	8048448	13.036
chr2R	8049923	8050550	3.98855
chr2R	8092960	8093279	12.6669
chr2R	8215757	8216004	8.28943
chr2R	8234068	8234392	12.7142
chr2R	8449858	8450213	6.90848
chr2R	8491829	8492185	6.45885
chr2R	8531416	8531636	12.3381
chr2R	8693143	8693343	12.804
chr2R	9127442	9127644	7.85933
chr2R	9193935	9194172	4.59405
chr2R	9195275	9196216	5.4731
chr2R	9196890	9197715	9.27321
chr2R	9200244	9200572	3.21232
chr2R	9201513	9201842	6.88692
chr2R	9219937	9220137	18.1905
chr2R	9420264	9420469	30.2465
chr2R	9698552	9698835	6.68631
chr2R	9719482	9719711	24.6417
chr2R	9806268	9806559	5.10497
chr2R	9973283	9976130	5.84636
chr2R	9976260	9976927	14.0439
chr2R	9977224	9979076	4.71768
chr2R	9979510	9980492	4.175
chr2R	9980955	9982139	6.64849
chr2R	9982260	9984094	5.30118
chr2R	9984339	9985946	7.86564
chr2R	9986145	9987937	3.66387
chr2R	10232429	10232655	12.6669
chr2R	10233939	10234151	10.87
chr2R	10238068	10238388	5.11728
chr2R	10240413	10240789	6.02222
chr2R	10241105	10241305	4.84845
chr2R	10241859	10242487	10.8068
chr2R	10256467	10256691	5.37488
chr2R	11002382	11002582	6.49206
chr2R	11470891	11471462	4.95567
chr2R	11471968	11472519	7.6981
chr2R	11474286	11475305	9.0193
chr2R	11475927	11477250	3.01636
chr2R	11477736	11478144	4.63973
chr2R	11479490	11479780	8.13691
chr2R	11481063	11481308	15.4529
chr2R	11482928	11483284	6.26199
chr2R	11491839	11492048	13.0727
chr2R	11503018	11503258	4.27112
chr2R	11523555	11524007	4.11727
chr2R	11524441	11526064	6.04519
chr2R	11526540	11527805	4.38442
chr2R	11530541	11530933	2.19308
chr2R	11531818	11532458	6.2438
chr2R	11532573	11532931	12.7295
chr2R	11533394	11533649	4.03135
chr2R	11534027	11534612	6.28287
chr2R	11535300	11535695	6.62796
chr2R	11536056	11536502	4.47513
chr2R	11537721	11538186	5.85898
chr2R	11538510	11539257	10.3063
chr2R	11539441	11540152	4.13576
chr2R	11541323	11542230	12.9243
chr2R	11543036	11544173	4.83541
chr2R	11544390	11544590	5.95281
chr2R	11544707	11545005	10.7071
chr2R	11546415	11546625	2.79841
chr2R	11549114	11549345	5.71675
chr2R	11550266	11550523	2.56186
chr2R	11550636	11551259	4.40071
chr2R	11551530	11552028	18.4538
chr2R	11552647	11553080	5.59402
chr2R	11554125	11554397	5.61214
chr2R	11554933	11555138	4.38073
chr2R	11556038	11556506	13.482
chr2R	11558148	11558360	3.80992
chr2R	11558753	11559028	2.95055
chr2R	11559790	11560377	4.10109
chr2R	11561215	11562662	5.57715
chr2R	11564455	11564853	11.1816
chr2R	11566272	11566901	4.77716
chr2R	11567477	11567696	3.09212
chr2R	11569376	11569622	5.53047
chr2R	11570152	11570395	3.4674
chr2R	11571768	11571968	6.45732
chr2R	11573826	11574026	25.6247
chr2R	11655563	11655800	5.86183
chr2R	11706124	11706351	13.2797
chr2R	11718755	11719003	7.81045
chr2R	11736885	11737097	12.2678
chr2R	11803633	11803842	12.6668
chr2R	12385603	12385858	29.0738
chr2R	12502966	12503174	11.9708
chr2R	12519470	12519670	4.26626
chr2R	12640613	12640826	13.8836
chr2R	12820465	12820680	5.59904
chr2R	12884445	12885345	13.9421
chr2R	12886276	12886578	3.6688
chr2R	12889047	12889768	4.37185
chr2R	12890193	12891105	10.405
chr2R	12891391	12892133	24.3258
chr2R	12892649	12892945	5.25128
chr2R	12893158	12893408	9.9772
chr2R	12894276	12894872	3.22417
chr2R	12894978	12895242	9.18367
chr2R	12896813	12897175	3.7409
chr2R	12897963	12898359	2.85904
chr2R	12899712	12900665	9.42657
chr2R	12901814	12902244	3.75074
chr2R	12902433	12903332	8.4035
chr2R	12905095	12905447	4.45394
chr2R	12905574	12906049	3.82943
chr2R	12906648	12906948	3.42061
chr2R	12907778	12908327	8.91105
chr2R	12908666	12909173	7.04524
chr2R	12909328	12909843	2.21878
chr2R	12910940	12911336	3.52141
chr2R	12914287	12914561	10.1675
chr2R	12949112	12949545	3.23171
chr2R	12949777	12949987	1.70998
chr2R	12950607	12951308	12.3331
chr2R	12951692	12952110	7.39717
chr2R	12953304	12954327	5.16786
chr2R	12954493	12955670	4.23499
chr2R	12957021	12957287	4.88005
chr2R	12961295	12961497	14.8078
chr2R	12961603	12961817	15.6196
chr2R	12962206	12963111	11.602
chr2R	12966561	12966901	15.554
chr2R	12983385	12983695	10.2153
chr2R	12986909	12987680	5.25041
chr2R	12988099	12988333	10.1714
chr2R	12989235	12989598	2.26905
chr2R	12991028	12991228	3.42146
chr2R	12992953	12993162	5.64405
chr2R	12994353	12994706	8.42073
chr2R	12995160	12995893	5.92559
chr2R	12997291	12997861	7.00943
chr2R	13001168	13001799	12.1009
chr2R	13002417	13003342	17.4484
chr2R	13003642	13004188	4.92354
chr2R	13007865	13008270	19.5302
chr2R	13008406	13009085	5.36287
chr2R	13009273	13009533	6.38766
chr2R	13011517	13011958	7.88473
chr2R	13012566	13012908	11.8821
chr2R	13014096	13014545	2.73767
chr2R	13015585	13015940	8.38868
chr2R	13016893	13017537	2.15969
chr2R	13020211	13020637	3.78104
chr2R	13021678	13021971	4.63371
chr2R	13023488	13024382	5.96704
chr2R	13025601	13025818	10.9416
chr2R	13029600	13030186	8.98176
chr2R	13032985	13033399	4.09331
chr2R	13038225	13038600	3.80098
chr2R	13040345	13041121	6.33371
chr2R	13042476	13042831	12.1937
chr2R	13114843	13115091	3.1413
chr2R	13119475	13119706	9.24023
chr2R	13591065	13591273	12.4623
chr2R	13814273	13814576	2.79469
chr2R	13905974	13906260	4.98312
chr2R	14189157	14189654	6.65775
chr2R	14189976	14190176	6.97589
chr2R	14199171	14199372	5.72672
chr2R	14200575	14200856	3.11565
chr2R	14201595	14202125	6.42353
chr2R	14202432	14202686	4.64978
chr2R	14203360	14203833	10.4469
chr2R	14204689	14205225	20.5203
chr2R	14205489	14205833	7.15685
chr2R	14206054	14206420	2.03422
chr2R	14206642	14206902	11.5877
chr2R	14207155	14208023	5.42566
chr2R	14210545	14210752	3.54353
chr2R	14213498	14214154	9.07577
chr2R	14226578	14226800	5.92939
chr2R	14445690	14445918	4.717
chr2R	14449766	14450350	3.12571
chr2R	14451371	14451780	11.3265
chr2R	14452196	14452503	2.58157
chr2R	14453604	14454141	4.86669
chr2R	14454273	14454561	8.74011
chr2R	14454878	14455088	3.67553
chr2R	14455551	14455800	4.67256
chr2R	14456779	14457307	2.47477
chr2R	14458441	14458816	9.83517
chr2R	14459723	14460809	5.19325
chr2R	14460979	14461474	3.32482
chr2R	14461589	14461836	6.97723
chr2R	14462094	14465176	9.2893
chr2R	14465957	14466810	6.33605
chr2R	14476535	14477164	5.3759
chr2R	14477502	14477702	22.3504
chr2R	14478293	14478652	2.76392
chr2R	14479307	14480094	7.22692
chr2R	14643239	14643439	26.4552
chr2R	14656954	14657296	3.67588
chr2R	14784899	14785196	8.84498
chr2R	14789327	14789683	11.7352
chr2R	14794472	14794725	5.21101
chr2R	14795114	14795379	6.35585
chr2R	14796798	14797231	11.6065
chr2R	14798213	14798992	10.1737
chr2R	14800214	14801009	2.85325
chr2R	14801831	14802108	6.81974
chr2R	14802785	14803229	4.74864
chr2R	14807765	14807965	10.4899
chr2R	14809900	14810207	19.1675
chr2R	14811864	14812147	3.49777
chr2R	14812281	14812638	2.43947
chr2R	14814722	14815165	6.10047
chr2R	14830695	14830895	3.6411
chr2R	14889554	14889993	5.43152
chr2R	14890386	14890794	11.6451
chr2R	15242981	15243279	23.3739
chr2R	15327822	15328103	4.80545
chr2R	15331304	15331708	6.27781
chr2R	15335832	15336037	6.89664
chr2R	15362122	15362353	15.8496
chr2R	15405325	15405558	13.5447
chr2R	15427800	15428058	9.9998
chr2R	15592119	15592337	10.6349
chr2R	15743777	15744011	4.85362
chr2R	15822238	15822442	6.31308
chr2R	15825645	15826201	6.21486
chr2R	15827109	15827993	4.48915
chr2R	15828825	15829041	5.94487
chr2R	15829447	15829955	3.89335
chr2R	15831249	15831685	2.23456
chr2R	15832247	15832564	5.13171
chr2R	15833649	15834127	19.686
chr2R	15835944	15836395	4.27997
chr2R	15836623	15837214	5.77526
chr2R	15837803	15838292	3.59013
chr2R	15838409	15839423	7.7497
chr2R	15840076	15840367	6.77903
chr2R	15903995	15904248	17.7523
chr2R	16167665	16167883	7.99663
chr2R	16306420	16306698	8.4693
chr2R	16496988	16497199	11.6351
chr2R	16512297	16512703	4.10175
chr2R	16672528	16672734	5.31613
chr2R	16823229	16823496	18.6739
chr2R	16892710	16892926	23.0552
chr2R	17152923	17153170	22.5077
chr2R	17389420	17389640	2.98629
chr2R	17403878	17404110	23.9813
chr2R	17754894	17755144	8.59405
chr2R	17819731	17820199	15.8667
chr2R	17820468	17820739	3.60358
chr2R	17820863	17821473	7.1294
chr2R	17827766	17827982	4.34621
chr2R	17838971	17839183	12.3243
chr2R	18219122	18219354	8.67303
chr2R	18243923	18244177	2.90332
chr2R	18258058	18258438	17.8847
chr2R	18338531	18338742	10.3461
chr2R	18827260	18827488	19.4862
chr2R	19127667	19127962	7.68872
chr2R	19417276	19417478	7.88612
chr2R	19746192	19746393	9.84973
chr2R	19747240	19747450	12.1034
chr2R	19749819	19750023	11.2635
chr2R	19753112	19753312	9.08698
chr2R	19757096	19757353	11.734
chr2R	20049277	20049483	18.2847
chr2R	20261830	20262037	5.28844
chr2R	20693692	20693895	28.2841
chr2R	20768132	20768369	22.2552
chr2R	20871639	20871857	22.0038
chr2R	20890615	20890825	5.45753
chr2R	20899778	20900508	3.80247
chr2R	20900991	20901253	14.8318
chr2R	20902030	20902563	2.84183
chr2R	20902710	20903000	24.08
chr2R	20903427	20903824	4.87214
chr2R	20903944	20905980	5.73896
chr2R	20908553	20908834	4.32944
chr2R	20909921	20910679	15.0352
chr2R	20911120	20911608	5.95886
chr2R	20911788	20913204	10.3361
chr2R	20913497	20913854	14.1057
chr2R	20914749	20915385	3.31993
chr2R	20917043	20917549	14.3156
chr2R	20917878	20918576	7.51829
chr2R	20918715	20918950	4.65483
chr2R	20919067	20920144	5.90862
chr2R	20921153	20921953	8.11742
chr2R	20922188	20923464	7.1412
chr2R	20923999	20924265	2.34004
chr2R	20925123	20925602	18.1267
chr2R	20927284	20927576	9.98312
chr2R	20928751	20929010	5.2027
chr2R	20940909	20941243	12.0568
chr2R	20944849	20945126	3.92413
chr2R	20945382	20946037	3.29409
chr2R	20946946	20947298	4.49306
chr2R	20948466	20948671	3.19507
chr2R	20948902	20949292	22.0607
chr2R	20949526	20950189	6.01972
chr2R	20950557	20950890	3.6363
chr2R	20951750	20952462	4.63138
chr2R	20952879	20953093	2.54152
chr2R	20953494	20953771	2.48588
chr2R	20953960	20954298	7.67978
chr2R	20954891	20955091	3.19932
chr2R	20955213	20955598	3.03695
chr2R	20956050	20956571	3.63141
chr2R	20958302	20958872	3.16758
chr2R	20959827	20960031	2.14548
chr2R	20960372	20960666	5.96838
chr2R	20962065	20962623	2.76727
chr2R	20963051	20964196	2.73559
chr2R	20964575	20965359	3.83313
chr2R	20965528	20965745	20.6624
chr2R	20966202	20966524	5.95926
chr2R	20966739	20967044	2.2116
chr2R	20968341	20968673	6.492
chr2R	20969155	20969461	3.85616
chr2R	20970409	20970797	3.01462
chr2R	20975449	20975817	6.4529
chr2R	20990871	20991121	6.24718
chr2R	21369573	21369801	10.3052
chr2R	21490773	21491113	10.2807
chr2R	21710177	21710377	1.32617
chr2R	21843662	21843954	9.09951
chr2R	22057243	22057504	10.6491
chr2R	22103704	22103908	21.6105
chr2R	22238901	22239496	16.8271
chr2R	22239722	22240818	2.80317
chr2R	22241460	22241899	5.25166
chr2R	22245230	22245454	2.58528
chr2R	22248998	22249309	2.74973
chr2R	22262286	22262577	10.8252
chr2R	22271547	22272000	14.9052
chr2R	22280746	22280986	11.2618
chr2R	22574157	22574357	20.4706
chr2R	22859845	22860260	4.80882
chr2R	22861814	22862289	2.73732
chr2R	22863071	22863273	7.16146
chr2R	22865643	22865914	4.73856
chr2R	22866288	22866973	4.95435
chr2R	22868180	22868795	6.64788
chr2R	22869108	22870179	4.81469
chr2R	23046441	23048175	4.26416
chr2R	23048334	23048606	3.23239
chr2R	23049806	23050392	4.13556
chr2R	23050905	23051145	15.4214
chr2R	23056856	23057062	7.13118
chr2R	23248506	23248791	7.89983
chr2R	23339849	23340179	3.77601
chr2R	23463459	23463659	15.7854
chr2R	23620011	23620807	5.27414
chr2R	23621877	23622218	2.36271
chr2R	23622378	23622659	4.40229
chr2R	23622922	23623255	4.27126
chr2R	23623360	23623627	6.94811
chr2R	23623783	23624095	3.3164
chr2R	23624724	23625527	2.78169
chr2R	23626286	23626653	7.57262
chr2R	23629260	23629838	2.94542
chr2R	23630240	23630440	2.52239
chr2R	23630914	23631911	6.69492
chr2R	23632843	23633085	3.24436
chr2R	23634065	23634265	6.98724
chr2R	23635084	23635597	6.31737
chr2R	23637327	23637713	4.36003
chr2R	23640053	23640296	10.5284
chr2R	23643221	23643741	12.2843
chr2R	23644378	23644723	5.25052
chr2R	23996565	23996893	15.3519
chr2R	24347347	24347549	25.4085
chr2R	24371652	24371997	19.2226
chr2R	24495094	24495305	5.14666
chr2R	24799014	24799232	6.57527
chr2R	24800550	24800949	2.31206
chr2R	24802186	24802527	3.05785
chr2R	24803470	24803687	4.27521
chr2R	24803807	24804064	4.70904
chr2R	24804542	24804951	2.53692
chr2R	24805996	24807547	5.0909
chr2R	24808156	24809053	4.90279
chr2R	24809173	24809868	3.49866
chr2R	24811237	24811966	7.00534
chr2R	24812906	24813555	6.29889
chr2R	24815215	24815788	6.88725
chr2R	24816689	24816953	6.31282
chr2R	24817473	24818032	11.087
chr2R	24819445	24820018	7.76178
chr2R	24821139	24821527	4.36487
chr2R	24822912	24823159	4.55605
chr2R	24823329	24823529	5.09456
chr2R	24827781	24828287	6.19319
chr2R	24828902	24829181	5.3333
chr2R	24836118	24836499	4.87156
chr2R	24841985	24842616	4.79955
chr2R	24843762	24844149	6.79333
chr2R	24846389	24846621	13.5565
chr2R	24846974	24847286	5.50559
chr2R	24848045	24848358	3.21533
chr2R	24849106	24849379	2.43118
chr2R	24850134	24850531	3.95402
chr2R	24851237	24851437	5.67493
chr2R	24852684	24852959	7.08304
chr2R	24853891	24854346	6.832
chr2R	24854816	24855063	3.16425
chr2R	24856886	24857101	3.36314
chr2R	25042343	25042547	10.8273
chr2R	25048160	25048465	6.28996
chr2R	25051021	25051616	6.50228
chr2R	25052529	25053025	5.25031
chr2R	25053387	25053732	5.34243
chr2R	25055556	25056602	10.2333
chr2R	25057084	25057861	3.72318
chr2R	25059508	25059950	7.30606
chr2R	25060415	25060627	3.70364
chr2R	25060754	25061368	3.4786
chr2R	25062299	25062685	6.27809
chr2R	25063236	25063828	4.5475
chr2R	25063938	25064514	8.30422
chr2R	25066026	25066301	14.8769
chr2R	25066891	25067472	3.69702
chr2R	25067649	25067903	3.74013
chr2R	25068814	25069085	2.2377
chr2R	25069663	25069900	3.34061
chr2R	25070637	25071205	17.498
chr2R	25097382	25097680	4.06283
chr2R	25102720	25103040	2.41085
chr2R	25112723	25112928	7.07412
chr2R	25117929	25118207	3.15159
chr2R	25263922	25264148	8.25145
chr2R	25265992	25266425	6.69091
chr2R	25283591	25283801	12.892
chr2R	25284032	25284367	10.0925
chr2R	25285487	25285746	10.7124
chr3L	250	688	14.6265
chr3L	4395	4698	2.83266
chr3L	6257	6513	7.23841
chr3L	7286	7824	11.3981
chr3L	8237	8507	9.42929
chr3L	10078	10278	3.44079
chr3L	10615	11319	9.3906
chr3L	13035	13245	23.9805
chr3L	13899	14297	5.93996
chr3L	18132	18484	4.04904
chr3L	19195	19602	10.3723
chr3L	22678	23007	9.90745
chr3L	367878	368195	11.0221
chr3L	368555	369113	2.80016
chr3L	369250	369584	4.88042
chr3L	369896	370324	7.35333
chr3L	370611	371203	6.79972
chr3L	371765	372106	4.72979
chr3L	373124	373486	5.63226
chr3L	373655	374656	8.67349
chr3L	376291	377450	5.38971
chr3L	378533	379082	6.48916
chr3L	379236	379702	12.2965
chr3L	381650	381937	24.4349
chr3L	382420	383549	5.46941
chr3L	384822	385188	3.39298
chr3L	389910	390349	4.43292
chr3L	390691	390951	3.45491
chr3L	391398	391633	23.2738
chr3L	399797	400220	12.2642
chr3L	400944	401168	4.45356
chr3L	410845	411058	3.1515
chr3L	413990	414190	4.02009
chr3L	415309	415565	4.39542
chr3L	417838	418063	25.3854
chr3L	419585	419800	4.97617
chr3L	427219	427517	25.0376
chr3L	429573	429777	5.27042
chr3L	433460	433668	10.2589
chr3L	729289	729491	22.6078
chr3L	896034	896373	13.4145
chr3L	1100235	1100652	24.462
chr3L	1107566	1107804	4.58107
chr3L	1180023	1180315	2.16332
chr3L	1293672	1293875	11.0398
chr3L	1315290	1315524	4.5479
chr3L	1353331	1353575	4.25301
chr3L	1358020	1358337	5.71487
chr3L	1360229	1360545	6.78117
chr3L	1361867	1362252	6.88222
chr3L	1363357	1363659	6.57998
chr3L	1366034	1366367	10.7428
chr3L	1424254	1424454	3.08574
chr3L	1433838	1434116	2.52297
chr3L	1441894	1442107	7.17454
chr3L	1453819	1454186	11.6395
chr3L	1459340	1459833	11.0363
chr3L	1460843	1461096	6.15697
chr3L	1465393	1465631	7.04498
chr3L	1476671	1477049	2.37767
chr3L	1536191	1536446	20.1833
chr3L	1895146	1895504	12.7423
chr3L	1916990	1917240	11.2428
chr3L	1917986	1918299	5.98859
chr3L	1918407	1918831	9.26264
chr3L	1921433	1921875	3.24629
chr3L	1923318	1923616	14.662
chr3L	1924552	1924794	2.59255
chr3L	1926097	1926358	6.42968
chr3L	2065047	2065426	5.82228
chr3L	2395661	2395867	7.41716
chr3L	2630171	2630463	3.63894
chr3L	2713460	2713737	4.54098
chr3L	3014932	3015243	3.59563
chr3L	3622749	3623010	6.4159
chr3L	3627938	3628320	14.4314
chr3L	3629930	3630130	1.93654
chr3L	3635753	3636215	6.20011
chr3L	3641158	3641403	10.9372
chr3L	3643453	3643658	24.566
chr3L	3844398	3844767	9.91059
chr3L	3846946	3847185	4.29856
chr3L	3848780	3849051	3.34779
chr3L	3852539	3852793	2.00002
chr3L	3853233	3853435	3.98513
chr3L	3863022	3863238	6.92558
chr3L	3866803	3867104	12.6968
chr3L	3869772	3870119	5.99305
chr3L	3870378	3870606	3.93876
chr3L	3876688	3877091	4.97938
chr3L	3877724	3877966	4.35583
chr3L	3879338	3879800	4.05105
chr3L	3880265	3880618	3.99732
chr3L	3882757	3882976	7.28417
chr3L	4019184	4019463	2.98832
chr3L	4151179	4151537	5.35347
chr3L	4155719	4156107	6.53568
chr3L	4156265	4156491	3.6536
chr3L	4157166	4157560	3.244
chr3L	4157826	4158135	6.08104
chr3L	4160273	4160787	3.7059
chr3L	4161760	4162585	6.00451
chr3L	4162722	4162945	2.3608
chr3L	4163994	4164198	28.1174
chr3L	4215989	4216215	5.59054
chr3L	4328970	4329201	4.34225
chr3L	4638322	4638616	4.0546
chr3L	4666537	4666767	5.80502
chr3L	4994961	4995282	8.18816
chr3L	5116470	5116689	3.1324
chr3L	5618874	5619193	18.3092
chr3L	5635090	5635333	11.8285
chr3L	5836630	5836934	7.43289
chr3L	5842567	5842783	4.12161
chr3L	5849530	5849736	4.61782
chr3L	5853825	5854027	15.0428
chr3L	5854620	5854869	5.30291
chr3L	5860053	5860280	3.90331
chr3L	5862355	5862673	3.82179
chr3L	5864203	5864403	19.9704
chr3L	5880010	5880284	2.96166
chr3L	5880919	5881231	4.04604
chr3L	5952787	5952987	4.70987
chr3L	6007692	6007902	6.79885
chr3L	6313710	6313910	3.3353
chr3L	6765703	6765965	11.3552
chr3L	6766496	6766700	4.17964
chr3L	6775549	6775856	14.0848
chr3L	6784965	6785271	1.46641
chr3L	6786218	6786879	3.70587
chr3L	6787378	6787736	4.45613
chr3L	6790700	6791135	3.60912
chr3L	6791331	6791561	10.7068
chr3L	6792542	6793048	13.2331
chr3L	6799130	6799352	21.7588
chr3L	6816956	6817159	4.95524
chr3L	6843371	6843658	4.17377
chr3L	6902129	6902329	1.96762
chr3L	6903004	6903243	4.26298
chr3L	6990956	6991614	8.10377
chr3L	7500071	7500278	9.72182
chr3L	7566887	7567207	14.7865
chr3L	7676784	7677224	9.47999
chr3L	7947334	7947931	7.21184
chr3L	7948510	7948813	4.79502
chr3L	7948950	7949364	3.88738
chr3L	7949623	7949946	2.39993
chr3L	7950588	7950995	2.53483
chr3L	8314001	8314228	7.98439
chr3L	8756642	8756916	4.54217
chr3L	9003560	9003976	8.18482
chr3L	9005540	9006381	4.91787
chr3L	9006628	9007089	4.04394
chr3L	9007251	9007722	8.89306
chr3L	9007943	9008269	11.1113
chr3L	9008391	9008720	5.08658
chr3L	9008974	9009708	4.42098
chr3L	9010618	9010838	3.69218
chr3L	9012877	9013265	5.76384
chr3L	9013407	9013923	4.36234
chr3L	9015373	9015814	3.04777
chr3L	9016591	9016947	7.10933
chr3L	9017091	9017694	3.79514
chr3L	9018235	9019230	2.93315
chr3L	9020177	9020587	18.3816
chr3L	9021491	9021851	13.0054
chr3L	9022344	9022566	2.69974
chr3L	9023737	9024335	10.9347
chr3L	9024922	9025147	11.9337
chr3L	9025728	9026396	9.88495
chr3L	9026905	9027294	9.44402
chr3L	9027407	9027691	7.73976
chr3L	9029233	9029586	6.00786
chr3L	9030129	9030375	3.64255
chr3L	9031296	9031689	5.92155
chr3L	9032643	9032964	2.96319
chr3L	9033202	9033585	5.05337
chr3L	9033934	9034232	1.72317
chr3L	9037782	9037996	2.94334
chr3L	9038966	9039487	3.26999
chr3L	9039589	9039870	10.3167
chr3L	9040452	9040835	5.82935
chr3L	9042995	9043311	4.28807
chr3L	9625526	9625826	6.3206
chr3L	9784683	9784897	7.51261
chr3L	10226932	10227175	4.44081
chr3L	10227355	10227682	5.55481
chr3L	10232550	10232789	4.8345
chr3L	10240411	10240687	12.5771
chr3L	10245401	10245646	3.70676
chr3L	10250450	10250706	4.84435
chr3L	10283599	10283930	17.6436
chr3L	10285726	10286096	24.9753
chr3L	10287222	10287507	2.07572
chr3L	10288158	10288524	4.53626
chr3L	10289575	10289781	4.8863
chr3L	10291255	10291866	2.74612
chr3L	10293595	10293872	3.95725
chr3L	10295448	10295884	12.9499
chr3L	10305846	10306106	12.2055
chr3L	10316840	10317177	11.9092
chr3L	10768016	10768216	15.6636
chr3L	11004805	11005005	3.51123
chr3L	11011635	11012086	4.25786
chr3L	11012325	11012950	6.36005
chr3L	11014706	11015215	7.43224
chr3L	11303501	11303701	5.22749
chr3L	11478582	11478814	7.50332
chr3L	11613240	11613506	16.8662
chr3L	11895980	11896197	6.34023
chr3L	11921661	11921899	7.1658
chr3L	11922775	11923049	4.11297
chr3L	11923175	11924492	4.30069
chr3L	11925215	11926306	6.77143
chr3L	11928610	11929032	2.75886
chr3L	11930868	11931068	14.4867
chr3L	11934160	11934614	4.84742
chr3L	11936041	11936382	15.2976
chr3L	11937948	11938262	4.15168
chr3L	12307915	12308119	5.07691
chr3L	12325500	12325732	6.23292
chr3L	12327078	12327863	10.7392
chr3L	12328489	12328801	20.8464
chr3L	12329932	12330132	4.17994
chr3L	12427312	12427771	7.43348
chr3L	12428760	12428969	4.40564
chr3L	12430994	12431256	22.7348
chr3L	12432004	12432225	8.70762
chr3L	12433631	12433846	2.75717
chr3L	12435378	12435845	6.27962
chr3L	12436482	12437058	6.5875
chr3L	12437506	12437869	4.05801
chr3L	12439422	12439719	3.29332
chr3L	12440167	12440395	21.2233
chr3L	12440978	12441373	8.6855
chr3L	12446520	12446734	18.5718
chr3L	12449354	12449710	4.89584
chr3L	12452505	12452746	3.13657
chr3L	12458949	12459205	9.12793
chr3L	12464324	12464841	5.68221
chr3L	12465046	12465254	3.71434
chr3L	12465753	12466249	5.63639
chr3L	12468988	12469706	4.46949
chr3L	12470330	12470734	4.28942
chr3L	12553888	12554127	4.45971
chr3L	12559487	12559795	3.98151
chr3L	12577648	12577973	18.5208
chr3L	12578413	12579004	2.35998
chr3L	12580897	12581138	10.8769
chr3L	12581827	12582401	3.16545
chr3L	12583527	12583748	2.94124
chr3L	12584086	12584403	3.40659
chr3L	12584606	12584819	8.13665
chr3L	12585081	12585299	1.69703
chr3L	12585721	12586269	5.95578
chr3L	12597935	12598232	9.24524
chr3L	12602383	12602735	12.5054
chr3L	12606489	12606789	17.8668
chr3L	12610426	12610787	6.06868
chr3L	12611762	12612366	6.84315
chr3L	12612535	12612868	21.7745
chr3L	12614077	12614400	7.94696
chr3L	12617065	12617340	6.548
chr3L	12618549	12618842	16.374
chr3L	12627249	12627453	3.76132
chr3L	12639414	12639614	6.52039
chr3L	12647575	12648060	8.14588
chr3L	12652140	12652811	3.06217
chr3L	12654678	12655037	3.22694
chr3L	12656115	12656502	9.90674
chr3L	12657869	12659141	4.98429
chr3L	12659698	12659981	5.95016
chr3L	12661719	12662221	7.25772
chr3L	12669259	12669664	14.4936
chr3L	12670388	12670815	4.6142
chr3L	12673075	12673476	10.0213
chr3L	12675807	12676061	3.59847
chr3L	12682401	12682868	9.86734
chr3L	12683584	12683809	5.319
chr3L	12685690	12685973	3.05664
chr3L	12687687	12688163	7.42987
chr3L	12688427	12689000	4.37219
chr3L	12690261	12690532	22.8096
chr3L	12690700	12691202	9.32952
chr3L	12692207	12692457	5.24811
chr3L	12695198	12695726	9.98073
chr3L	12696496	12697035	15.7971
chr3L	12708438	12709152	6.89006
chr3L	12920703	12920985	7.4528
chr3L	12923564	12923813	5.10445
chr3L	13399059	13400212	7.86076
chr3L	13402497	13403057	3.49572
chr3L	13404674	13405118	5.48798
chr3L	13405433	13405748	1.45097
chr3L	13406182	13406951	7.44357
chr3L	13407248	13407477	4.21985
chr3L	13579660	13579990	5.75672
chr3L	13669009	13669270	5.56391
chr3L	13673076	13673276	5.96115
chr3L	14119965	14120197	3.39588
chr3L	14120479	14120815	3.78606
chr3L	14121350	14121752	17.9856
chr3L	14125043	14125253	25.4262
chr3L	14125521	14125784	3.259
chr3L	14128125	14128469	3.18239
chr3L	14133799	14134447	3.77256
chr3L	14135427	14135905	8.13835
chr3L	14137269	14137537	4.96282
chr3L	14142656	14142888	7.77304
chr3L	14144311	14144852	6.30941
chr3L	14161151	14161358	5.60334
chr3L	14171628	14171904	2.20031
chr3L	14173193	14173423	9.61651
chr3L	14174270	14174481	10.3134
chr3L	14176351	14176751	1.74036
chr3L	14180402	14180602	1.98093
chr3L	14181632	14181838	11.2036
chr3L	14184349	14184678	7.16861
chr3L	14376029	14376249	22.3403
chr3L	14572205	14572504	27.6307
chr3L	14575365	14575625	10.0683
chr3L	14576452	14576892	16.3622
chr3L	14577357	14577681	2.59578
chr3L	14579992	14580660	4.05879
chr3L	14580887	14581121	7.20357
chr3L	14581966	14582248	4.52516
chr3L	14582803	14583068	4.48154
chr3L	14589905	14590119	4.14334
chr3L	14597863	14598957	5.72793
chr3L	15018242	15018878	2.68305
chr3L	15020756	15020957	17.4919
chr3L	15036665	15037021	12.8185
chr3L	15040723	15041051	3.40093
chr3L	15041713	15042351	9.42638
chr3L	15042942	15043752	2.19734
chr3L	15101674	15101874	6.19005
chr3L	15136012	15136339	4.68039
chr3L	15237320	15237582	7.22206
chr3L	15332293	15332936	12.0849
chr3L	15423891	15424114	8.27847
chr3L	15562188	15562388	23.933
chr3L	15662680	15662970	9.82398
chr3L	15790626	15790826	16.6722
chr3L	16029549	16029776	18.0372
chr3L	16224613	16224818	10.5397
chr3L	16418325	16418600	4.98123
chr3L	16527675	16527887	3.9513
chr3L	16800090	16800291	9.08153
chr3L	17222865	17223101	22.1191
chr3L	17330698	17330901	26.3141
chr3L	17918734	17918960	21.3702
chr3L	18375632	18375928	8.07021
chr3L	18422809	18423016	18.8202
chr3L	18447869	18448110	7.55074
chr3L	18506394	18506594	4.50678
chr3L	18657627	18657907	22.1094
chr3L	18852122	18852363	10.4284
chr3L	18853195	18853450	6.262
chr3L	18857356	18857557	6.73744
chr3L	18859190	18859535	5.12117
chr3L	18860473	18860686	5.59203
chr3L	19051458	19051737	9.31271
chr3L	19472174	19472430	11.1969
chr3L	19613853	19614065	15.6807
chr3L	19657147	19657430	4.64966
chr3L	19662920	19663437	21.8847
chr3L	19664659	19665719	2.85015
chr3L	19665868	19666222	2.42199
chr3L	19666614	19667281	10.9169
chr3L	19667909	19668241	4.61857
chr3L	19668890	19669339	6.15595
chr3L	19670216	19670487	7.72433
chr3L	19670647	19670847	7.50616
chr3L	19671474	19671706	7.99358
chr3L	19672803	19673301	14.5675
chr3L	19673954	19674273	7.83167
chr3L	19675634	19675836	4.28757
chr3L	19677186	19677399	4.97412
chr3L	19678559	19678885	6.25335
chr3L	19679058	19679364	9.95832
chr3L	19679618	19679998	9.49196
chr3L	19681009	19681498	3.92263
chr3L	19681762	19681991	3.53395
chr3L	19682620	19682844	9.8226
chr3L	19690629	19690844	8.23619
chr3L	19692470	19692736	7.73259
chr3L	19882744	19883016	7.27536
chr3L	20151729	20151959	21.219
chr3L	20515799	20516002	7.22975
chr3L	20613981	20614275	4.42797
chr3L	20615261	20615829	15.2871
chr3L	20619456	20619679	6.51969
chr3L	20622986	20623421	6.96997
chr3L	20624459	20624772	4.45426
chr3L	20625783	20626425	4.50511
chr3L	20628176	20628519	10.0591
chr3L	20631887	20632236	4.09706
chr3L	20637767	20638020	9.73188
chr3L	20640282	20640589	3.89933
chr3L	20653124	20653326	3.06604
chr3L	20673858	20674058	15.7754
chr3L	20679383	20679606	6.22877
chr3L	20692731	20693331	3.70256
chr3L	20693559	20694199	8.06884
chr3L	20694307	20694684	5.71125
chr3L	20697379	20697639	3.66894
chr3L	20699160	20699423	3.4108
chr3L	20701943	20702350	3.38701
chr3L	20705778	20706152	18.2659
chr3L	20706677	20707058	2.82722
chr3L	20746197	20746403	11.3908
chr3L	20786793	20787099	22.6104
chr3L	20790360	20790649	5.81099
chr3L	20794929	20795263	9.20872
chr3L	20795874	20796397	7.84608
chr3L	20797423	20798436	8.0787
chr3L	21450515	21450718	11.3142
chr3L	21455943	21456260	8.18471
chr3L	21456682	21456883	6.12137
chr3L	21457003	21457247	4.58556
chr3L	21457514	21457902	11.9388
chr3L	21458492	21459190	6.17011
chr3L	21459397	21459677	9.1642
chr3L	21460168	21460522	2.28227
chr3L	21460671	21461270	14.7841
chr3L	21461560	21461840	11.0112
chr3L	21462638	21463014	4.96852
chr3L	21463538	21464038	6.01665
chr3L	21464377	21464607	2.92075
chr3L	21466182	21466601	3.05919
chr3L	21466716	21466949	10.8453
chr3L	21467910	21468339	5.79061
chr3L	21468778	21469147	6.95185
chr3L	21469532	21469972	7.17008
chr3L	21470309	21470779	3.33225
chr3L	21471220	21471762	3.3809
chr3L	21472235	21472498	5.69504
chr3L	21472844	21473530	4.82678
chr3L	21473799	21474106	12.7236
chr3L	21474605	21476192	2.93658
chr3L	21477084	21477428	15.4619
chr3L	21477777	21478069	27.6024
chr3L	21478322	21478834	5.11434
chr3L	21480182	21480855	3.06441
chr3L	21481007	21481534	9.74321
chr3L	21481884	21482119	5.59957
chr3L	21482226	21482472	5.09397
chr3L	21580216	21580477	5.92306
chr3L	21581687	21581965	6.43712
chr3L	21582533	21582815	8.82483
chr3L	21583026	21583900	4.35989
chr3L	21585973	21586902	6.73148
chr3L	21587789	21588038	19.19
chr3L	21591518	21592236	5.72894
chr3L	21594226	21594702	3.67625
chr3L	21594852	21595264	8.06835
chr3L	21595795	21596242	8.68589
chr3L	21596637	21597008	3.82007
chr3L	21597827	21598236	4.16157
chr3L	21598892	21599966	4.46743
chr3L	21600830	21601195	17.3011
chr3L	21601465	21602244	7.06826
chr3L	21602605	21602938	2.55
chr3L	21609424	21609665	2.39783
chr3L	21631148	21631487	9.7887
chr3L	21782405	21782974	13.986
chr3L	21791511	21791740	3.15861
chr3L	21795484	21795982	6.02817
chr3L	21799219	21799444	13.0502
chr3L	21801455	21802146	4.22226
chr3L	21802495	21802894	2.13352
chr3L	21803785	21804397	3.75808
chr3L	21804525	21804844	3.65184
chr3L	21804959	21805370	4.15225
chr3L	21806737	21807593	7.95207
chr3L	21809654	21810263	5.75682
chr3L	21810995	21811218	3.41849
chr3L	21811556	21812053	4.86769
chr3L	21815116	21815618	8.44335
chr3L	21816443	21817190	3.47636
chr3L	21819363	21819614	3.23602
chr3L	22083097	22083341	5.46741
chr3L	22360935	22361135	6.37848
chr3L	22577821	22578169	8.2366
chr3L	22703172	22703394	4.23373
chr3L	23113673	23114153	15.9173
chr3L	23114723	23114944	12.6853
chr3L	23115647	23116229	16.2789
chr3L	23116443	23116986	25.6286
chr3L	23355311	23355544	4.2003
chr3L	23374765	23375037	15.873
chr3L	23388232	23388447	21.0413
chr3L	23519772	23520026	10.1662
chr3L	23915178	23915387	3.42502
chr3L	24003457	24003743	7.76794
chr3L	24101242	24101712	10.9322
chr3L	24105745	24105948	5.51363
chr3L	24659287	24659608	7.39276
chr3L	24822362	24822607	5.24972
chr3L	24929277	24929643	10.3724
chr3L	25052895	25053173	7.84945
chr3L	25053577	25053802	12.2867
chr3L	25130063	25130268	7.35322
chr3L	25131292	25131739	23.1898
chr3L	25132362	25133065	13.7854
chr3L	25133769	25134451	19.989
chr3L	25193012	25193531	2.6479
chr3L	25338906	25339151	4.33775
chr3L	25371559	25371805	7.91382
chr3L	25542933	25543135	7.3953
chr3L	25571090	25571377	15.0862
chr3L	25629052	25629353	9.70762
chr3L	25650136	25650336	7.10302
chr3L	26094342	26094582	3.65109
chr3L	26095191	26095391	9.91711
chr3L	26102603	26102813	24.1044
chr3L	26151441	26151642	2.68422
chr3L	26359647	26359889	6.90702
chr3L	26594158	26594488	4.04053
chr3L	26598219	26598623	4.40867
chr3L	26777721	26778026	5.9367
chr3L	26828138	26828386	5.81586
chr3L	27044557	27044843	9.43822
chr3L	27048386	27048590	8.09106
chr3L	27069231	27069444	25.6253
chr3L	27109004	27109205	8.74747
chr3L	27186794	27186994	3.28748
chr3L	27433230	27433430	20.3779
chr3L	27621540	27621827	5.26783
chr3L	27621996	27622202	6.86129
chr3L	27623379	27623668	9.83115
chr3L	27624151	27624552	6.14712
chr3L	27712019	27712219	4.39622
chr3L	27728189	27728616	6.84148
chr3L	27775059	27775564	8.22721
chr3L	27804523	27804733	4.11292
chr3R	27513	27744	6.20736
chr3R	41001	41265	21.7783
chr3R	42105	42477	2.42867
chr3R	167297	167512	12.4634
chr3R	261417	261790	3.71957
chr3R	262118	262318	4.99293
chr3R	266621	266845	3.97413
chr3R	281300	281538	5.05531
chr3R	316096	316618	9.98876
chr3R	317015	317215	12.5199
chr3R	322306	322507	3.75892
chr3R	323535	323784	5.28584
chr3R	505013	505230	5.0741
chr3R	505612	505814	7.28821
chr3R	777074	777276	3.53501
chr3R	788107	788313	3.31692
chr3R	816226	816473	19.1937
chr3R	987926	988196	11.0901
chr3R	1186411	1186611	2.98209
chr3R	1190285	1190507	4.97902
chr3R	1289359	1289559	8.50268
chr3R	1364677	1365032	7.50354
chr3R	1506409	1506615	3.38983
chr3R	1643080	1643362	5.37716
chr3R	1749814	1750047	10.7131
chr3R	1751868	1752114	13.8494
chr3R	1753454	1753752	5.45536
chr3R	1753986	1754198	3.85011
chr3R	1942930	1943335	10.828
chr3R	2088040	2088385	2.58223
chr3R	2104014	2104281	15.9752
chr3R	2354086	2354577	17.5789
chr3R	2620294	2620533	5.70601
chr3R	2725952	2726153	18.1419
chr3R	2865282	2865537	4.1018
chr3R	3020641	3020896	4.65789
chr3R	3033368	3033790	14.9287
chr3R	3098121	3098321	15.2193
chr3R	3169916	3170364	28.9412
chr3R	3197962	3198162	7.04355
chr3R	3384478	3384730	6.93913
chr3R	3403479	3403816	3.62651
chr3R	3408066	3408293	6.60747
chr3R	3770816	3771048	11.6422
chr3R	3805281	3805521	11.1432
chr3R	4016448	4016653	12.9314
chr3R	4344267	4344467	2.93233
chr3R	4345435	4345705	2.6645
chr3R	4345858	4346115	10.6993
chr3R	4346237	4346543	10.0607
chr3R	4347221	4347860	4.91548
chr3R	4349948	4350175	16.9803
chr3R	4352462	4352664	20.6234
chr3R	4353539	4353779	3.0188
chr3R	4359765	4359988	9.68227
chr3R	4825169	4825522	3.66985
chr3R	4827462	4827748	13.6757
chr3R	4829134	4829563	13.3244
chr3R	4830080	4830329	3.60858
chr3R	4834707	4835087	2.77629
chr3R	4837063	4837498	7.27291
chr3R	4838801	4839084	14.6838
chr3R	4844971	4845210	5.67803
chr3R	4845456	4846177	7.59808
chr3R	4846378	4846715	12.3209
chr3R	4846969	4848426	5.52058
chr3R	4849170	4849539	9.83541
chr3R	4849953	4850688	14.4553
chr3R	4850862	4851469	6.39511
chr3R	4851956	4852304	5.62359
chr3R	4853186	4854080	4.62075
chr3R	4854295	4854579	3.56715
chr3R	4857064	4857552	7.80751
chr3R	4860411	4860975	7.79102
chr3R	4863794	4864479	7.31955
chr3R	4866164	4866365	5.33649
chr3R	4868981	4869224	2.27035
chr3R	4881479	4881685	3.21651
chr3R	4898114	4898320	5.5046
chr3R	4899908	4900170	34.506
chr3R	4909262	4909555	6.50531
chr3R	5140182	5140386	26.7136
chr3R	5274909	5275162	14.3286
chr3R	5338594	5339054	7.22511
chr3R	5339275	5339547	5.86268
chr3R	5341374	5341647	7.88326
chr3R	5342879	5343097	5.16824
chr3R	5718194	5718528	4.4891
chr3R	5722659	5723105	23.9741
chr3R	5725484	5725801	3.63913
chr3R	6418448	6418930	6.66274
chr3R	6500772	6501121	15.1471
chr3R	6613369	6613663	8.88074
chr3R	6622174	6622374	9.81117
chr3R	6666558	6666801	14.0043
chr3R	6672552	6672787	2.9264
chr3R	6674315	6674689	4.19396
chr3R	6675095	6675302	5.16015
chr3R	6676530	6676801	2.09613
chr3R	6677051	6678384	6.33028
chr3R	6679370	6679655	5.62994
chr3R	6679811	6680286	5.23572
chr3R	6681409	6682227	4.92347
chr3R	6684592	6685077	20.4006
chr3R	6727921	6728239	10.1346
chr3R	6731720	6731959	4.72116
chr3R	6736116	6736317	13.4252
chr3R	6739533	6739944	5.66277
chr3R	6743438	6744099	5.30989
chr3R	6746478	6746757	7.29519
chr3R	6751166	6751417	4.16258
chr3R	6752217	6752664	8.3938
chr3R	6757810	6758040	8.95639
chr3R	6781666	6781953	2.10271
chr3R	6783060	6783380	8.85721
chr3R	6783628	6784065	4.23388
chr3R	6785280	6785548	3.6756
chr3R	6787442	6787646	3.31947
chr3R	6787799	6787999	18.8371
chr3R	6789446	6789769	7.17561
chr3R	6790083	6790288	8.36656
chr3R	6790711	6791135	4.16302
chr3R	6792281	6792940	6.2212
chr3R	6793401	6794265	5.33151
chr3R	6794827	6795031	15.108
chr3R	6795623	6795986	4.73152
chr3R	6796428	6797362	3.91435
chr3R	6798479	6798826	4.24525
chr3R	6799124	6799324	3.53033
chr3R	6800783	6801384	5.57229
chr3R	6802959	6803485	2.19252
chr3R	6804544	6805081	5.09755
chr3R	6826365	6826608	23.9192
chr3R	6828305	6828577	8.50896
chr3R	6835499	6835825	5.05657
chr3R	6836901	6837175	10.5224
chr3R	6839808	6840127	12.5925
chr3R	6841187	6842152	10.3819
chr3R	6842539	6843302	7.65013
chr3R	6843445	6844210	4.23598
chr3R	6844671	6845786	11.0079
chr3R	6846558	6847325	3.51373
chr3R	6848047	6848312	12.4817
chr3R	6849577	6849865	4.28368
chr3R	6850251	6850729	3.13412
chr3R	6851372	6851729	4.65089
chr3R	6852119	6853359	5.88616
chr3R	6853469	6853836	8.99238
chr3R	6857591	6858060	7.04571
chr3R	6872297	6872640	3.94609
chr3R	6873137	6873686	3.95607
chr3R	6873890	6874325	7.08868
chr3R	6874528	6874734	4.75634
chr3R	6875283	6875901	5.49838
chr3R	6876412	6876689	4.91178
chr3R	6877709	6877909	4.27192
chr3R	6878489	6878974	4.61911
chr3R	6879414	6879888	1.95933
chr3R	6880303	6880790	7.56284
chr3R	6880932	6881410	4.89363
chr3R	6883357	6883559	4.37168
chr3R	6883946	6884236	7.13343
chr3R	6886812	6887265	2.94488
chr3R	6887679	6888031	3.61157
chr3R	6888545	6889104	4.99845
chr3R	6889489	6890055	4.87469
chr3R	6890504	6891139	5.01572
chr3R	6891818	6892499	5.95928
chr3R	6893895	6894203	6.33111
chr3R	6895558	6895832	5.84657
chr3R	6900962	6901805	7.77016
chr3R	6902352	6902684	7.31481
chr3R	6904073	6904533	5.80415
chr3R	6905064	6905565	4.08885
chr3R	6914253	6914461	5.16334
chr3R	6914732	6915000	3.98644
chr3R	6918159	6918616	5.73263
chr3R	6920003	6920332	9.91133
chr3R	6923115	6923433	6.0359
chr3R	6925989	6926410	4.22896
chr3R	6926885	6927303	10.377
chr3R	6929637	6929859	6.82841
chr3R	6932263	6932526	3.1317
chr3R	6934803	6935387	4.48341
chr3R	6936468	6936975	5.12891
chr3R	6943650	6943854	14.328
chr3R	6945944	6946246	3.91554
chr3R	6949907	6950107	3.38288
chr3R	6960823	6961117	4.14278
chr3R	6961994	6962301	4.60885
chr3R	6979874	6980846	8.9125
chr3R	6981620	6982122	16.6027
chr3R	6984725	6985009	5.36557
chr3R	6986736	6987066	8.13403
chr3R	6987428	6988242	5.71343
chr3R	6989215	6990188	8.77363
chr3R	6990975	6991235	3.77857
chr3R	6993285	6993649	2.02743
chr3R	6995180	6995497	7.20568
chr3R	6998908	6999383	2.48267
chr3R	7002100	7002619	3.04336
chr3R	7004463	7004680	3.10752
chr3R	7004862	7005068	15.323
chr3R	7013062	7013531	4.80405
chr3R	7019998	7020233	12.9936
chr3R	7021100	7021312	3.27372
chr3R	7022184	7022418	10.8299
chr3R	7025771	7026203	6.88131
chr3R	7027589	7028069	5.17506
chr3R	7030046	7030504	13.9166
chr3R	7033740	7034185	5.52852
chr3R	7035444	7035903	5.303
chr3R	7036083	7036288	3.62644
chr3R	7038701	7039143	2.46911
chr3R	7046111	7046526	6.30508
chr3R	7437823	7438072	3.34005
chr3R	7932593	7932876	13.3043
chr3R	7938919	7939255	6.7456
chr3R	7940194	7940453	16.6356
chr3R	7942659	7942928	9.44867
chr3R	7943177	7943576	7.65076
chr3R	7945381	7945590	5.57141
chr3R	7955535	7955735	6.99801
chr3R	7958780	7959105	3.02922
chr3R	7959859	7960734	10.8085
chr3R	7962640	7963040	19.7408
chr3R	8002480	8002730	18.9797
chr3R	8104067	8104267	14.6166
chr3R	8132867	8133149	4.3752
chr3R	8157518	8157835	10.9957
chr3R	8174883	8175084	5.36124
chr3R	8177001	8177817	5.17795
chr3R	8178453	8178734	6.06206
chr3R	8182381	8182808	5.4786
chr3R	8183613	8183901	5.94112
chr3R	8184191	8184519	4.85009
chr3R	8184713	8184935	4.5197
chr3R	8185254	8186568	8.09407
chr3R	8187066	8187344	8.4668
chr3R	8189049	8190026	9.66545
chr3R	8190230	8190511	4.46969
chr3R	8191359	8191780	4.02902
chr3R	8194719	8195079	3.78731
chr3R	8195224	8195448	6.9366
chr3R	8195901	8196401	5.4535
chr3R	8197109	8197323	3.42967
chr3R	8198022	8198651	9.56739
chr3R	8200693	8200939	25.6189
chr3R	8202294	8202809	6.60827
chr3R	8204187	8204498	5.24929
chr3R	8206781	8206985	5.63364
chr3R	8209146	8209452	3.58722
chr3R	8210353	8210581	3.30375
chr3R	8211477	8211892	16.2625
chr3R	8229675	8229878	3.87525
chr3R	8256438	8256712	12.642
chr3R	8272899	8273099	3.96803
chr3R	8273322	8273694	4.68433
chr3R	8273993	8274548	9.70095
chr3R	8274789	8275010	5.75714
chr3R	8275657	8275865	3.43108
chr3R	8276328	8277491	3.57861
chr3R	8278187	8279876	4.19868
chr3R	8280599	8281083	7.43829
chr3R	8281294	8281549	4.10458
chr3R	8281740	8282348	5.94384
chr3R	8283002	8283269	5.725
chr3R	8283588	8283791	22.128
chr3R	8289596	8290081	6.68308
chr3R	8292415	8292680	8.73623
chr3R	8293081	8293430	12.7113
chr3R	8297689	8297891	3.04982
chr3R	8320984	8321284	6.85111
chr3R	8324761	8325182	10.5275
chr3R	8329288	8330004	15.3382
chr3R	8330889	8331587	10.0835
chr3R	8332190	8332515	11.2312
chr3R	8332972	8333545	4.49986
chr3R	8333882	8334159	5.30161
chr3R	8335768	8336016	25.2227
chr3R	8346664	8346873	17.7843
chr3R	8481370	8481634	10.9975
chr3R	8682049	8682318	14.9736
chr3R	8694093	8694427	8.36016
chr3R	8709535	8709791	20.5794
chr3R	8902223	8902608	5.03847
chr3R	9137523	9137723	3.75962
chr3R	9157129	9157347	6.28537
chr3R	9846744	9846992	9.58039
chr3R	10027796	10028040	12.7979
chr3R	10034389	10034592	7.26506
chr3R	10099268	10099560	13.6931
chr3R	10172651	10172857	5.90237
chr3R	10195830	10196058	21.219
chr3R	10366768	10367263	5.26743
chr3R	10367579	10367950	16.7976
chr3R	10369659	10369890	3.73059
chr3R	10370022	10370361	4.56918
chr3R	10499004	10499219	17.6736
chr3R	10634246	10634793	20.6321
chr3R	10641897	10642131	7.35144
chr3R	10665158	10665406	5.78046
chr3R	10668208	10668448	3.93924
chr3R	10857272	10857473	5.27588
chr3R	10958556	10958781	8.7737
chr3R	10959322	10959646	5.74991
chr3R	10961226	10961481	5.32385
chr3R	10961724	10961955	8.02001
chr3R	10962706	10962989	4.15608
chr3R	11230833	11231168	15.8918
chr3R	11257320	11257556	3.9058
chr3R	11262895	11263129	3.32153
chr3R	11277529	11277785	17.6418
chr3R	11353899	11354790	4.20634
chr3R	11354963	11355198	12.6345
chr3R	11355346	11357180	5.6829
chr3R	11357978	11358195	5.76617
chr3R	11360058	11360446	4.34972
chr3R	11362299	11362761	12.8334
chr3R	11364914	11365115	5.59134
chr3R	11365753	11366003	3.59413
chr3R	11367699	11368130	18.8841
chr3R	11370281	11370831	2.1272
chr3R	11371183	11371822	5.3588
chr3R	11510930	11511145	6.9416
chr3R	12247416	12247789	2.59325
chr3R	12248344	12248554	4.65811
chr3R	12259942	12260233	6.17768
chr3R	12266168	12266519	5.01592
chr3R	12274006	12274220	8.06165
chr3R	12274492	12274737	6.69172
chr3R	12274988	12275436	5.85656
chr3R	12277226	12277524	2.2512
chr3R	12277681	12277986	3.47959
chr3R	12278478	12278749	6.80083
chr3R	12281555	12282120	3.97252
chr3R	12283271	12283711	6.01301
chr3R	12293931	12294234	14.7612
chr3R	12469564	12469858	8.25938
chr3R	12473223	12473547	15.527
chr3R	12476503	12476703	8.49598
chr3R	12479162	12479401	4.23708
chr3R	12487025	12487360	6.18634
chr3R	12733143	12733497	10.708
chr3R	12735577	12735777	5.66343
chr3R	12864730	12864971	7.91509
chr3R	12965488	12965705	7.0923
chr3R	13057888	13058312	4.95809
chr3R	13059529	13059807	5.28609
chr3R	13060855	13061132	1.5846
chr3R	13061485	13061701	1.89901
chr3R	13062203	13062807	5.37228
chr3R	13065472	13065833	4.54007
chr3R	13067295	13067502	4.3765
chr3R	13067739	13068170	2.75103
chr3R	13068975	13069380	4.71858
chr3R	13069990	13070598	2.60129
chr3R	13071627	13071919	5.42096
chr3R	13072136	13073279	5.86653
chr3R	13073998	13074391	4.8887
chr3R	13074663	13075217	12.9519
chr3R	13076143	13077634	8.47654
chr3R	13132485	13132694	3.03528
chr3R	13260225	13260437	7.41887
chr3R	13404362	13404562	8.46734
chr3R	13650788	13651066	8.20459
chr3R	13800716	13801050	24.5835
chr3R	13804434	13804764	3.3415
chr3R	13805446	13805751	7.08379
chr3R	13808362	13808562	1.94601
chr3R	13810292	13810492	9.63318
chr3R	13811450	13811726	3.64454
chr3R	13813800	13814059	2.75443
chr3R	13864875	13865279	6.52932
chr3R	13872393	13872794	5.17945
chr3R	13873308	13874012	5.76795
chr3R	13874556	13874985	4.36677
chr3R	13875805	13876785	7.75458
chr3R	13877836	13878366	2.6478
chr3R	13879257	13880100	8.09913
chr3R	13881235	13881663	10.7753
chr3R	13883145	13883436	20.5563
chr3R	13883886	13884127	3.91087
chr3R	13888709	13888971	4.11263
chr3R	13890445	13890732	8.56284
chr3R	13891302	13891630	5.29043
chr3R	13893106	13893776	8.37323
chr3R	13894811	13895252	5.8088
chr3R	13895634	13895893	2.08072
chr3R	13897181	13897421	6.71646
chr3R	13899853	13900207	13.0248
chr3R	13900501	13901138	6.6696
chr3R	13901252	13901468	10.7076
chr3R	13902131	13903354	11.0925
chr3R	13903575	13904049	13.9765
chr3R	13906757	13907016	6.18543
chr3R	13907156	13907421	5.90128
chr3R	13910701	13911061	3.84249
chr3R	13916832	13917154	16.5567
chr3R	13921137	13921360	5.56042
chr3R	13922321	13922615	12.4352
chr3R	13923884	13924455	7.73034
chr3R	13929090	13929411	4.86967
chr3R	13929640	13929880	4.83545
chr3R	13931020	13931266	4.80844
chr3R	13932790	13933054	7.72648
chr3R	13966664	13967002	19.9055
chr3R	13967785	13968044	6.02692
chr3R	14694368	14694643	11.7249
chr3R	15057208	15057538	3.4738
chr3R	15138325	15138554	4.89075
chr3R	15420035	15420342	19.3741
chr3R	15577063	15577263	23.7841
chr3R	15591398	15591598	4.98433
chr3R	15657722	15658018	3.59791
chr3R	15737362	15737616	16.5707
chr3R	15986487	15986957	4.38275
chr3R	15990940	15991235	3.78533
chr3R	15992211	15992512	4.31747
chr3R	15995452	15996272	7.85355
chr3R	15999645	15999959	3.83944
chr3R	16008943	16009199	1.5703
chr3R	16009807	16010083	5.77301
chr3R	16011522	16011831	3.29452
chr3R	16014752	16015083	6.17337
chr3R	16016217	16016425	5.73006
chr3R	16016615	16017022	21.7143
chr3R	16018110	16018387	16.7707
chr3R	16019324	16019640	8.67525
chr3R	16020463	16020663	5.87111
chr3R	16023447	16023791	7.15427
chr3R	16029583	16029882	5.90988
chr3R	16032178	16032618	3.90874
chr3R	16035539	16035935	4.25647
chr3R	16036378	16036863	9.66908
chr3R	16038710	16039483	4.46773
chr3R	16039608	16039987	3.36716
chr3R	16386069	16386269	8.68449
chr3R	16386938	16387237	4.46222
chr3R	16388424	16388707	14.1476
chr3R	16390354	16390697	5.43179
chr3R	16392184	16392902	9.58944
chr3R	16393266	16393778	15.5283
chr3R	16400157	16400417	4.78376
chr3R	16400922	16401203	8.98984
chr3R	16402761	16403012	6.80769
chr3R	16403207	16403563	4.71608
chr3R	16404970	16405410	12.268
chr3R	16405512	16405722	6.85059
chr3R	16406696	16406953	3.30869
chr3R	16407353	16407619	6.9171
chr3R	16408106	16408724	4.62638
chr3R	16409067	16409463	2.47254
chr3R	16409591	16409860	2.01749
chr3R	16410583	16411429	10.6162
chr3R	16411817	16412051	2.83315
chr3R	16414103	16414380	12.7005
chr3R	16414775	16414975	10.0595
[truncated: 1,270 more rows]

## Sheet: upregulated regions-re2
upregulated regions-re2
chromosome	start	end	log10 likelihood ratio
chr2L	264	603	5.65921
chr2L	1123	1440	7.27121
chr2L	2433	2922	6.12366
chr2L	3954	4180	3.99486
chr2L	4457	4684	10.6273
chr2L	4934	5469	8.70725
chr2L	5684	5900	4.01461
chr2L	367424	368457	11.2076
chr2L	369523	369853	5.44194
chr2L	370862	371062	4.43699
chr2L	373618	374030	18.2921
chr2L	375079	375384	6.01
chr2L	376548	376838	5.35363
chr2L	485529	485833	3.10302
chr2L	501629	501904	9.43648
chr2L	504524	504798	2.46711
chr2L	513819	514044	4.02137
chr2L	580271	580719	5.17255
chr2L	583047	583687	5.59133
chr2L	584072	584385	4.32178
chr2L	585678	585918	6.13953
chr2L	586462	586736	4.65158
chr2L	589399	589810	16.6567
chr2L	590627	590907	8.97513
chr2L	591214	591868	2.62891
chr2L	592190	593490	3.9343
chr2L	593593	594501	5.88605
chr2L	595055	596052	3.34068
chr2L	596290	598313	5.241
chr2L	598756	599189	4.22518
chr2L	600458	600805	5.31131
chr2L	1694733	1694947	25.4398
chr2L	1948782	1949019	5.47533
chr2L	1949950	1950254	4.13251
chr2L	1950671	1954131	4.29634
chr2L	1954960	1955943	8.21332
chr2L	1956219	1956750	3.50328
chr2L	1957239	1957698	10.003
chr2L	1958166	1959482	7.98483
chr2L	1960660	1961023	14.648
chr2L	1961838	1962444	7.48248
chr2L	1962873	1963301	3.79999
chr2L	1963731	1964180	8.50714
chr2L	1964460	1965594	10.179
chr2L	1965849	1966424	5.47762
chr2L	1966985	1968435	5.16275
chr2L	1968580	1968904	6.70552
chr2L	1969074	1969513	8.27695
chr2L	1969853	1970309	3.60999
chr2L	1970846	1971061	5.34576
chr2L	1971275	1971815	2.01865
chr2L	1971993	1972199	3.50421
chr2L	1973152	1973476	10.4985
chr2L	2158650	2158868	9.56896
chr2L	2204122	2204414	11.2692
chr2L	2429701	2430049	9.46295
chr2L	2444593	2444879	9.16
chr2L	2446243	2446619	17.4884
chr2L	2448905	2449255	5.77282
chr2L	2449488	2449799	16.1433
chr2L	2455631	2455834	4.02847
chr2L	2456476	2456686	23.997
chr2L	2457969	2458458	8.72603
chr2L	3532324	3532723	10.6693
chr2L	3533427	3533672	3.03649
chr2L	3534902	3535420	8.21895
chr2L	3535854	3536080	2.98269
chr2L	3536321	3536576	2.5408
chr2L	3536847	3537097	3.27204
chr2L	3538084	3538325	2.96485
chr2L	3539849	3540269	2.92323
chr2L	3542752	3542980	1.90005
chr2L	3545410	3545688	4.23644
chr2L	3546994	3547777	10.7977
chr2L	3551649	3551849	2.71775
chr2L	3553650	3553906	2.88117
chr2L	3558003	3558248	7.1368
chr2L	3565612	3565836	12.073
chr2L	3566374	3566631	6.78061
chr2L	3566949	3567399	7.23432
chr2L	3571581	3571809	5.88623
chr2L	3573029	3573389	17.5722
chr2L	3576819	3577068	7.05319
chr2L	3577328	3577595	8.56749
chr2L	3578313	3578892	2.60879
chr2L	3579591	3580195	4.23587
chr2L	3582028	3582404	4.89844
chr2L	3589377	3589679	15.0326
chr2L	3591116	3591337	13.0148
chr2L	3591631	3591839	4.47582
chr2L	3593249	3593619	9.86814
chr2L	3595050	3595518	6.55702
chr2L	3596475	3596682	6.51974
chr2L	3597145	3597372	8.67129
chr2L	3598703	3599211	7.14474
chr2L	3599582	3599788	4.67977
chr2L	3600686	3600892	12.6064
chr2L	3602708	3603024	6.84359
chr2L	3603852	3604109	16.3416
chr2L	3604779	3604985	3.28855
chr2L	3605128	3606049	4.06306
chr2L	3606975	3607434	3.48
chr2L	3608584	3609287	7.92637
chr2L	3610271	3610859	5.77796
chr2L	3611166	3611382	3.90441
chr2L	3613049	3613293	2.96773
chr2L	3613500	3613759	5.63814
chr2L	3614043	3614993	4.52566
chr2L	3616584	3616959	9.46056
chr2L	3626775	3626992	17.9758
chr2L	3659775	3660434	10.2419
chr2L	3661990	3662421	7.05224
chr2L	3662914	3663187	7.86166
chr2L	3664215	3664513	11.1651
chr2L	3664738	3665196	5.97249
chr2L	3665434	3665778	6.18889
chr2L	3763677	3763963	13.213
chr2L	3801915	3802116	22.6439
chr2L	3817008	3817288	8.01947
chr2L	3818235	3818441	3.3959
chr2L	3818715	3819066	4.02883
chr2L	3821333	3821616	12.3037
chr2L	3821789	3822095	7.18553
chr2L	3822369	3823077	5.81994
chr2L	3824621	3825013	4.81337
chr2L	3825873	3826907	4.13857
chr2L	3830165	3830606	8.67201
chr2L	3830796	3831136	11.3617
chr2L	3832330	3832590	2.17631
chr2L	3833685	3834429	4.57641
chr2L	3835573	3835944	2.72277
chr2L	3837225	3837939	3.84662
chr2L	3838048	3838651	3.96233
chr2L	3839288	3839732	20.6138
chr2L	3840204	3840629	19.4767
chr2L	3840957	3841413	9.92854
chr2L	3843561	3843832	4.84983
chr2L	3845285	3845745	4.51959
chr2L	3846038	3846319	21.8292
chr2L	3857219	3857446	12.9793
chr2L	3859466	3859916	5.60788
chr2L	3860644	3861117	12.8785
chr2L	4329093	4329353	24.0306
chr2L	4645971	4646176	9.53462
chr2L	4852003	4852239	21.39
chr2L	5067171	5067373	25.0275
chr2L	5196623	5196823	24.9868
chr2L	5359456	5359701	9.86919
chr2L	5360823	5361076	8.24454
chr2L	5374578	5374870	8.21723
chr2L	5380794	5381007	3.28546
chr2L	5381355	5381636	13.5394
chr2L	5384923	5385169	17.2384
chr2L	5391806	5392006	4.36691
chr2L	5392961	5393178	6.09284
chr2L	5395906	5396223	3.4184
chr2L	5397423	5397651	9.14552
chr2L	5400086	5400397	12.452
chr2L	5400668	5401214	3.45586
chr2L	5402153	5402427	4.61275
chr2L	5406065	5406316	11.033
chr2L	5406972	5407424	13.0393
chr2L	5407643	5407884	2.52643
chr2L	5408189	5408607	2.40117
chr2L	5409171	5409488	5.63721
chr2L	5412922	5413340	4.32007
chr2L	5413463	5413665	13.484
chr2L	5413927	5414377	3.91471
chr2L	5415326	5415806	3.57811
chr2L	5420458	5420658	2.12364
chr2L	5424064	5424424	5.56671
chr2L	5425736	5426185	6.47044
chr2L	5427092	5427292	2.2482
chr2L	5429929	5430182	5.42915
chr2L	5445511	5445789	7.91938
chr2L	5451734	5452051	4.9297
chr2L	5452640	5453485	23.3715
chr2L	5455068	5455270	8.54612
chr2L	5457006	5457208	4.75219
chr2L	5457576	5457881	2.16337
chr2L	5459184	5459836	7.11366
chr2L	5462762	5462975	2.5505
chr2L	5463179	5463558	12.6083
chr2L	5463922	5464198	15.4147
chr2L	5465163	5465499	7.86009
chr2L	5465936	5466420	5.14718
chr2L	5472692	5473360	4.66878
chr2L	5476409	5476700	7.64703
chr2L	5923906	5924187	16.5423
chr2L	5925036	5925307	20.8695
chr2L	5963597	5963815	10.2307
chr2L	6016103	6016400	3.1325
chr2L	6018799	6019088	6.90697
chr2L	6176473	6177020	4.32982
chr2L	6219361	6219602	14.654
chr2L	6529301	6529629	9.60778
chr2L	6529985	6530210	6.67895
chr2L	6535627	6536061	7.60406
chr2L	6537853	6538053	26.3118
chr2L	6538165	6538546	12.4981
chr2L	6538942	6539324	20.8444
chr2L	6539636	6540070	6.44115
chr2L	6540623	6541102	4.31626
chr2L	6543689	6544148	14.345
chr2L	6545039	6545481	8.5942
chr2L	6546315	6546652	4.49916
chr2L	6548827	6549617	4.70724
chr2L	6555294	6555495	4.97639
chr2L	6555963	6556231	11.9518
chr2L	6710510	6710710	13.1548
chr2L	6819080	6819392	4.34625
chr2L	6822112	6822418	6.64616
chr2L	6822568	6823098	9.01165
chr2L	6827853	6828144	2.51001
chr2L	6828581	6828873	2.56779
chr2L	6829367	6829659	5.97145
chr2L	6830614	6830916	17.1047
chr2L	6831320	6832032	7.94872
chr2L	6832138	6832594	5.06105
chr2L	6832833	6833233	6.7265
chr2L	6833462	6833688	24.1851
chr2L	6835617	6835953	5.49174
chr2L	6836119	6836403	4.54951
chr2L	6838011	6838230	5.37235
chr2L	6844971	6845203	11.069
chr2L	7273244	7273522	24.7033
chr2L	7275560	7275765	5.59445
chr2L	7288669	7289116	23.3862
chr2L	7290446	7290670	3.86591
chr2L	7296491	7297030	7.61438
chr2L	7299147	7299410	1.81399
chr2L	7300712	7301156	5.72588
chr2L	7301350	7301674	3.79464
chr2L	7302980	7303344	2.17194
chr2L	7303539	7303785	6.88507
chr2L	7304185	7304568	4.18992
chr2L	7304734	7305376	4.52626
chr2L	7305686	7305917	4.2888
chr2L	7307947	7308186	6.19436
chr2L	7309446	7309646	5.57948
chr2L	7358999	7359307	4.07891
chr2L	8817422	8817704	5.71186
chr2L	8818391	8818735	8.30979
chr2L	8823316	8823555	4.56245
chr2L	8824519	8824858	5.33147
chr2L	8826472	8826913	7.06981
chr2L	8827076	8827675	7.61173
chr2L	8828193	8828867	8.85401
chr2L	8832625	8832864	12.0167
chr2L	8845296	8845682	12.6648
chr2L	8853123	8853615	5.56689
chr2L	8855935	8856308	8.40866
chr2L	8860990	8861316	15.9575
chr2L	8862795	8863082	4.50222
chr2L	8875044	8875292	22.0082
chr2L	9577242	9577643	14.3425
chr2L	9578990	9579465	20.0564
chr2L	9579988	9581534	8.02003
chr2L	9582070	9582560	5.82926
chr2L	9582695	9582975	5.0333
chr2L	9583112	9583635	3.62564
chr2L	9583907	9584128	3.35786
chr2L	9584812	9585230	5.57777
chr2L	9585470	9585720	10.0388
chr2L	9588196	9588396	22.7728
chr2L	9589990	9590367	11.0647
chr2L	9595961	9596177	2.30116
chr2L	9597334	9598134	9.41653
chr2L	9600097	9600643	15.2473
chr2L	9602061	9602447	6.09226
chr2L	9603698	9604191	20.8962
chr2L	9604354	9605049	11.0518
chr2L	9605413	9605779	6.70159
chr2L	9606130	9606362	14.6023
chr2L	9606605	9606996	3.66148
chr2L	9607124	9607513	4.32797
chr2L	9608374	9608688	3.68295
chr2L	9609083	9609472	10.4869
chr2L	9609907	9610331	7.57587
chr2L	9611391	9611605	25.6615
chr2L	10595159	10595432	3.56684
chr2L	10782009	10782302	17.0407
chr2L	10843919	10844119	14.171
chr2L	10863002	10863263	7.09681
chr2L	11036001	11036282	8.43017
chr2L	11200420	11200786	7.31168
chr2L	11203455	11203887	12.4906
chr2L	11232615	11232863	14.585
chr2L	11291436	11291713	5.59493
chr2L	11360574	11360859	2.39949
chr2L	11436555	11436933	3.13043
chr2L	11439027	11439270	9.74363
chr2L	11439741	11440086	5.93915
chr2L	11447181	11447419	3.56501
chr2L	11455655	11455859	3.50961
chr2L	11464332	11464659	19.454
chr2L	11465245	11465449	10.0453
chr2L	11867418	11867619	21.0651
chr2L	12004889	12005870	6.41213
chr2L	12006045	12006582	3.51671
chr2L	12008394	12009644	6.00801
chr2L	12078023	12078332	10.5318
chr2L	12078581	12078835	11.8637
chr2L	12079091	12079316	6.38865
chr2L	12080018	12080233	3.26269
chr2L	12081356	12081569	2.91481
chr2L	12083305	12083951	2.32824
chr2L	12084058	12084482	7.22135
chr2L	12084632	12085210	4.42312
chr2L	12086026	12086390	5.12254
chr2L	12087058	12087783	13.729
chr2L	12089240	12089811	3.69802
chr2L	12090507	12090871	6.8256
chr2L	12091960	12092214	14.6533
chr2L	12626739	12626987	21.4164
chr2L	12673189	12673428	19.2
chr2L	12741354	12741598	6.97488
chr2L	12824325	12824528	5.32388
chr2L	12991245	12991544	3.73274
chr2L	13181968	13182176	12.5219
chr2L	14069236	14069490	21.6059
chr2L	14261277	14261477	8.43384
chr2L	14531677	14531956	5.59055
chr2L	15107909	15108205	9.71344
chr2L	15109404	15110430	10.8975
chr2L	15112113	15112599	3.73141
chr2L	15112712	15112955	4.13447
chr2L	15321060	15321293	2.74249
chr2L	15322961	15323177	7.59841
chr2L	15334438	15335272	3.95098
chr2L	15477480	15477701	5.22384
chr2L	15483877	15484089	9.9025
chr2L	15484866	15485111	3.48305
chr2L	15488604	15488807	4.02079
chr2L	15757047	15757347	5.45484
chr2L	16419153	16419527	15.1704
chr2L	16420959	16421591	18.2592
chr2L	16421843	16422128	2.46029
chr2L	16424973	16425484	9.72232
chr2L	16426245	16426590	13.5366
chr2L	16432091	16432389	4.85501
chr2L	16434474	16434674	4.00536
chr2L	16436021	16436262	6.86245
chr2L	16440110	16440348	3.28346
chr2L	16441548	16441941	5.47052
chr2L	16472262	16472578	5.91156
chr2L	16479116	16479320	6.13156
chr2L	16481204	16481503	8.67656
chr2L	16483143	16483519	3.02263
chr2L	16483628	16484725	3.98706
chr2L	17148075	17148449	18.0711
chr2L	17265040	17265348	8.12212
chr2L	17271724	17271927	12.1419
chr2L	17990676	17991075	4.28613
chr2L	18596626	18596934	9.20675
chr2L	18600767	18600967	24.6199
chr2L	18601754	18602166	11.3579
chr2L	18730235	18730547	11.6272
chr2L	18733558	18733984	6.05271
chr2L	18736673	18736974	7.79657
chr2L	18738366	18738679	4.23354
chr2L	18741745	18741945	13.3494
chr2L	18771806	18772091	11.6598
chr2L	18778748	18779151	14.9621
chr2L	18779783	18780475	7.96405
chr2L	18783683	18784234	8.52133
chr2L	18785306	18785516	18.6328
chr2L	18786569	18786859	2.87761
chr2L	18787515	18787780	8.55187
chr2L	18789733	18790150	8.58977
chr2L	18792220	18792598	6.27589
chr2L	18792888	18793522	4.55488
chr2L	18793857	18794173	10.5271
chr2L	18796221	18796434	3.13424
chr2L	18796784	18796985	2.78033
chr2L	18806838	18807055	5.3256
chr2L	18860679	18861036	4.42589
chr2L	18865211	18865575	3.2009
chr2L	18867968	18868730	11.8547
chr2L	18874117	18874525	6.0363
chr2L	18874679	18874879	9.80096
chr2L	18876031	18876354	4.70955
chr2L	18876725	18877081	10.7561
chr2L	18880560	18880836	2.34104
chr2L	18881953	18882442	4.03172
chr2L	18882849	18883108	3.33555
chr2L	18883893	18884452	7.19049
chr2L	18884739	18884944	3.49072
chr2L	18885090	18885320	2.52775
chr2L	18886066	18886536	6.78132
chr2L	18887761	18888056	10.1751
chr2L	18889060	18889308	6.76799
chr2L	18889585	18890145	8.78435
chr2L	18894021	18894321	18.0317
chr2L	18896338	18896604	7.38527
chr2L	18913439	18913706	24.8192
chr2L	18920641	18920853	15.8243
chr2L	18924623	18924837	5.48726
chr2L	18929454	18929795	6.46416
chr2L	18934714	18934916	5.16276
chr2L	19222339	19222539	5.70917
chr2L	19300612	19300854	2.56351
chr2L	19658398	19658603	6.8558
chr2L	19768736	19769013	22.2827
chr2L	19827562	19827798	17.2615
chr2L	20107149	20107349	11.0339
chr2L	20217451	20217800	9.56869
chr2L	20629655	20629893	4.91815
chr2L	20768370	20768822	4.70448
chr2L	20770881	20771967	5.84444
chr2L	20772274	20772644	12.4358
chr2L	20773480	20773831	2.65673
chr2L	20774253	20774620	3.63621
chr2L	20775453	20775978	5.16684
chr2L	20776186	20777135	7.89325
chr2L	20777614	20777930	5.69862
chr2L	20778439	20778797	3.01456
chr2L	20779814	20780025	5.10881
chr2L	20780433	20780749	3.87394
chr2L	20781268	20781607	5.8286
chr2L	20781741	20782527	7.13698
chr2L	20783955	20784193	10.751
chr2L	20784326	20784871	6.24281
chr2L	20785394	20785739	2.41471
chr2L	20896261	20896461	14.6885
chr2L	20953867	20954125	10.7385
chr2L	21430401	21430607	6.22975
chr2L	21451653	21451863	10.1038
chr2L	21466760	21467032	9.08543
chr2L	21534806	21535015	16.1336
chr2L	21774905	21775140	14.902
chr2L	21796996	21797284	9.91991
chr2L	21800464	21800710	2.41609
chr2L	21840459	21840835	4.52605
chr2L	21848870	21849119	6.26609
chr2L	21851149	21851350	21.8402
chr2L	21859561	21860150	4.51651
chr2L	21869976	21870531	7.18301
chr2L	21871713	21871944	5.57751
chr2L	21872281	21872660	17.0965
chr2L	21873648	21873854	5.61914
chr2L	21894423	21895026	5.83356
chr2L	21897414	21897666	14.1912
chr2L	21897899	21898266	7.6462
chr2L	22022012	22022228	8.8698
chr2L	22108254	22108475	2.48036
chr2L	22382026	22382244	6.65069
chr2L	23187864	23188130	3.99619
chr2L	23236045	23236432	8.8591
chr2L	23238034	23238362	12.1079
chr2L	23303104	23303315	3.76852
chr2L	23460191	23460450	4.46543
chr2L	23512802	23513631	31.8023
chr2R	36754	37029	5.32141
chr2R	50653	50939	7.0994
chr2R	93514	93715	4.83683
chr2R	241835	242064	12.4137
chr2R	244531	244939	7.78108
chr2R	245401	245655	15.9584
chr2R	386246	386614	3.32348
chr2R	529709	530382	7.63499
chr2R	733017	733473	18.5221
chr2R	734321	734524	19.5457
chr2R	748746	748980	9.81704
chr2R	870188	870541	21.366
chr2R	1151426	1151730	24.1766
chr2R	1154034	1154383	7.25018
chr2R	1154727	1154928	9.42764
chr2R	1156467	1156719	12.5511
chr2R	1157738	1158057	5.72003
chr2R	1232475	1232676	2.92163
chr2R	1310777	1310983	6.83689
chr2R	1417038	1417361	12.59
chr2R	1565879	1566081	3.41903
chr2R	1777545	1777823	6.63587
chr2R	1816397	1816702	4.3491
chr2R	1825711	1826671	29.7155
chr2R	1851959	1852179	4.7176
chr2R	2358406	2358779	4.73686
chr2R	2534883	2535176	14.0707
chr2R	2544551	2544764	9.15968
chr2R	2710637	2710889	11.4534
chr2R	3232389	3232639	5.63556
chr2R	3310180	3310435	15.9003
chr2R	3390291	3390564	3.13848
chr2R	3482917	3483120	9.82452
chr2R	3528416	3528671	9.27107
chr2R	3775908	3776108	6.23438
chr2R	3801329	3801735	10.965
chr2R	4230080	4230301	13.6313
chr2R	4298981	4299181	16.0029
chr2R	4366057	4366257	25.2609
chr2R	4554851	4555075	13.056
chr2R	4590694	4590902	18.3874
chr2R	4863923	4864472	30.7034
chr2R	4864705	4865164	13.3684
chr2R	4865919	4866575	16.991
chr2R	4867766	4868128	14.3353
chr2R	4868369	4868719	19.0718
chr2R	4870830	4871058	11.4644
chr2R	4922851	4923120	6.59851
chr2R	4991764	4992019	7.20875
chr2R	5105757	5106230	6.79022
chr2R	5393250	5393485	3.19248
chr2R	5627980	5628194	12.0281
chr2R	5747994	5748248	19.7624
chr2R	5897546	5897746	2.68152
chr2R	6175981	6176181	8.18242
chr2R	6311092	6311427	9.69077
chr2R	6316735	6316982	3.87968
chr2R	6379383	6379597	3.27807
chr2R	6380444	6380690	14.0031
chr2R	6384768	6384974	5.53874
chr2R	6392662	6392864	28.786
chr2R	6497362	6497622	6.64211
chr2R	6784347	6784563	5.11998
chr2R	6972305	6972565	27.6108
chr2R	7032514	7032722	3.08375
chr2R	7107142	7107342	6.10215
chr2R	7176390	7176667	3.13708
chr2R	7340601	7340856	5.65619
chr2R	7343041	7343261	5.71774
chr2R	7390509	7390709	23.364
chr2R	7411039	7411471	5.26964
chr2R	7412377	7412712	4.72341
chr2R	7413577	7414319	10.4548
chr2R	7415001	7415267	19.9489
chr2R	7416734	7417189	3.51637
chr2R	7417619	7417874	13.7899
chr2R	7420583	7420789	3.49746
chr2R	7421308	7421822	6.27451
chr2R	7422022	7422230	4.13428
chr2R	7425240	7425702	12.9899
chr2R	7427457	7427844	3.99355
chr2R	7428357	7428570	6.36063
chr2R	7431658	7431974	2.1864
chr2R	7433718	7434552	9.13667
chr2R	7998684	7998903	19.3102
chr2R	8015209	8015434	3.41325
chr2R	8018476	8018727	2.84423
chr2R	8019178	8019649	7.31302
chr2R	8020259	8020901	3.23175
chr2R	8021105	8021395	4.14462
chr2R	8021583	8022450	5.3714
chr2R	8022983	8023710	11.9481
chr2R	8024045	8024245	22.8389
chr2R	8024410	8024851	7.48766
chr2R	8025174	8025653	5.25427
chr2R	8025969	8026567	3.04419
chr2R	8027034	8027664	3.39827
chr2R	8027839	8028587	5.25442
chr2R	8029021	8029387	5.0204
chr2R	8029864	8030257	4.81588
chr2R	8031470	8032900	6.03376
chr2R	8033017	8033372	2.14743
chr2R	8034132	8034787	15.3468
chr2R	8035072	8036116	6.75564
chr2R	8038232	8038596	6.82505
chr2R	8040054	8040755	8.03144
chr2R	8041218	8041493	15.1456
chr2R	8041754	8042330	4.46558
chr2R	8045372	8045744	27.6394
chr2R	8046648	8046908	7.02169
chr2R	8047014	8047403	4.28541
chr2R	8047878	8048321	3.56539
chr2R	8049882	8050497	11.9988
chr2R	8491895	8492137	5.58457
chr2R	8565345	8565569	18.6742
chr2R	9003419	9003672	4.53198
chr2R	9193863	9194180	6.61193
chr2R	9195405	9196169	4.66905
chr2R	9235180	9235488	7.90413
chr2R	9429866	9430219	4.34268
chr2R	9709331	9709571	6.78864
chr2R	9973196	9974761	7.60477
chr2R	9975036	9976048	4.55444
chr2R	9976852	9977903	10.5486
chr2R	9978209	9980479	7.20562
chr2R	9980855	9984954	6.15828
chr2R	9985123	9986958	9.35044
chr2R	9987232	9987872	4.94664
chr2R	10236057	10236471	10.611
chr2R	10237020	10237270	6.546
chr2R	10240463	10240941	3.81817
chr2R	10241822	10242026	3.8488
chr2R	10243346	10243624	5.25662
chr2R	10317157	10317361	24.0747
chr2R	11230781	11231021	6.26679
chr2R	11441140	11441369	9.45349
chr2R	11469427	11469828	5.2603
chr2R	11471377	11471620	4.50766
chr2R	11471917	11472405	12.3136
chr2R	11474128	11474760	8.81676
chr2R	11474875	11475207	10.9858
chr2R	11475896	11477264	3.38027
chr2R	11480168	11480520	10.4608
chr2R	11492648	11492978	15.7409
chr2R	11495183	11495517	2.704
chr2R	11520310	11520669	4.57863
chr2R	11520799	11521325	4.96062
chr2R	11521730	11522196	4.2007
chr2R	11523201	11523415	4.18277
chr2R	11524084	11524423	14.4061
chr2R	11525008	11525237	15.0569
chr2R	11526151	11527641	5.3741
chr2R	11528934	11529353	4.67051
chr2R	11529803	11530161	11.2109
chr2R	11530601	11531085	6.68348
chr2R	11531671	11532838	6.81105
chr2R	11534014	11534665	4.73917
chr2R	11535342	11535646	6.68404
chr2R	11536357	11536830	4.88158
chr2R	11537623	11538198	10.5418
chr2R	11538914	11539146	4.90807
chr2R	11541037	11541764	6.59015
chr2R	11541872	11542132	21.2029
chr2R	11542927	11543202	27.4274
chr2R	11543682	11543999	3.39182
chr2R	11544167	11544741	7.05959
chr2R	11545162	11545765	16.8954
chr2R	11546188	11546484	1.76358
chr2R	11549337	11549541	5.29051
chr2R	11549984	11551054	8.74245
chr2R	11552671	11553506	5.5941
chr2R	11553719	11554028	13.1922
chr2R	11554642	11554855	5.09895
chr2R	11556065	11556449	5.48281
chr2R	11558082	11558422	13.2009
chr2R	11558622	11559181	4.23266
chr2R	11559857	11560380	7.26778
chr2R	11560640	11561260	7.41913
chr2R	11561369	11562427	5.07691
chr2R	11562960	11563233	5.6748
chr2R	11563689	11563925	4.7731
chr2R	11564129	11564365	2.37316
chr2R	11564819	11565059	2.07034
chr2R	11566379	11567095	7.87741
chr2R	11567498	11567731	6.71012
chr2R	11567924	11568261	3.63667
chr2R	11568896	11569492	7.24188
chr2R	11574191	11574391	11.3662
chr2R	11607149	11607353	5.40126
chr2R	11752039	11752243	20.0148
chr2R	11790591	11790818	11.1544
chr2R	11882297	11882549	23.0894
chr2R	12884823	12885230	3.97642
chr2R	12888625	12889296	3.37572
chr2R	12890091	12890294	3.95574
chr2R	12890445	12891048	5.89193
chr2R	12891469	12891777	1.89883
chr2R	12892407	12892997	8.30543
chr2R	12893127	12893532	3.2865
chr2R	12894537	12894951	2.78483
chr2R	12896535	12897192	3.98068
chr2R	12897750	12898343	6.69141
chr2R	12899479	12899985	8.99688
chr2R	12900914	12901493	10.4994
chr2R	12902250	12902460	2.98176
chr2R	12902733	12903341	12.6398
chr2R	12904678	12904878	3.6051
chr2R	12905078	12905649	5.37796
chr2R	12906051	12906609	5.87161
chr2R	12906864	12907286	15.1576
chr2R	12908969	12909303	8.39721
chr2R	12909613	12910057	10.4004
chr2R	12911746	12911952	3.78623
chr2R	12949345	12949553	4.80461
chr2R	12950431	12951386	6.31282
chr2R	12954470	12955204	4.98605
chr2R	12961376	12961680	2.45777
chr2R	12962669	12963045	3.60604
chr2R	12983424	12983829	9.46686
chr2R	12989134	12989604	5.25893
chr2R	12995915	12996319	6.1572
chr2R	12998486	12998767	4.40316
chr2R	12999933	13000241	2.11741
chr2R	13001303	13001799	3.17317
chr2R	13002373	13003345	6.46341
chr2R	13003609	13003917	15.1414
chr2R	13004021	13004321	4.22988
chr2R	13008467	13008687	14.6554
chr2R	13009099	13009613	11.3622
chr2R	13011672	13012009	5.24618
chr2R	13012711	13013062	6.42102
chr2R	13013217	13013607	6.14121
chr2R	13015639	13015839	2.71549
chr2R	13016911	13017383	6.71319
chr2R	13020233	13020617	5.03165
chr2R	13021353	13021852	10.7597
chr2R	13023093	13023976	6.12301
chr2R	13025500	13025759	9.30528
chr2R	13027005	13027254	11.2319
chr2R	13028288	13028495	16.7548
chr2R	13029662	13030139	21.9365
chr2R	13030920	13031321	4.84972
chr2R	13032042	13032527	15.3149
chr2R	13034842	13035227	5.00332
chr2R	13035551	13036116	4.99244
chr2R	13037675	13037974	5.18343
chr2R	13038268	13038474	3.16738
chr2R	13039091	13039768	7.58383
chr2R	13040370	13041265	4.21876
chr2R	13538296	13538556	3.78551
chr2R	13625258	13625544	14.3365
chr2R	13631163	13631386	25.2883
chr2R	14199788	14200010	5.26404
chr2R	14200242	14200767	34.9633
chr2R	14201594	14202063	17.1994
chr2R	14202202	14202740	9.22728
chr2R	14202864	14203115	18.3226
chr2R	14203286	14203952	9.3717
chr2R	14204713	14205386	4.16511
chr2R	14205707	14206556	3.50635
chr2R	14207089	14207907	3.81584
chr2R	14210223	14210687	13.8812
chr2R	14227384	14227598	18.5905
chr2R	14436393	14436705	6.81895
chr2R	14449401	14449624	18.0363
chr2R	14450524	14450785	4.25529
chr2R	14451118	14451326	16.8673
chr2R	14452001	14452536	7.52066
chr2R	14453559	14453927	13.6749
chr2R	14454041	14454601	6.8783
chr2R	14454723	14455464	6.58141
chr2R	14456837	14457181	6.802
chr2R	14457831	14458309	5.56119
chr2R	14459432	14459971	2.93067
chr2R	14460207	14460450	6.09237
chr2R	14461291	14461610	26.2392
chr2R	14462882	14463920	5.77969
chr2R	14464028	14464994	5.86679
chr2R	14466473	14466892	3.16331
chr2R	14477501	14477741	18.3464
chr2R	14478313	14478758	12.6499
chr2R	14479422	14480102	15.0092
chr2R	14658374	14658575	24.2695
chr2R	14775558	14775831	10.3317
chr2R	14789248	14789460	7.09307
chr2R	14791089	14791701	11.5181
chr2R	14792918	14793182	5.21998
chr2R	14794260	14794846	5.04702
chr2R	14795134	14795378	20.0244
chr2R	14795639	14795955	15.8596
chr2R	14796850	14797149	3.46484
chr2R	14797271	14797727	5.16887
chr2R	14798171	14798892	8.41945
chr2R	14800522	14800845	6.19083
chr2R	14802855	14803055	18.1399
chr2R	14805447	14805713	4.69747
chr2R	14807724	14808091	12.1239
chr2R	14810954	14811197	10.6415
chr2R	14812355	14812716	6.90364
chr2R	14905682	14905884	19.6027
chr2R	15107089	15107291	19.2064
chr2R	15257115	15257315	23.3762
chr2R	15330439	15330921	5.2191
chr2R	15333762	15333981	3.52521
chr2R	15825743	15826289	12.0402
chr2R	15826895	15827202	9.0423
chr2R	15827457	15827888	6.22473
chr2R	15828666	15828915	13.5953
chr2R	15829634	15829859	3.47242
chr2R	15830764	15830990	14.3779
chr2R	15831342	15831552	8.21199
chr2R	15832027	15832600	9.02318
chr2R	15833316	15833521	17.6356
chr2R	15833725	15834165	5.16651
chr2R	15834656	15834959	18.3075
chr2R	15836055	15836591	3.21994
chr2R	15837601	15838719	6.41086
chr2R	15838967	15839202	6.21968
chr2R	15840020	15840224	10.1199
chr2R	15840667	15840923	4.02962
chr2R	15844666	15844957	5.68676
chr2R	15845530	15846125	9.68356
chr2R	15846741	15847021	18.5155
chr2R	16476610	16476845	5.42903
chr2R	16648428	16648670	14.9688
chr2R	16803590	16803891	12.7728
chr2R	17755823	17756301	9.36269
chr2R	17778582	17778834	8.85865
chr2R	17820936	17821513	4.10736
chr2R	18138356	18138572	6.40739
chr2R	18252659	18252870	24.3269
chr2R	18255103	18255465	5.07245
chr2R	18382841	18383097	3.55758
chr2R	18519739	18520030	11.6388
chr2R	18655840	18656064	3.4223
chr2R	18681842	18682094	4.97225
chr2R	18956310	18956574	15.0237
chr2R	19746141	19746367	22.1429
chr2R	20030673	20030918	8.95661
chr2R	20424704	20424916	18.7098
chr2R	20780464	20780680	12.2199
chr2R	20820615	20820849	6.3228
chr2R	20890857	20891090	16.3179
chr2R	20894423	20894667	16.6466
chr2R	20896553	20896805	31.7208
chr2R	20898299	20898569	6.9316
chr2R	20898849	20899219	6.98028
chr2R	20900111	20900482	7.66782
chr2R	20901136	20901337	3.58877
chr2R	20901862	20902070	7.8833
chr2R	20902527	20902732	11.095
chr2R	20903006	20903545	3.86499
chr2R	20903820	20904446	6.62883
chr2R	20904795	20905049	20.4693
chr2R	20905164	20905872	12.3123
chr2R	20908122	20909069	17.9402
chr2R	20909665	20910538	3.20956
chr2R	20911016	20911953	8.30521
chr2R	20912623	20913575	12.9474
chr2R	20914105	20914379	9.7116
chr2R	20914557	20914898	2.22279
chr2R	20915160	20915766	7.39986
chr2R	20916968	20917524	6.1437
chr2R	20917744	20917968	9.42297
chr2R	20918223	20919372	6.75781
chr2R	20920461	20920673	1.73038
chr2R	20921214	20921475	4.00891
chr2R	20921727	20922188	13.4278
chr2R	20922448	20922693	6.11094
chr2R	20922924	20923555	14.3785
chr2R	20926279	20926490	13.3452
chr2R	20927098	20927298	32.4852
chr2R	20933594	20933989	17.8808
chr2R	20936077	20936371	4.96037
chr2R	20945828	20946154	13.1269
chr2R	20946663	20947304	15.3026
chr2R	20948724	20948981	5.7812
chr2R	20950618	20950925	17.0286
chr2R	20951588	20951870	23.7147
chr2R	20952022	20952454	6.9965
chr2R	20953748	20954020	2.17904
chr2R	20955019	20955647	9.75991
chr2R	20955925	20956406	4.42633
chr2R	20956680	20957493	5.61492
chr2R	20958297	20958931	6.46501
chr2R	20959061	20959580	6.97575
chr2R	20959802	20960106	8.28892
chr2R	20960341	20960721	9.66938
chr2R	20962028	20962824	3.20531
chr2R	20963280	20963890	3.44189
chr2R	20965230	20966214	6.61181
chr2R	20969067	20969395	6.02328
chr2R	20975624	20975824	4.37473
chr2R	20985105	20985305	12.5093
chr2R	20989026	20989245	6.16193
chr2R	20990421	20990621	4.12475
chr2R	21374075	21374277	10.0583
chr2R	21506310	21506556	16.2124
chr2R	22237326	22237812	4.84932
chr2R	22239708	22240363	2.87618
chr2R	22240490	22240919	2.35552
chr2R	22244938	22245379	5.83516
chr2R	22248907	22249129	6.39984
chr2R	22263089	22263289	19.2519
chr2R	22264321	22264564	5.01065
chr2R	22267998	22268238	7.27479
chr2R	22283139	22283430	4.23616
chr2R	22300125	22300365	19.7652
chr2R	22733021	22733303	6.18369
chr2R	22859051	22859277	6.4323
chr2R	22859660	22860061	10.4585
chr2R	22860662	22860895	33.1576
chr2R	22861662	22862125	8.80799
chr2R	22862894	22863388	9.2585
chr2R	22865512	22865840	4.99116
chr2R	22866278	22866566	6.48766
chr2R	22868432	22868810	22.097
chr2R	22869472	22870246	5.30569
chr2R	23046435	23048334	8.03595
chr2R	23048838	23049186	4.00663
chr2R	23049845	23050088	5.37942
chr2R	23050879	23051299	17.6594
chr2R	23051989	23052317	9.9578
chr2R	23053287	23053489	2.78248
chr2R	23054975	23055315	3.97691
chr2R	23096467	23096708	26.3088
chr2R	23199863	23200075	13.0815
chr2R	23528713	23528920	27.9886
chr2R	23619026	23619226	23.5655
chr2R	23621892	23622223	4.19237
chr2R	23622390	23622949	2.87772
chr2R	23623162	23623882	4.90462
chr2R	23624399	23624787	14.1735
chr2R	23624987	23625460	4.23021
chr2R	23627860	23628070	4.42957
chr2R	23628787	23629839	4.93884
chr2R	23630670	23631108	18.272
chr2R	23631371	23631943	21.3358
chr2R	23635754	23636222	7.54549
chr2R	23636553	23636845	9.87875
chr2R	23636981	23637503	27.9437
chr2R	23637893	23638105	5.48159
chr2R	23641128	23641331	4.97955
chr2R	23641561	23642111	6.2783
chr2R	23642247	23642507	2.83334
chr2R	23642914	23643304	6.14263
chr2R	23643439	23643656	4.70572
chr2R	23956380	23956654	12.4372
chr2R	24107958	24108330	11.6784
chr2R	24125685	24125903	11.4029
chr2R	24368851	24369051	16.5739
chr2R	24371455	24371769	8.12204
chr2R	24373264	24373511	4.0297
chr2R	24614385	24614590	25.2255
chr2R	24801101	24801326	17.5863
chr2R	24803055	24803409	7.12601
chr2R	24804376	24805385	4.33005
chr2R	24805882	24806389	4.54262
chr2R	24806992	24807271	3.33252
chr2R	24807426	24807737	2.44081
chr2R	24807963	24808181	10.9211
chr2R	24808313	24808973	4.94999
chr2R	24809474	24809742	3.89672
chr2R	24810310	24810726	12.0296
chr2R	24811168	24812604	7.27143
chr2R	24813028	24813347	10.0447
chr2R	24813549	24814238	13.0687
chr2R	24815245	24815640	4.17487
chr2R	24817528	24817836	8.3602
chr2R	24818635	24819373	7.23979
chr2R	24819753	24820056	6.70309
chr2R	24820954	24821246	16.0202
chr2R	24823043	24823401	22.3641
chr2R	24824282	24824490	5.92462
chr2R	24827887	24828238	4.77307
chr2R	24830956	24831169	21.0689
chr2R	24833365	24833601	5.0588
chr2R	24836153	24836710	16.2213
chr2R	24841185	24841387	2.54747
chr2R	24843802	24844340	4.81268
chr2R	24844554	24844922	5.34741
chr2R	24845733	24846141	22.2009
chr2R	24846355	24846727	10.4231
chr2R	24847425	24848241	11.2371
chr2R	24848936	24849796	5.71756
chr2R	24850365	24851610	8.82151
chr2R	24853062	24853441	12.8702
chr2R	24853826	24854573	5.46387
chr2R	24856017	24856324	6.25969
chr2R	24856751	24857188	8.25675
chr2R	24923536	24923792	16.0215
chr2R	25041352	25041774	4.91613
chr2R	25042143	25042698	4.96451
chr2R	25043269	25043596	9.09984
chr2R	25046119	25046568	10.3596
chr2R	25048489	25048930	19.7274
chr2R	25049204	25049408	4.88592
chr2R	25050410	25050655	12.7517
chr2R	25051840	25052113	2.15556
chr2R	25052434	25052795	20.6962
chr2R	25053214	25053614	7.05476
chr2R	25054437	25054865	20.5309
chr2R	25055295	25056112	11.4088
chr2R	25056486	25057385	2.5326
chr2R	25057952	25058152	3.74822
chr2R	25058781	25059046	5.49177
chr2R	25059393	25059862	5.29564
chr2R	25060374	25061299	6.38328
chr2R	25062139	25062796	9.44482
chr2R	25063304	25063961	6.92315
chr2R	25065456	25065851	9.1039
chr2R	25066111	25066388	4.80698
chr2R	25066881	25067299	11.7671
chr2R	25067997	25068986	4.09353
chr2R	25069265	25069755	6.23501
chr2R	25071176	25071541	6.73021
chr2R	25087297	25087500	5.15717
chr2R	25094184	25094608	15.6981
chr2R	25122340	25122542	14.4063
chr2R	25265994	25266361	5.05698
chr2R	25277978	25278396	6.44499
chr2R	25283168	25283529	9.72374
chr2R	25284032	25284278	6.88807
chr2R	25284437	25284974	7.22927
chr3L	204	474	25.487
chr3L	1943	2169	5.4147
chr3L	2984	3409	10.2537
chr3L	7426	7713	5.22912
chr3L	9086	9310	4.80491
chr3L	11263	11600	6.32815
chr3L	14260	14475	7.46414
chr3L	16414	16659	3.75254
chr3L	19546	19870	5.2619
chr3L	32055	32284	30.2761
chr3L	368198	368449	9.61746
chr3L	370665	371094	7.1883
chr3L	371872	372757	6.39898
chr3L	373369	373794	2.42346
chr3L	373994	374320	10.2731
chr3L	375010	375538	7.80616
chr3L	376049	377202	7.40756
chr3L	378985	379650	7.29499
chr3L	379874	380250	13.9878
chr3L	381223	381517	3.01541
chr3L	382301	382678	7.54025
chr3L	383243	383494	5.75697
chr3L	385535	385967	3.41784
chr3L	389629	389829	3.83041
chr3L	393765	393973	7.26906
chr3L	399656	399933	3.63548
chr3L	401052	401324	5.30018
chr3L	417976	418224	16.7617
chr3L	425638	425931	5.15796
chr3L	430133	430426	4.81503
chr3L	432179	432438	22.5721
chr3L	433309	433769	6.84694
chr3L	903198	903483	2.98599
chr3L	996766	996984	4.99823
chr3L	1104657	1104981	21.5473
chr3L	1178668	1179000	7.10746
chr3L	1353331	1353645	8.21665
chr3L	1358702	1359396	5.31977
chr3L	1361236	1361436	6.28809
chr3L	1361715	1362298	16.0556
chr3L	1362723	1362923	11.7111
chr3L	1366151	1366613	5.82235
chr3L	1413991	1414292	18.6877
chr3L	1446348	1446549	20.5219
chr3L	1449113	1449366	4.66675
chr3L	1451294	1451522	3.37638
chr3L	1452644	1452878	14.42
chr3L	1456306	1456580	5.09119
chr3L	1461695	1462261	13.1079
chr3L	1470011	1470367	5.35392
chr3L	1474747	1475064	12.8782
chr3L	1476180	1476614	5.74541
chr3L	1479878	1480139	22.2276
chr3L	1484497	1484709	6.10949
chr3L	1635530	1635760	11.725
chr3L	1915451	1915798	12.4982
chr3L	1917917	1919074	5.61357
chr3L	1919780	1920236	8.57538
chr3L	1921430	1922276	3.93968
chr3L	1924132	1924830	8.24274
chr3L	2095048	2095271	7.00292
chr3L	2119582	2119782	11.5343
chr3L	2611820	2612037	10.554
chr3L	2623376	2623645	20.9781
chr3L	2630403	2630603	4.7295
chr3L	2755121	2755410	4.37359
chr3L	3383991	3384191	6.10592
chr3L	3621309	3621603	3.42019
chr3L	3626695	3626984	6.75765
chr3L	3628632	3628835	13.3767
chr3L	3630881	3631128	5.78609
chr3L	3632884	3633201	18.8225
chr3L	3845115	3845555	11.3975
chr3L	3850284	3850588	5.11124
chr3L	3852567	3852841	28.4134
chr3L	3859104	3859375	12.3773
chr3L	3860867	3861067	24.9206
chr3L	3864571	3864868	12.9723
chr3L	3868461	3868745	8.43186
chr3L	3871611	3871891	3.88482
chr3L	3873736	3873982	26.9484
chr3L	3876586	3876913	12.3109
chr3L	3877643	3877861	10.3328
chr3L	3879304	3879775	14.1727
chr3L	3882711	3882923	4.83388
chr3L	3885929	3886348	5.42266
chr3L	3888194	3888421	15.7227
chr3L	3900385	3900585	8.50488
chr3L	4144468	4144671	6.45051
chr3L	4151727	4152258	6.56483
chr3L	4153702	4154227	17.1555
chr3L	4155130	4155743	5.99591
chr3L	4157303	4157660	4.21864
chr3L	4157893	4158098	3.0181
chr3L	4158229	4158450	3.8206
chr3L	4158789	4159021	2.8172
chr3L	4159628	4159945	10.417
chr3L	4160208	4160700	11.9509
chr3L	4161919	4162278	5.24516
chr3L	4162891	4164320	9.69921
chr3L	4274819	4275027	5.41143
chr3L	4294851	4295070	11.5401
chr3L	4647328	4647532	4.53406
chr3L	4805178	4805378	19.9654
chr3L	4972414	4972774	15.0922
chr3L	4993440	4993640	13.8841
chr3L	5121302	5121559	6.08005
chr3L	5462558	5462761	6.11197
chr3L	5847037	5847411	9.54705
chr3L	5851057	5851479	9.14359
chr3L	5854471	5854810	3.52539
chr3L	5880846	5881138	4.12058
chr3L	5883080	5883456	8.98442
chr3L	6097128	6097354	24.2952
chr3L	6770953	6771249	2.99934
chr3L	6785891	6786420	7.35619
chr3L	6786654	6786893	4.66354
chr3L	6790545	6790812	3.3048
chr3L	6790995	6791756	10.6647
chr3L	6792130	6792330	5.57177
chr3L	6792571	6792993	3.53565
chr3L	6801372	6801684	3.39714
chr3L	6817534	6817824	4.71572
chr3L	6840620	6840847	20.3152
chr3L	6901097	6901467	7.22198
chr3L	6902972	6903287	6.94775
chr3L	6905466	6905733	6.29688
chr3L	6986680	6986987	7.89656
chr3L	6991429	6991645	2.75462
chr3L	7304302	7304603	6.72458
chr3L	7331345	7331574	5.4557
chr3L	7361845	7362398	11.5649
chr3L	7930331	7930531	28.172
chr3L	7947534	7947736	5.18834
chr3L	7948320	7949355	3.52397
chr3L	7950536	7951053	12.9904
chr3L	7962566	7962859	8.71468
chr3L	8478665	8478869	22.1216
chr3L	8678352	8678555	4.46586
chr3L	9001334	9001752	4.72805
chr3L	9003539	9004046	9.97246
chr3L	9005302	9006001	2.83103
chr3L	9006282	9006993	6.09077
chr3L	9007150	9007508	4.15869
chr3L	9007708	9007946	1.91102
chr3L	9008083	9008383	1.61379
chr3L	9009097	9009823	9.03358
chr3L	9010677	9010933	4.16311
chr3L	9011361	9011770	7.99469
chr3L	9012137	9012642	14.7424
chr3L	9012998	9013424	3.55154
chr3L	9014481	9014958	5.11819
chr3L	9015228	9015628	6.17029
chr3L	9015952	9016209	1.63406
chr3L	9016906	9017786	11.1723
chr3L	9018576	9019287	5.28021
chr3L	9020464	9020951	3.74973
chr3L	9021528	9021865	7.25337
chr3L	9024791	9025330	12.1892
chr3L	9026863	9027376	5.68269
chr3L	9029390	9029592	23.0734
chr3L	9031115	9031639	3.02575
chr3L	9033237	9033600	2.21805
chr3L	9033967	9034284	4.18537
chr3L	9034852	9035337	3.36467
chr3L	9035467	9035942	4.00775
chr3L	9036966	9037167	4.00533
chr3L	9037722	9038271	5.51141
chr3L	9039235	9039913	7.17058
chr3L	9043421	9043705	6.06409
chr3L	9044504	9044776	2.10387
chr3L	9681992	9682329	11.142
chr3L	10032771	10033016	7.67017
chr3L	10226925	10227345	4.51225
chr3L	10238869	10239117	19.0818
chr3L	10244292	10244536	5.7069
chr3L	10248344	10248767	6.47709
chr3L	10271150	10271399	15.0925
chr3L	10288249	10288552	4.70706
chr3L	10290143	10290549	4.59002
chr3L	10291270	10291851	3.12854
chr3L	10294750	10294979	3.89599
chr3L	10295419	10295637	5.67926
chr3L	10912286	10912486	4.08021
chr3L	10982765	10982998	3.20839
chr3L	10994847	10995065	27.9543
chr3L	11009385	11009667	6.87321
chr3L	11012069	11012347	15.9319
chr3L	11013423	11013670	1.96361
chr3L	11014911	11015270	6.4192
chr3L	11015583	11015784	15.3543
chr3L	11017147	11017509	3.81773
chr3L	11100112	11100414	12.4592
chr3L	11363514	11363752	22.9101
chr3L	11458723	11458990	12.9814
chr3L	11464406	11464632	19.8057
chr3L	11542536	11542771	5.51521
chr3L	11922711	11922962	7.81778
chr3L	11923469	11923732	4.24462
chr3L	11925334	11925687	4.57643
chr3L	11925917	11926238	3.10804
chr3L	11930103	11930435	7.25945
chr3L	11933304	11933598	6.28694
chr3L	11933980	11934550	12.727
chr3L	11971358	11971838	9.58031
chr3L	12301625	12301826	14.1293
chr3L	12302341	12302582	19.8024
chr3L	12325390	12325700	17.2607
chr3L	12327200	12327798	5.41991
chr3L	12328386	12328592	12.9741
chr3L	12329607	12330582	3.90596
chr3L	12334276	12334476	7.65905
chr3L	12429682	12430001	10.9078
chr3L	12431964	12432437	2.67563
chr3L	12433597	12433958	4.78604
chr3L	12434069	12434284	6.82756
chr3L	12435377	12435963	4.88927
chr3L	12436605	12436969	4.33729
chr3L	12438281	12438651	4.63068
chr3L	12439257	12439925	12.3995
chr3L	12441194	12441470	5.51098
chr3L	12449306	12449552	7.81816
chr3L	12453226	12453436	13.412
chr3L	12455114	12455415	4.56796
chr3L	12458103	12458303	26.6132
chr3L	12459550	12459844	5.2624
chr3L	12465774	12466344	10.3073
chr3L	12467365	12467618	25.5282
chr3L	12469026	12469884	5.93257
chr3L	12574630	12574864	2.91832
chr3L	12577623	12577880	19.8388
chr3L	12578414	12579325	7.99685
chr3L	12579860	12580229	21.2443
chr3L	12584198	12584708	11.8176
chr3L	12591864	12592161	6.93795
chr3L	12594791	12595593	11.5851
chr3L	12604565	12604894	11.8487
chr3L	12607363	12607563	6.60136
chr3L	12610072	12610726	11.0593
chr3L	12612522	12612954	6.90403
chr3L	12617139	12617339	4.20847
chr3L	12623960	12624199	3.46622
chr3L	12642341	12642563	20.9081
chr3L	12651471	12651781	2.42271
chr3L	12652189	12652489	5.14334
chr3L	12654728	12655198	12.4168
chr3L	12657856	12658256	5.28584
chr3L	12659052	12659293	17.2343
chr3L	12659573	12660012	8.45841
chr3L	12661341	12661549	8.70509
chr3L	12662735	12662964	21.7801
chr3L	12663590	12663907	16.3068
chr3L	12668696	12668937	22.4233
chr3L	12670242	12670459	13.0871
chr3L	12678270	12678868	3.48056
chr3L	12680191	12680439	13.51
chr3L	12681501	12681716	5.24209
chr3L	12683465	12683665	2.17771
chr3L	12685646	12685849	8.00202
chr3L	12686353	12686772	5.55724
chr3L	12687083	12687486	5.33405
chr3L	12687942	12688431	5.56493
chr3L	12688636	12689321	3.77992
chr3L	12689780	12690238	15.6719
chr3L	12690933	12691295	5.29866
chr3L	12692200	12692663	6.49567
chr3L	12695826	12696119	4.79133
chr3L	12696505	12697094	7.05024
chr3L	12698992	12699228	2.27968
chr3L	12702897	12703144	6.86272
chr3L	12708175	12708517	8.94466
chr3L	12728531	12728748	23.0082
chr3L	12922786	12923250	6.06795
chr3L	12923838	12924204	6.7496
chr3L	13396660	13397130	10.2613
chr3L	13399944	13400409	4.88614
chr3L	13400685	13400885	2.16702
chr3L	13402604	13402969	3.61966
chr3L	13404579	13405096	4.81772
chr3L	13405335	13406441	4.09183
chr3L	13407310	13407651	4.10774
chr3L	13481287	13481627	18.6324
chr3L	13578447	13578703	19.6101
chr3L	13579119	13579331	12.5684
chr3L	13579619	13579901	4.98297
chr3L	13649653	13649899	11.0757
chr3L	14044398	14044598	18.1752
chr3L	14120236	14120465	12.0028
chr3L	14121504	14121790	5.74256
chr3L	14125548	14126160	11.3265
chr3L	14131206	14131637	13.6053
chr3L	14133484	14133951	18.3427
chr3L	14135445	14135813	3.51055
chr3L	14137240	14137487	3.4121
chr3L	14138157	14138361	4.58556
chr3L	14139473	14139777	3.7442
chr3L	14154045	14154422	9.40269
chr3L	14156302	14156524	5.03249
chr3L	14160982	14161319	6.07759
chr3L	14170139	14170361	6.06066
chr3L	14172104	14172458	6.46794
chr3L	14176019	14177282	6.1516
chr3L	14180774	14181019	7.11756
chr3L	14277719	14278034	4.67796
chr3L	14567842	14568042	7.44406
chr3L	14572280	14572496	5.68308
chr3L	14573357	14573722	28.2599
chr3L	14576653	14576874	11.7642
chr3L	14577395	14577823	3.6243
chr3L	14580069	14581062	7.73424
chr3L	14581407	14581643	7.6985
chr3L	14581927	14582232	7.65197
chr3L	14584417	14584824	7.96048
chr3L	14585347	14585625	21.2846
chr3L	14588011	14588211	8.27047
chr3L	14597773	14598096	5.24296
chr3L	14598206	14598969	6.50628
chr3L	14599888	14600144	7.55966
chr3L	14751253	14751453	8.20742
chr3L	15019196	15019624	3.82518
chr3L	15027105	15027416	4.16546
chr3L	15030095	15030403	4.41575
chr3L	15031580	15031792	7.93239
chr3L	15041725	15042015	5.99253
chr3L	15042894	15043783	4.30415
chr3L	15045634	15045837	5.30123
chr3L	15921542	15921833	24.6477
chr3L	16014166	16014385	6.96909
chr3L	16368757	16368957	5.2041
chr3L	16383427	16383627	5.03875
chr3L	16418109	16418324	12.2859
chr3L	16761935	16762211	14.2933
chr3L	17308155	17308515	8.38196
chr3L	17918981	17919284	5.94731
chr3L	18084169	18084530	5.44868
chr3L	18108442	18108642	8.24751
chr3L	18196430	18196689	22.5694
chr3L	18292645	18292872	4.40337
chr3L	18362513	18362815	5.28457
chr3L	18366520	18366743	9.47538
chr3L	18368436	18368656	4.28116
chr3L	18374450	18374795	13.6973
chr3L	18852155	18852644	7.92284
chr3L	18857552	18857966	6.06676
chr3L	19653372	19653870	7.38662
chr3L	19656869	19657382	4.34903
chr3L	19658421	19658685	5.74547
chr3L	19659879	19660188	5.23963
chr3L	19662327	19662545	18.2573
chr3L	19662861	19663262	10.0428
chr3L	19664659	19665937	3.35466
chr3L	19667047	19667440	2.1381
chr3L	19668411	19669321	13.1232
chr3L	19670605	19671130	24.7758
chr3L	19672633	19672872	9.78089
chr3L	19673591	19673855	5.30836
chr3L	19674165	19674455	4.83002
chr3L	19678974	19679831	9.09083
chr3L	19681034	19682076	10.317
chr3L	20496351	20496602	25.2138
chr3L	20625763	20626218	12.5131
chr3L	20627138	20627393	4.07684
chr3L	20637759	20637991	5.46558
chr3L	20665555	20665891	5.7562
chr3L	20689023	20689228	10.4422
chr3L	20691270	20691746	18.8799
chr3L	20692860	20693320	4.81128
chr3L	20693434	20693776	3.81977
chr3L	20697169	20697454	9.94459
chr3L	20698099	20698533	16.624
chr3L	20699388	20700089	4.0027
chr3L	20793858	20794243	6.63415
chr3L	20794462	20794751	6.70725
chr3L	20795944	20796144	3.66019
chr3L	20797332	20798032	12.8671
chr3L	21455528	21455745	4.1653
chr3L	21456453	21456752	3.2244
chr3L	21457643	21457969	3.93483
chr3L	21458434	21458991	5.08822
chr3L	21459395	21459739	6.01092
chr3L	21460409	21460922	3.62695
chr3L	21462380	21462846	7.11825
chr3L	21463536	21463986	13.7087
chr3L	21465011	21465227	6.55492
chr3L	21466722	21467011	5.41913
chr3L	21468724	21469348	22.7828
chr3L	21469620	21469993	4.76422
chr3L	21470445	21470805	3.78076
chr3L	21471343	21471679	5.17154
chr3L	21472010	21472553	9.05383
chr3L	21472850	21476003	5.85129
chr3L	21476945	21477379	4.48785
chr3L	21479340	21479561	11.0714
chr3L	21479924	21480472	5.27787
chr3L	21480703	21481182	5.09851
chr3L	21481654	21482632	6.19053
chr3L	21563678	21563939	16.412
chr3L	21581598	21581876	2.37522
chr3L	21582484	21583012	4.68266
chr3L	21583234	21583657	4.40783
chr3L	21583770	21584033	3.6466
chr3L	21585590	21586733	7.30536
chr3L	21589439	21589804	6.34033
chr3L	21590025	21590238	13.9522
chr3L	21591281	21591511	5.32102
chr3L	21591720	21591957	20.1133
chr3L	21592215	21592574	6.68822
chr3L	21594695	21595413	7.03602
chr3L	21595827	21596068	2.06337
chr3L	21596194	21596513	3.24429
chr3L	21596861	21597119	4.82186
chr3L	21598716	21599148	6.5533
chr3L	21599312	21599635	25.5638
chr3L	21601328	21601528	6.13365
chr3L	21602711	21603187	7.14023
chr3L	21603410	21603622	26.0938
chr3L	21758495	21758827	8.37914
chr3L	21777565	21777765	3.58202
chr3L	21798019	21798266	2.42179
chr3L	21801533	21801757	8.64368
chr3L	21801990	21802250	7.7596
chr3L	21803621	21804306	5.23997
chr3L	21804632	21805071	4.62874
chr3L	21805710	21806318	12.0388
chr3L	21806785	21807671	8.19622
chr3L	21810031	21810265	3.10662
chr3L	21811579	21812042	5.23094
chr3L	21813346	21813775	3.80299
chr3L	21816221	21817261	6.49886
chr3L	21985733	21985935	4.73455
chr3L	22105181	22105382	4.79458
chr3L	22251752	22251962	11.2671
chr3L	22725040	22725326	2.6751
chr3L	22941059	22941358	2.47306
chr3L	23113683	23114180	19.4012
chr3L	23114711	23115109	12.8828
chr3L	23115661	23116228	23.9271
chr3L	23116427	23116970	31.7038
chr3L	23117090	23117516	17.2051
chr3L	23199867	23200155	7.26186
chr3L	23312132	23312393	6.32785
chr3L	23378977	23379199	3.41772
chr3L	23413892	23414160	22.9078
chr3L	23460319	23460519	4.41479
chr3L	23711128	23711411	16.5963
chr3L	24186877	24187117	5.4517
chr3L	24380139	24380532	7.77708
chr3L	24441843	24442043	13.6738
chr3L	24865783	24866005	5.6431
chr3L	25040773	25040979	8.28144
chr3L	25045553	25045985	6.31453
chr3L	25130044	25130273	15.5421
chr3L	25131300	25131722	26.869
chr3L	25132315	25133070	15.1865
chr3L	25133812	25134438	22.8751
chr3L	25157191	25157612	7.33612
chr3L	25291056	25291277	12.2409
chr3L	25370647	25370871	5.50403
chr3L	25433052	25433299	5.19657
chr3L	25963059	25963359	13.4824
chr3L	26067169	26067598	13.9544
chr3L	26070275	26070477	5.9753
chr3L	26094370	26094570	4.25041
chr3L	26109258	26109599	4.93259
chr3L	26594899	26595150	13.7191
chr3L	26596456	26596744	10.2148
chr3L	26598156	26598522	6.86879
chr3L	26768686	26768924	17.939
chr3L	27042908	27043153	14.4286
chr3L	27621482	27621835	6.23055
chr3L	27622056	27622559	13.3011
chr3L	27623126	27623586	6.32217
chr3L	27721822	27722028	19.0859
chr3L	27996433	27996674	5.84639
chr3R	2272	2488	2.80874
chr3R	6661	6864	7.99517
chr3R	14357	14560	3.30755
chr3R	27431	27644	10.8657
chr3R	123856	124107	24.0063
chr3R	137261	137558	16.0838
chr3R	140300	140501	9.20846
chr3R	175579	175807	7.41861
chr3R	262062	262476	4.71229
chr3R	263428	263816	3.78745
chr3R	264069	264393	5.12239
chr3R	316143	316532	10.7482
chr3R	321964	322171	13.389
chr3R	391018	391218	15.7457
chr3R	505040	505265	16.3416
chr3R	505511	505791	6.76912
chr3R	788021	788308	13.4344
chr3R	1302628	1302836	4.37404
chr3R	1364717	1364941	7.20604
chr3R	1607230	1607466	3.43791
chr3R	1653665	1653913	6.3335
chr3R	1749792	1750165	8.23213
chr3R	1751488	1751689	3.76915
chr3R	1752349	1752930	12.7475
chr3R	2091335	2091569	34.6065
chr3R	2448666	2448895	11.3057
chr3R	2786250	2786558	20.1426
chr3R	3055028	3055298	5.41378
chr3R	3143167	3143502	4.62132
chr3R	3143841	3144116	23.4589
chr3R	3161863	3162070	27.2686
chr3R	3169946	3170349	21.3577
chr3R	3447873	3448130	5.47483
chr3R	3564413	3564636	31.651
chr3R	3906168	3906415	8.69148
chr3R	3911112	3911315	9.9461
chr3R	4344314	4344876	5.14913
chr3R	4345327	4346500	5.33696
chr3R	4346954	4347792	8.93525
chr3R	4348387	4348588	4.84324
chr3R	4350128	4350607	3.22214
chr3R	4352744	4352951	4.02203
chr3R	4359996	4360341	23.8075
chr3R	4485877	4486142	12.5542
chr3R	4778828	4779049	9.23893
chr3R	4823242	4823573	6.18936
chr3R	4829235	4829480	4.09582
chr3R	4830068	4830285	12.8469
chr3R	4832575	4832829	6.08685
chr3R	4833967	4834313	15.0705
chr3R	4836871	4837287	10.1913
chr3R	4841614	4841949	8.58349
chr3R	4843120	4843513	12.8193
chr3R	4845002	4845327	17.5806
chr3R	4845508	4845710	4.44098
chr3R	4846129	4846568	21.3191
chr3R	4846930	4847786	7.02135
chr3R	4847940	4848460	3.90043
chr3R	4848773	4849106	7.93654
chr3R	4849547	4851446	10.3293
chr3R	4851768	4852044	3.01286
chr3R	4853064	4853958	6.63865
chr3R	4854327	4854565	11.283
chr3R	4857058	4857539	8.03337
chr3R	4859898	4860195	5.78317
chr3R	4865908	4866298	6.96896
chr3R	4866947	4867312	11.1676
chr3R	4868420	4868622	12.6568
chr3R	4871126	4871340	4.27901
chr3R	4874144	4874385	14.3497
chr3R	4883673	4883919	9.83926
chr3R	4886397	4886911	25.923
chr3R	5148569	5148784	4.39971
chr3R	5340600	5340854	12.8439
chr3R	5342859	5343210	6.49044
chr3R	5521386	5521657	14.5949
chr3R	5637784	5638020	5.65845
chr3R	5711932	5712132	25.1977
chr3R	5714067	5714275	2.40951
chr3R	5716070	5716292	7.62691
chr3R	5718144	5718634	8.14158
chr3R	5721545	5721792	10.8438
chr3R	5722220	5722436	3.31232
chr3R	5740896	5741096	27.5258
chr3R	6417366	6417607	3.56695
chr3R	6418475	6418834	6.43375
chr3R	6491275	6491475	8.33101
chr3R	6513463	6513693	19.9923
chr3R	6665214	6665549	4.20526
chr3R	6666144	6666558	9.99189
chr3R	6671774	6672128	4.90528
chr3R	6674400	6674667	4.52496
chr3R	6674804	6675211	5.95612
chr3R	6675848	6676163	5.74983
chr3R	6677056	6678399	7.26617
chr3R	6679375	6680406	5.65135
chr3R	6681397	6681809	4.21466
chr3R	6684628	6685057	8.47208
chr3R	6692605	6692813	5.0872
chr3R	6720375	6720593	13.136
chr3R	6727883	6728351	3.21078
chr3R	6729985	6730227	26.625
chr3R	6736116	6736317	8.8308
chr3R	6737236	6737436	6.68335
chr3R	6739584	6740120	7.75223
chr3R	6742726	6742934	3.35317
chr3R	6745827	6746130	6.58287
chr3R	6746429	6746728	3.4099
chr3R	6750998	6751348	8.47297
chr3R	6756522	6756925	6.08752
chr3R	6781429	6782024	7.31467
chr3R	6783596	6783975	5.12976
chr3R	6785034	6785636	4.33567
chr3R	6786117	6786510	4.57159
chr3R	6787655	6788221	7.14934
chr3R	6789374	6789738	3.65984
chr3R	6790776	6791040	10.0844
chr3R	6792289	6793103	5.78885
chr3R	6793405	6794159	5.93315
chr3R	6794564	6794926	4.76258
chr3R	6796653	6796896	4.56509
chr3R	6800537	6800740	2.81731
chr3R	6801003	6801600	6.17174
chr3R	6803046	6803462	2.82604
chr3R	6804682	6805175	4.89165
chr3R	6806063	6806272	22.8868
chr3R	6825992	6826353	16.3929
chr3R	6831757	6832049	17.6293
chr3R	6832443	6832696	4.4901
chr3R	6832969	6833173	9.81776
chr3R	6836815	6837091	5.5859
chr3R	6838497	6838960	5.05458
chr3R	6840148	6840515	3.108
chr3R	6841221	6842238	6.07003
chr3R	6842976	6843975	6.90449
chr3R	6844792	6845068	2.19123
chr3R	6845360	6845752	3.00931
chr3R	6846487	6847438	3.38731
chr3R	6849655	6850006	21.0399
chr3R	6851402	6851647	2.66652
chr3R	6851995	6852649	15.0904
chr3R	6853392	6853905	4.2877
chr3R	6864478	6864851	8.73188
chr3R	6868069	6868379	2.80778
chr3R	6871827	6872550	7.71854
chr3R	6873077	6873599	6.55391
chr3R	6874529	6874973	3.99448
chr3R	6875186	6875697	3.05533
chr3R	6876274	6876687	8.54537
chr3R	6877035	6877236	5.49358
chr3R	6878613	6879139	2.58274
chr3R	6880446	6880781	10.1366
chr3R	6881007	6881429	10.8283
chr3R	6882251	6882466	7.42305
chr3R	6883070	6883389	10.1359
chr3R	6884050	6884658	10.9616
chr3R	6885489	6885746	2.55592
chr3R	6887623	6888253	6.93224
chr3R	6888545	6889257	4.25186
chr3R	6889522	6889820	6.19602
chr3R	6890777	6891160	3.04624
chr3R	6891275	6891534	18.7732
chr3R	6891772	6892276	3.97481
chr3R	6893927	6894185	4.35328
chr3R	6899595	6900046	17.4225
chr3R	6900828	6901216	2.38338
chr3R	6901544	6901871	7.73741
chr3R	6902538	6902791	7.70402
chr3R	6903947	6904823	5.70792
chr3R	6905122	6905472	16.9128
chr3R	6905957	6906337	12.4082
chr3R	6906653	6906895	3.41801
chr3R	6913558	6914060	10.8525
chr3R	6914584	6915039	19.514
chr3R	6915229	6915431	5.81297
chr3R	6915560	6916266	14.978
chr3R	6916709	6917126	15.184
chr3R	6917511	6917954	15.5377
chr3R	6922451	6922862	18.4577
chr3R	6927955	6928176	10.4709
chr3R	6934829	6935055	1.56924
chr3R	6935555	6935918	4.93222
chr3R	6936509	6936884	12.939
chr3R	6941774	6942004	2.4154
chr3R	6951547	6951811	5.83229
chr3R	6954915	6955148	2.71722
chr3R	6955581	6955888	15.6016
chr3R	6967970	6968331	7.15287
chr3R	6978139	6978427	13.1131
chr3R	6979286	6979544	5.96474
chr3R	6983996	6984320	4.18478
chr3R	6985586	6985831	22.6233
chr3R	6986187	6986933	4.84425
chr3R	6987532	6987752	5.05435
chr3R	6990265	6990482	5.16878
chr3R	6990742	6991289	6.25682
chr3R	6992651	6993022	7.61691
chr3R	6994834	6995100	16.8694
chr3R	6995290	6995552	4.55412
chr3R	6995938	6996169	32.8445
chr3R	6996587	6996902	6.46132
chr3R	6997264	6997669	13.4741
chr3R	6998966	6999557	4.88201
chr3R	7002140	7002487	4.97239
chr3R	7002730	7003086	15.9867
chr3R	7003696	7003970	6.91996
chr3R	7004768	7005075	7.00555
chr3R	7005475	7005759	13.6451
chr3R	7009046	7009404	11.8561
chr3R	7017142	7017476	20.2598
chr3R	7018318	7018520	9.40874
chr3R	7026697	7026921	12.6841
chr3R	7027355	7027851	4.78853
chr3R	7030000	7030482	5.1042
chr3R	7033683	7034160	14.7631
chr3R	7034517	7034842	6.22747
chr3R	7035348	7036267	5.83225
chr3R	7038587	7039611	7.13727
chr3R	7730227	7730621	4.1379
chr3R	7930247	7930544	10.8431
chr3R	7931404	7932050	11.4293
chr3R	7932549	7933015	4.37989
chr3R	7938433	7939302	6.7371
chr3R	7940055	7940260	6.75545
chr3R	7941145	7941422	8.5165
chr3R	7943179	7943550	4.08277
chr3R	7952728	7953030	15.9147
chr3R	7960423	7960833	12.3035
chr3R	7962724	7962975	11.4298
chr3R	8166066	8166287	22.0923
chr3R	8167116	8167449	12.9574
chr3R	8168890	8169181	24.8199
chr3R	8175776	8175986	24.5447
chr3R	8177038	8177347	11.0174
chr3R	8179385	8179696	4.70671
chr3R	8179972	8180585	12.3447
chr3R	8182069	8182739	3.51506
chr3R	8183501	8184234	8.93016
chr3R	8185277	8186059	4.45136
chr3R	8186215	8187741	4.6397
chr3R	8189270	8189560	19.8999
chr3R	8189796	8190393	4.74597
chr3R	8191413	8191807	4.89521
chr3R	8193235	8193515	2.56803
chr3R	8194783	8195344	5.28312
chr3R	8195789	8196360	6.17966
chr3R	8200862	8201150	2.08283
chr3R	8205493	8205794	12.2343
chr3R	8206229	8206542	12.3262
chr3R	8213191	8213780	4.59736
chr3R	8214237	8214626	2.78395
chr3R	8230851	8231089	2.72079
chr3R	8275553	8276080	6.68025
chr3R	8276833	8277174	3.63662
chr3R	8277288	8277605	3.51552
chr3R	8278105	8278412	4.3594
chr3R	8278764	8279824	5.46102
chr3R	8280850	8281680	4.0436
chr3R	8281959	8282720	5.38419
chr3R	8283941	8284144	4.59946
chr3R	8285127	8285496	9.56526
chr3R	8289937	8290155	3.36199
chr3R	8292434	8292707	9.7268
chr3R	8320614	8320965	17.812
chr3R	8324304	8324820	2.82354
chr3R	8326069	8326568	8.29496
chr3R	8330156	8330459	16.2696
chr3R	8331508	8331896	1.52217
chr3R	8332130	8332419	2.06979
chr3R	8332679	8333311	5.06307
chr3R	8335727	8336119	2.52694
chr3R	8336716	8336928	4.20311
chr3R	8476128	8476443	13.2577
chr3R	8682745	8683041	22.2341
chr3R	8702656	8702876	2.69297
chr3R	8966982	8967255	4.57511
chr3R	8968509	8968783	21.7792
chr3R	9856284	9856546	7.56714
chr3R	10366505	10367293	6.67213
chr3R	10368880	10369275	4.94806
chr3R	10369792	10370109	3.7233
chr3R	10372159	10372367	12.3715
chr3R	10372734	10372934	7.4738
chr3R	10419788	10419991	5.03353
chr3R	10550356	10550791	8.25
chr3R	10635818	10636057	6.1954
chr3R	10648612	10648852	7.66021
chr3R	10665248	10665713	8.22491
chr3R	10960175	10960386	5.05832
chr3R	10960717	10961111	17.6507
chr3R	10961738	10961996	7.88084
chr3R	10962871	10963184	4.77742
chr3R	11246102	11246343	12.2227
chr3R	11265230	11265572	13.733
chr3R	11270006	11270278	2.48045
chr3R	11271985	11272317	25.9219
chr3R	11277283	11277493	14.1889
chr3R	11299832	11300175	4.5706
chr3R	11301243	11301546	7.56005
chr3R	11305090	11305290	3.67804
chr3R	11354228	11355251	6.99141
chr3R	11355385	11355820	7.18863
chr3R	11356224	11357123	6.85844
chr3R	11357732	11357934	4.62125
chr3R	11367242	11367508	12.355
chr3R	11370342	11370676	3.87204
chr3R	11371616	11371820	26.2076
chr3R	11373809	11374159	14.382
chr3R	11374818	11375155	2.76772
chr3R	11376002	11376217	26.424
chr3R	11376498	11376812	10.2765
chr3R	11438566	11438766	7.29633
chr3R	11542709	11542928	13.4859
chr3R	11641644	11641844	9.16278
chr3R	11662888	11663096	21.7696
chr3R	11687699	11687912	28.1488
chr3R	11947190	11947406	4.45552
chr3R	12002517	12002732	4.31042
chr3R	12241166	12241449	3.30878
chr3R	12242691	12243109	16.4564
chr3R	12243210	12243462	10.3247
chr3R	12246046	12246500	10.3198
chr3R	12246825	12247079	10.2175
chr3R	12247900	12248732	6.82155
chr3R	12249460	12249660	1.86215
chr3R	12250465	12251186	6.00021
chr3R	12251930	12252233	5.05082
chr3R	12254385	12254668	5.44374
chr3R	12255131	12255486	5.81725
chr3R	12255877	12256633	5.8822
chr3R	12259626	12260152	10.2998
chr3R	12261384	12261584	3.98075
chr3R	12265002	12265202	8.87837
chr3R	12265706	12266008	8.92846
chr3R	12266348	12266974	10.3023
chr3R	12276523	12276725	6.48544
chr3R	12277697	12278071	11.4859
chr3R	12278527	12278813	6.06568
chr3R	12281591	12282661	5.66436
chr3R	12473231	12473480	11.8525
chr3R	12474894	12475160	9.96406
chr3R	12476528	12476754	5.72881
chr3R	12479177	12479416	7.69352
chr3R	12503609	12503862	3.71496
chr3R	12954667	12954897	29.4227
chr3R	13058397	13058830	12.9833
chr3R	13060711	13060911	7.00208
chr3R	13061203	13061541	14.7498
chr3R	13062159	13062554	3.4683
chr3R	13067361	13067581	5.37939
chr3R	13067700	13067958	2.23756
chr3R	13069004	13069468	4.01448
chr3R	13069990	13070749	5.63079
chr3R	13072501	13072896	3.42177
chr3R	13073209	13073430	7.50936
chr3R	13073716	13074504	3.88578
chr3R	13074882	13075231	2.00994
chr3R	13075783	13076238	3.08364
chr3R	13076566	13077272	7.07493
chr3R	13793235	13793435	8.21507
chr3R	13801896	13802130	15.9762
chr3R	13803602	13803802	7.28712
chr3R	13805227	13805427	5.59837
chr3R	13811547	13812199	4.56311
chr3R	13813640	13814131	5.92847
chr3R	13814572	13814892	4.98379
chr3R	13815057	13815298	5.64799
chr3R	13858347	13858562	6.57263
chr3R	13867601	13868016	8.57661
chr3R	13868478	13868758	5.59718
chr3R	13873359	13874253	6.87713
chr3R	13874616	13875411	3.10916
chr3R	13875760	13876620	6.07806
chr3R	13877931	13878337	3.31489
chr3R	13878638	13878950	4.60714
chr3R	13879387	13879997	5.13924
chr3R	13880403	13880810	4.23078
chr3R	13881188	13881654	8.54309
chr3R	13883040	13883491	4.01107
chr3R	13883705	13884139	7.64647
chr3R	13885639	13885883	6.23589
chr3R	13887185	13887446	14.5215
chr3R	13887834	13888320	6.40037
chr3R	13888698	13889133	26.1454
chr3R	13894733	13895200	5.3969
chr3R	13898045	13898636	9.84299
chr3R	13899811	13900014	21.9495
chr3R	13900461	13900725	5.148
chr3R	13900993	13901214	4.4976
chr3R	13902171	13903292	5.67668
chr3R	13903589	13904049	6.63216
chr3R	13905272	13905571	18.3676
chr3R	13906530	13906901	3.40876
chr3R	13912580	13912827	1.80751
chr3R	13918390	13918600	26.3985
chr3R	13929137	13929403	7.68508
chr3R	13966681	13966928	3.80356
chr3R	13979541	13980432	6.75148
chr3R	14113705	14113905	17.6167
chr3R	15137886	15138128	7.62485
chr3R	15563078	15563294	22.3058
chr3R	15658475	15658677	4.82463
chr3R	15943009	15943209	21.8735
chr3R	15990349	15990571	7.1254
chr3R	15990875	15991526	3.76019
chr3R	15993990	15994243	6.67042
chr3R	16003006	16003437	16.231
chr3R	16010049	16010280	6.27111
chr3R	16011448	16011934	4.91972
chr3R	16012064	16012427	13.9463
chr3R	16015728	16016227	14.1516
chr3R	16016862	16017062	5.21271
chr3R	16017816	16018306	4.6639
chr3R	16020355	16020568	6.85535
chr3R	16020832	16021104	10.1943
chr3R	16022630	16022863	17.9433
chr3R	16023288	16023499	5.61746
chr3R	16023758	16024068	5.25799
chr3R	16024193	16024846	10.4278
chr3R	16027515	16028084	9.3629
chr3R	16030267	16030638	10.6467
chr3R	16031015	16031218	7.12393
chr3R	16032296	16033161	3.80477
chr3R	16035583	16035951	11.1644
chr3R	16038593	16039219	6.48596
chr3R	16039403	16040275	8.93794
chr3R	16198930	16199138	8.90407
chr3R	16328744	16329043	26.7109
chr3R	16386134	16386353	4.67218
chr3R	16387309	16387522	16.0088
chr3R	16392944	16393307	11.9106
chr3R	16401076	16401414	6.28998
chr3R	16401698	16402012	5.18308
chr3R	16403012	16403299	3.13425
chr3R	16404927	16405273	5.4621
chr3R	16406793	16407081	7.21907
chr3R	16407524	16408152	19.7184
chr3R	16408876	16409102	3.23063
chr3R	16410479	16411099	5.09916
chr3R	16411718	16411965	5.85504
chr3R	16412203	16412720	8.4228
chr3R	16415922	16417019	4.87109
chr3R	16417318	16417648	3.8291
chr3R	16418391	16418777	14.0532
chr3R	16419432	16419764	7.86657
chr3R	16420381	16420800	8.04324
chr3R	16421237	16421770	17.9478
chr3R	16422072	16422279	4.3435
chr3R	16424058	16424590	4.04498
chr3R	16426347	16426592	5.30786
chr3R	16522627	16522891	21.5674
chr3R	16662399	16662757	5.01965
chr3R	16664603	16665104	8.79043
chr3R	16666637	16667365	10.4608
chr3R	16667531	16667938	2.97216
chr3R	16671302	16671697	11.1226
chr3R	16672287	16672661	5.1354
chr3R	16673485	16673838	3.43943
chr3R	16674342	16674856	5.57293
chr3R	16676105	16676462	4.67375
chr3R	16677088	16677327	2.25558
chr3R	16679225	16680381	5.25571
chr3R	16681140	16681534	3.16783
chr3R	16683601	16684208	4.98142
chr3R	16685100	16685357	3.87241
chr3R	16687079	16687426	9.59624
chr3R	16687949	16688152	14.2063
chr3R	16690570	16691460	7.81712
chr3R	16692108	16692344	7.18347
chr3R	16693817	16694065	5.25654
chr3R	16694573	16695121	8.51011
chr3R	16695583	16695827	6.73376
chr3R	16696687	16697115	2.46834
chr3R	16697899	16698544	6.66511
chr3R	16703730	16704379	6.46983
chr3R	16704526	16704755	5.78829
chr3R	16712031	16712264	6.63862
chr3R	16713809	16714133	22.1269
chr3R	16716743	16717113	2.34272
chr3R	16717670	16718075	6.82489
chr3R	16718291	16718596	4.10756
chr3R	16718925	16719214	13.9229
chr3R	16720866	16721289	7.17299
chr3R	16723723	16724129	3.77358
chr3R	16724717	16725051	3.6053
chr3R	16727882	16728430	19.9723
chr3R	16731485	16731777	4.30579
chr3R	16732668	16733354	3.77196
chr3R	16735515	16736227	12.2005
chr3R	16736660	16737038	13.4151
chr3R	16738647	16739024	9.41364
chr3R	16740786	16741181	3.13661
chr3R	16745591	16745871	11.6269
chr3R	16745994	16746404	5.16183
chr3R	16747093	16747295	4.21114
chr3R	16747637	16748241	5.47164
chr3R	16751860	16752504	5.67044
chr3R	16753089	16753698	3.04737
chr3R	16754999	16755511	4.64089
chr3R	16762543	16762863	5.04949
chr3R	16763446	16763664	1.81225
chr3R	16764486	16764707	3.95161
chr3R	16767725	16767997	2.26075
chr3R	16769938	16770174	3.52299
chr3R	16770821	16771025	22.9506
chr3R	16773293	16773579	3.30204
chr3R	16774267	16774467	11.4838
chr3R	16774572	16775085	5.58001
chr3R	16781761	16782180	3.55362
chr3R	16785235	16785435	4.86789
chr3R	16788390	16788802	16.1487
chr3R	16789498	16789814	3.934
chr3R	16792664	16792879	27.3081
chr3R	16802515	16802909	1.63286
chr3R	16803258	16803650	3.77981
chr3R	16804146	16804434	8.64664
chr3R	16805010	16805836	5.42415
chr3R	16806125	16806607	3.67809
chr3R	16809068	16811217	5.77005
chr3R	16812816	16813036	1.66499
chr3R	16813718	16814095	10.8105
chr3R	16814326	16815390	5.64875
chr3R	16815915	16816331	10.8965
chr3R	16817011	16817386	5.49426
chr3R	16817529	16818198	6.19919
chr3R	16819153	16819511	8.89054
chr3R	16819624	16819842	3.09121
chr3R	16820877	16821385	6.7919
chr3R	16821651	16821992	17.5525
chr3R	16823398	16823902	4
chr3R	16824008	16824353	3.36863
chr3R	16825045	16825300	5.57602
chr3R	16826023	16826260	6.79948
chr3R	16827103	16828076	5.8687
chr3R	16830547	16830778	8.50188
chr3R	16836351	16836720	3.65644
chr3R	16838877	16839261	8.11058
chr3R	16839484	16839792	10.4354
chr3R	16843874	16844096	7.18828
chr3R	16846974	16847333	2.91612
chr3R	16847462	16847663	1.96718
chr3R	16847824	16848110	7.23569
chr3R	16848366	16848954	4.8054
chr3R	16849465	16850324	6.126
chr3R	16850980	16851273	10.1983
chr3R	16852237	16852531	5.91806
chr3R	16852691	16853245	11.2518
[truncated: 1,121 more rows]

## Sheet: downregulated regions-re1
downregulated regions-re1
chromosome	start	end	log10 likelihood ratio
chr2R	20623401	20623602	7.75672
chr3L	9356264	9356465	3.8739
chrM	14	490	7.72826
chrM	1160	6402	5.42805
chrM	6662	7990	5.57232
chrM	8206	9166	5.93936
chrM	10268	13660	7.59781
chrM	13885	14699	5.89364
chrUn_DS484916v1	659	952	4.72783

## Sheet: downregulated regions-re2
downregulated regions-re2
chromosome	start	end	log10 likelihood ratio
chr2L	1358043	1358288	8.71527
chr2L	11901697	11901898	6.91991
chr3L	2947193	2947411	8.64218
chrM	15	698	12.6059
chrM	1148	6406	11.5451
chrM	6687	7971	14.1135
chrM	8239	9201	16.1889
chrM	10298	13666	15.2105
chrM	13888	14716	13.4885
chrM	18192	18406	16.9629
