# Supplementary material for: Exposure to high-sugar diet induces transgenerational changes in sweet sensitivity and feeding behavior via H3K27me3 reprogramming
Source: eLife. 2023 Sep 12;12:e85365. doi: 10.7554/eLife.85365 (PMC10558205; doi:10.7554/eLife.85365)
Supplement: Supplementary file 3. — The head tissues of HSD-F1 vs. normal diet (ND) flies were collected and subjected to RNA-seq analysis. The difference gene of RNA-seq data were found by using DEseq2. The cutoff is p-value less than 0.05 and |log1.5fold change| more than 1 (n=3 biological replicates, each containing 15 fly heads). [file elife-85365-supp3.xlsx]

## Sheet: upregulated gene
upregulated gene
geneid	baseMean	log1.5FoldChange	lfcSE	stat	pvalue	SYMBOL
CG31288	539.319	1.03282	0.178941	-3.37631	0.000734643	CG31288
CG1738	66.8175	1.03472	0.2662	-2.27375	0.0229808	CG1738
CR43900	95.2916	1.06892	0.277542	-2.25291	0.0242648	lncRNA:CR43900
CG14642	204.383	1.09843	0.259141	-2.47951	0.0131561	CG14642
CG15361	277.358	1.10944	0.213434	-3.04067	0.00236053	Nplp4
CG34195	53.2789	1.11989	0.330213	-1.98386	0.047272	CG34195
CG31509	16367.4	1.13228	0.221426	-2.99126	0.0027783	TotA
CG11842	596.212	1.15882	0.183287	-3.69838	0.000216981	CG11842
CG17664	43.9361	1.16702	0.331993	-2.05627	0.0397567	Eglp2
CG30026	560.842	1.17099	0.166926	-4.10353	4.07e-05	CG30026
CG31193	1039.11	1.21899	0.245074	-2.9096	0.00361895	TotX
CG5999	160.291	1.24728	0.240247	-3.03693	0.00238997	Ugt37A3
CG18743	108.823	1.3302	0.345901	-2.24954	0.0244784	Hsp70Ab
CG4120	723.303	1.34823	0.190401	-4.14211	3.44e-05	Cyp12c1
CG5834	71.7394	1.38214	0.343594	-2.35307	0.0186192	Hsp70Bbb
CG7203	8282.47	1.38896	0.378504	-2.14658	0.0318271	CG7203
CG13641	172.012	1.41186	0.275295	-2.99999	0.0026999	CG13641
CG43071	158.811	1.42443	0.262816	-3.17042	0.0015222	CG43071
CG31449	30.694	1.43962	0.404365	-2.08258	0.0372894	Hsp70Ba
CG18144	26.9794	1.48045	0.392619	-2.20573	0.0274032	Hand
CG43179	38.6427	1.48412	0.389548	-2.22862	0.0258395	CG43179
CG18477	30.8134	1.49959	0.377796	-2.3219	0.0202386	CG18477
CG18106	10841.1	1.52295	0.378391	-2.35436	0.0185546	BomS2
CG18067	20991.2	1.59923	0.162023	-5.7738	7.75e-09	CG18067
CG9989	215.426	1.60887	0.234383	-4.01535	5.94e-05	Sid
CG9681	5303	1.62799	0.220276	-4.32326	1.54e-05	PGRP-SB1
CG34136	592.091	1.63637	0.481426	-1.98829	0.0467798	CG34136
CG11459	210.862	1.64112	0.348417	-2.7553	0.00586391	CG11459
CG6687	2300.56	1.69619	0.167571	-5.9211	3.2e-09	Spn88Eb
CG5791	1243.88	1.76469	0.426871	-2.41823	0.015596	BomBc3
CG33470	7795.03	1.79838	0.222037	-4.73787	2.16e-06	CG33470
CG31904	1101.65	1.80724	0.257859	-4.09981	4.13e-05	CG31904
CG18279	7778.12	1.81497	0.2196	-4.83466	1.33e-06	IMPPP
CG12206	18.8167	1.82573	0.483917	-2.20695	0.0273176	CG12206
CG31366	102.857	1.8549	0.314876	-3.44595	0.000569063	Hsp70Aa
CG42586	63.9925	1.90324	0.362067	-3.07491	0.00210568	CG42586
CG43236	91.3512	1.94839	0.312744	-3.64431	0.00026811	CG43236
CG43202	196.673	1.95324	0.225366	-5.06984	3.98e-07	BomT1
CG31508	5730.82	1.95735	0.227027	-5.04336	4.57e-07	TotC
CG18108	7297.74	1.95971	0.379154	-3.02346	0.002499	BomS1
CG5195	30.6568	2.00406	0.597856	-1.96084	0.0498977	atk
CG12662	28.1143	2.00817	0.485155	-2.42129	0.0154654	CG12662
CG7216	2390.61	2.03296	0.438316	-2.71313	0.0066651	Acp1
CG13749	18.7424	2.13779	0.563356	-2.21978	0.0264335	CG13749
CG30160	44.2505	2.19922	0.436044	-2.9503	0.00317466	CG30160
CG31775	56.1871	2.21221	0.32937	-3.9289	8.53e-05	CG31775
CG7249	9.93121	2.22308	0.661652	-1.96542	0.0493662	Cyp6a16
CG33469	20.6143	2.26016	0.600717	-2.20089	0.0277441	CG33469
CG3656	19.906	2.33946	0.481521	-2.84202	0.00448283	Cyp4d1
CG2723	8.69017	2.38681	0.699279	-1.99662	0.0458665	ImpE3
CG34054	386.474	2.40873	0.53808	-2.6186	0.00882923	CG34054
CG5609	17.1923	2.57425	0.535088	-2.81419	0.00489007	TotB
CG10810	6366.23	2.59201	0.449215	-3.37528	0.000737394	Drs
CG43175	571.859	2.64366	0.576844	-2.68087	0.00734314	CG43175
CG1385	988.987	2.71485	0.692944	-2.2918	0.0219174	Def
CG13422	2406.72	2.9852	0.145737	-11.9821	4.41e-33	GNBP-like3
CG3410	36.7102	2.98628	0.591823	-2.95166	0.00316067	lectin-24A
CG6046	616.093	3.02021	0.212117	-8.32893	8.16e-17	Bin1
CG4740	24001.3	3.08526	0.699214	-2.58113	0.00984783	AttC
CG11501	434.69	3.11256	0.278742	-6.53197	6.49e-11	Diedel
CG18372	7701.47	3.15929	0.753458	-2.45278	0.0141758	AttB
CR32864	15.6744	3.21999	0.771012	-2.44299	0.0145662	7SLRNA:CR32864
CG15066	922.464	3.34011	0.166416	-11.7407	7.89e-32	BomBc1
CG8175	3256.25	3.34808	0.194878	-10.0499	9.2e-24	Mtk
CG15482	9.46812	3.39787	0.907045	-2.19132	0.0284286	CG15482
CG12111	6.38559	3.46659	0.940398	-2.15635	0.0310566	CG12111
CG31439	5.8378	3.54605	0.926923	-2.23784	0.0252313	Muc96D
CG10146	3943.53	3.54693	0.962642	-2.15534	0.0311353	AttA
CG32639	4.84998	3.99029	1.10119	-2.11967	0.034034	CG32639
CG3880	3.94521	4.0529	1.13916	-2.08118	0.0374173	CG3880
CR44775	6.48442	4.2847	1.21694	-2.05959	0.0394376	lncRNA:CR44775
CG32793	3.174	5.35289	1.54621	-2.02511	0.0428559	CG32793
CG10816	23329.1	5.53244	0.859486	-3.76535	0.000166313	Dro
CG45045	792.997	5.54704	0.463111	-7.00655	2.44e-12	CG45045
CG18563	40.6444	5.5852	0.425358	-7.68089	1.58e-14	CG18563
CG9988	32.6905	5.74447	1.47653	-2.27582	0.0228571	CG9988
CG3117	3.81944	5.92741	1.40131	-2.47434	0.0133481	CG3117
CG44404	1068.37	6.06978	1.32499	-2.6797	0.00736871	IBIN
CG12934	2.17943	6.09306	1.77272	-2.01059	0.0443686	CG12934
CG2839	1.39432	6.8035	2.02036	-1.96985	0.0488559	CG2839
CG31226	1.39711	6.80705	1.97406	-2.0171	0.0436855	CG31226
CG14745	953.124	6.91773	0.828376	-4.885	1.03e-06	PGRP-SC2
CG6639	116.45	9.21969	0.460854	-11.7026	1.24e-31	SPH93
CG43920	635.951	10.2321	0.821405	-7.28677	3.17e-13	CG43920

## Sheet: downregulated gene
downregulated gene
geneid	baseMean	log1.5FoldChange	lfcSE	stat	pvalue	SYMBOL
CG15649	21.6896	-10.1618	1.37894	4.31077	1.63e-05	CG15649
CG11029	37.5404	-9.42349	2.26511	2.43361	0.014949	CG11029
CG43134	77.0758	-8.13235	1.87225	2.54086	0.0110581	CG43134
CG7306	2.12082	-7.65779	2.08377	2.14972	0.0315775	obst-F
CG18675	2.75747	-6.47855	1.59506	2.3759	0.017506	CG18675
CG11420	3.68307	-5.58228	1.39756	2.33652	0.0194641	png
CG5988	5.43143	-4.85811	1.08193	2.6266	0.00862415	upd2
CG5637	9.07458	-4.72416	1.21416	2.27602	0.0228449	nos
CG1759	6.11201	-4.50539	1.23511	2.1338	0.0328588	cad
CG14309	12.501	-4.268	1.10872	2.2518	0.0243349	CG14309
CG10814	1159.79	-3.80681	0.850262	2.619	0.00881872	CG10814
CG9757	7.66254	-3.68149	0.902929	2.38505	0.0170768	CG9757
CG15598	6.0813	-3.19287	0.950338	1.96531	0.0493782	Osi17
CG12306	14.8091	-3.11951	0.927409	1.96763	0.0491109	polo
CG18673	34.7518	-2.92522	0.473561	3.61335	0.000302263	CAH5
CG17738	13.2339	-2.86497	0.658553	2.54482	0.0109333	CG17738
CG34034	18.1868	-2.81697	0.813973	2.02442	0.0429272	CG34034
CG14834	29.638	-2.56447	0.690519	2.17245	0.0298215	CG14834
CG17018	28.2255	-2.48348	0.609448	2.38371	0.0171393	Marf1
CG3972	27.6989	-2.47857	0.543927	2.66556	0.00768597	Cyp4g1
CG7768	28.9383	-2.47443	0.726393	1.99266	0.0462991	CG7768
CG34462	9.67745	-2.41999	0.695629	2.035	0.0418511	CG34462
CG34045	16.624	-2.32824	0.645271	2.11063	0.0348037	CG34045
CG31810	83.7039	-1.9711	0.426792	2.70159	0.00690088	CG31810
CG14191	17.8789	-1.86912	0.551292	1.98328	0.047336	CG14191
CG15737	46.822	-1.77643	0.525506	1.97742	0.0479946	wisp
CG5940	88.4598	-1.71205	0.418634	2.39227	0.0167446	CycA
CG32072	29.7587	-1.69236	0.476026	2.07965	0.0375578	Elo68alpha
CG15497	38.387	-1.69165	0.387678	2.55251	0.0106948	CG15497
CG31106	16.3494	-1.67939	0.500902	1.96122	0.0498532	CG31106
CG2360	28.6749	-1.52854	0.423041	2.1136	0.0345497	Ccp84Aa
CG18377	82.448	-1.47529	0.293591	2.93943	0.00328818	Cyp49a1
CG34227	460.64	-1.44835	0.14597	5.80414	6.47e-09	CG34227
CG6536	84.5407	-1.42496	0.263257	3.16629	0.00154398	mthl4
CG12836	47.9096	-1.41998	0.30443	2.7285	0.00636233	CG12836
CG6733	122.731	-1.38515	0.367699	2.2036	0.0275527	CG6733
CG4105	157.272	-1.35719	0.235762	3.36741	0.000758776	Cyp4e3
CG30395	58.2342	-1.33846	0.396911	1.97261	0.0485398	CG30395
CG7763	58.2585	-1.25688	0.353053	2.08248	0.0372984	CG7763
CG42821	223.585	-1.22945	0.261046	2.75501	0.00586899	CG42821
CG11853	2315.52	-1.16607	0.223022	3.05848	0.00222465	to
CG9759	312.672	-1.15742	0.200307	3.38004	0.000724745	CG9759
CG10962	616.511	-1.13553	0.170024	3.90674	9.35e-05	CG10962
CG1414	71.6904	-1.12713	0.336299	1.96054	0.0499325	bbx
CG18213	53.7175	-1.12174	0.319764	2.05207	0.0401629	CG18213
CG1244	85.6193	-1.11686	0.262678	2.48716	0.0128767	MEP-1
CG10546	51.6941	-1.07534	0.299146	2.10277	0.0354861	Cralbp
CG11797	464.916	-1.03091	0.222448	2.71093	0.00670946	Obp56a
CG6530	120.744	-1.00782	0.218087	2.70321	0.00686743	mthl3
