# Supplementary figures and images for: Exposure to high-sugar diet induces transgenerational changes in sweet sensitivity and feeding behavior via H3K27me3 reprogramming
Source: eLife journal article supplement (doi:10.7554/elife.85365), 2023-09-12

**Figure 3—figure supplement 3**

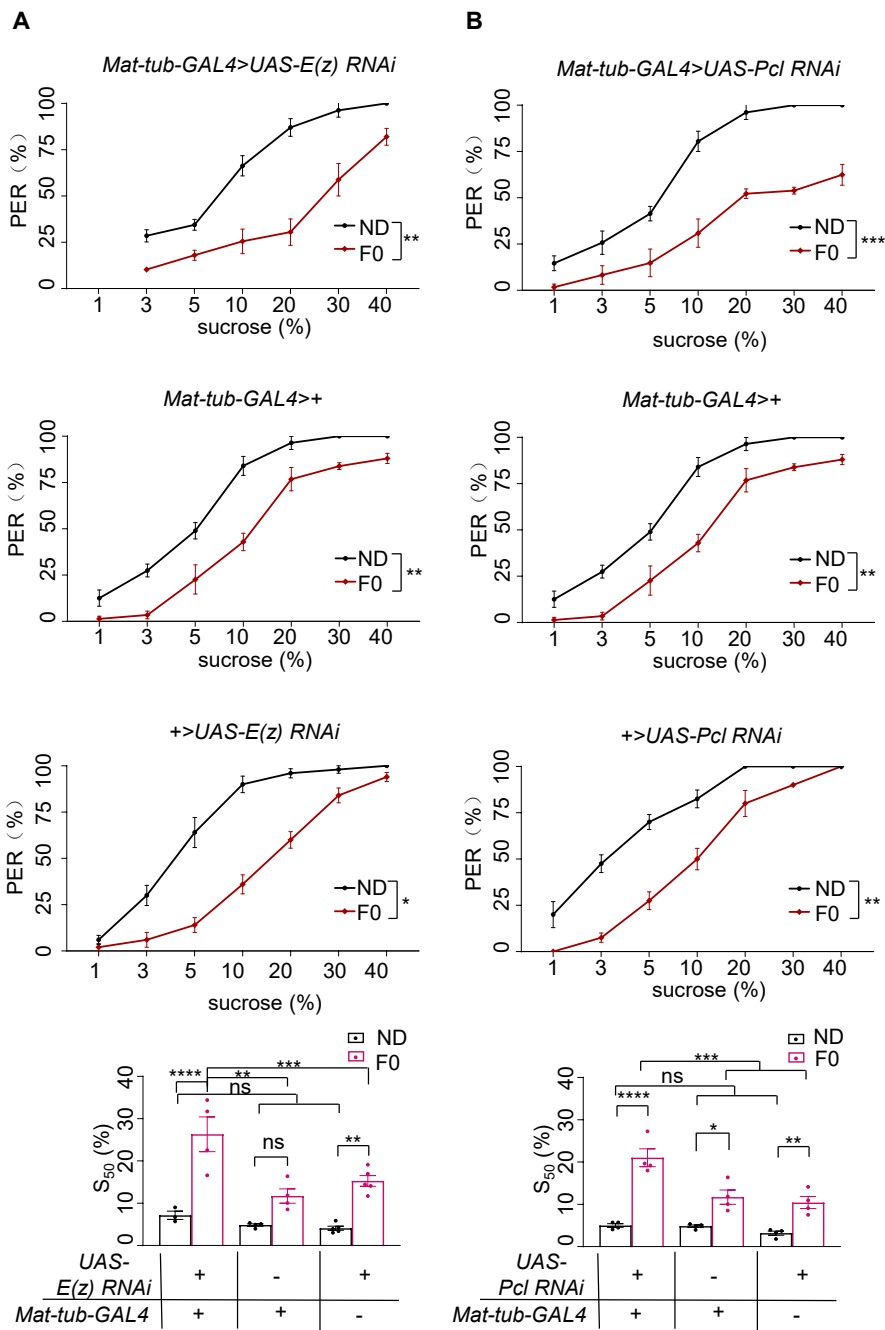

Supplement: supp [file elife-85365-supp-v1.zip]

**Figure 5—figure supplement 1**

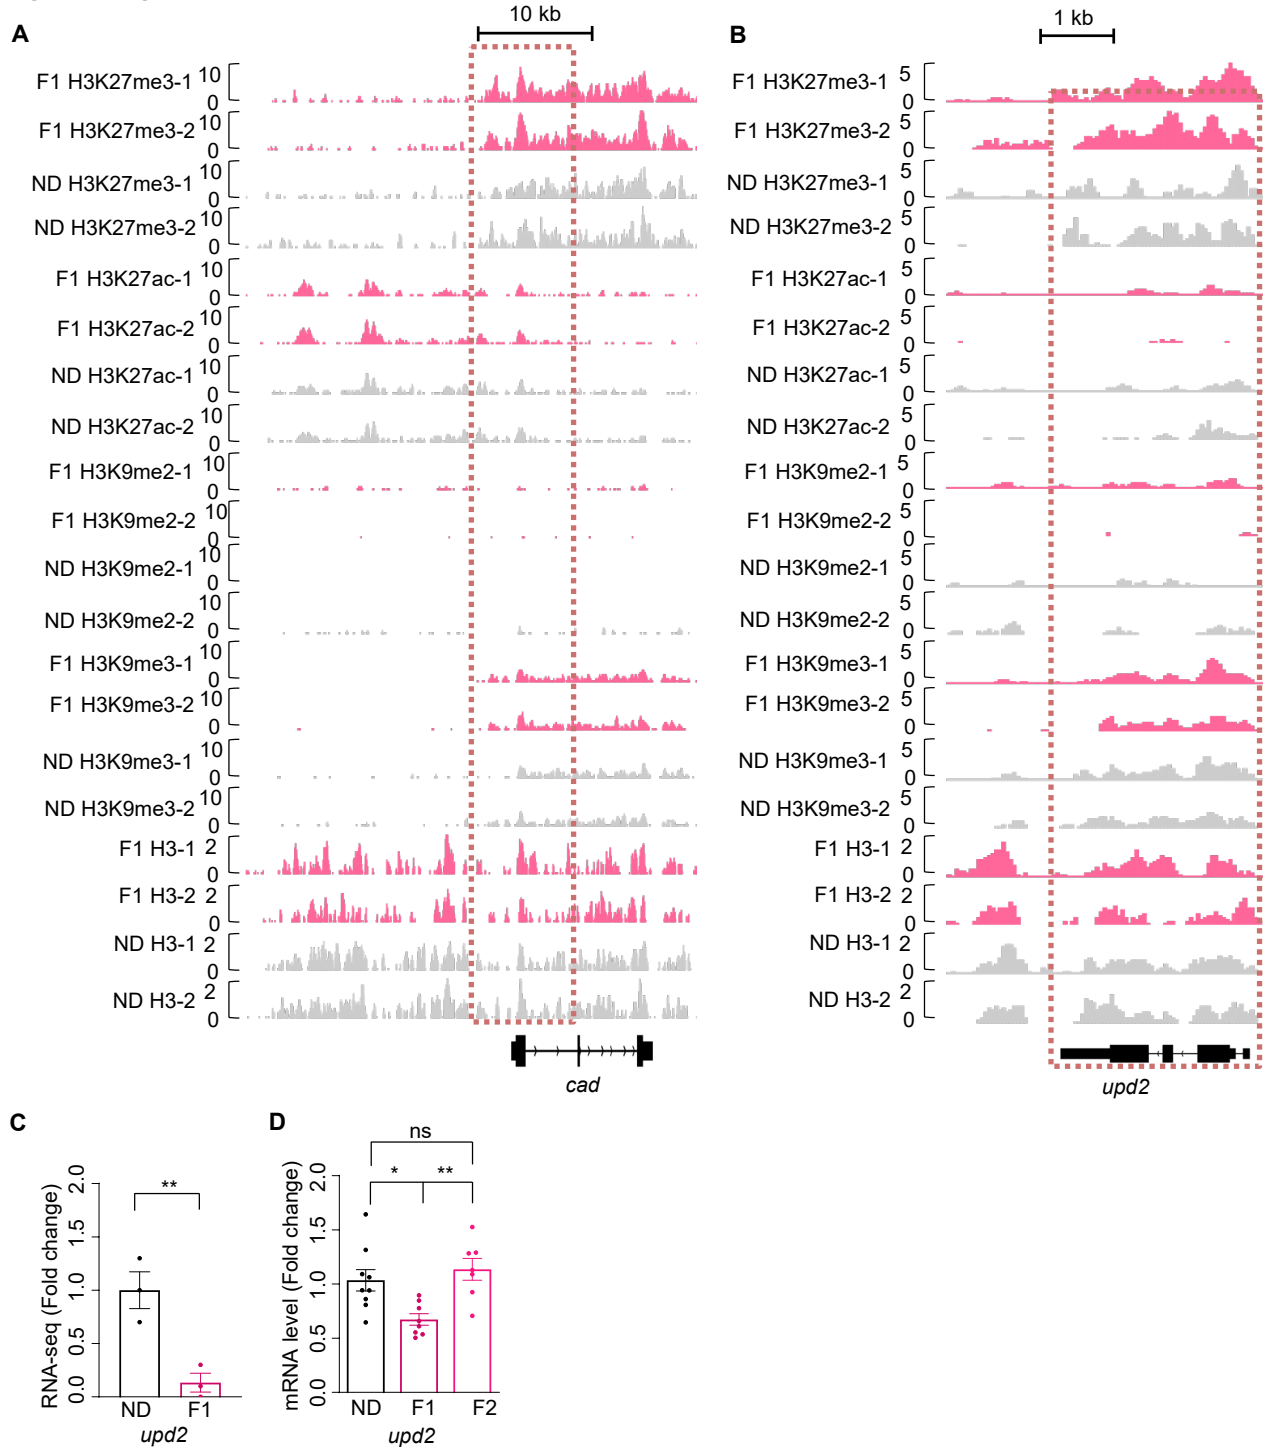

Supplement: supp [file elife-85365-supp-v1.zip]

**A**

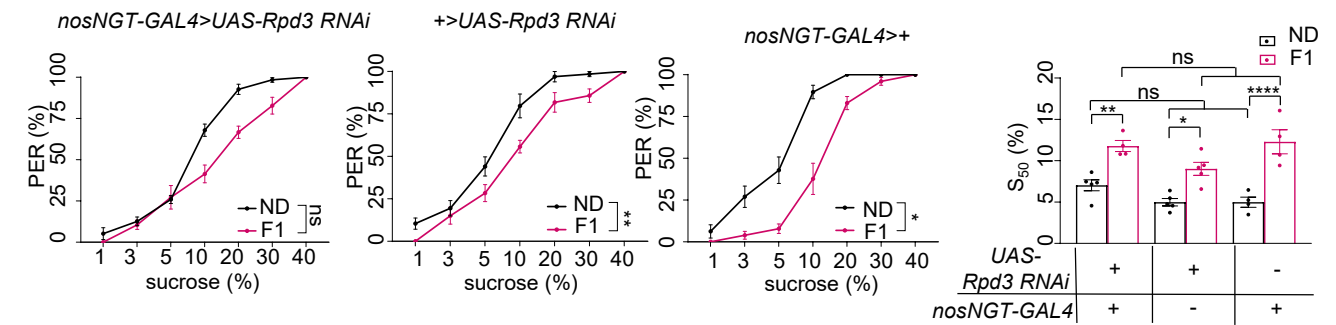

**B**

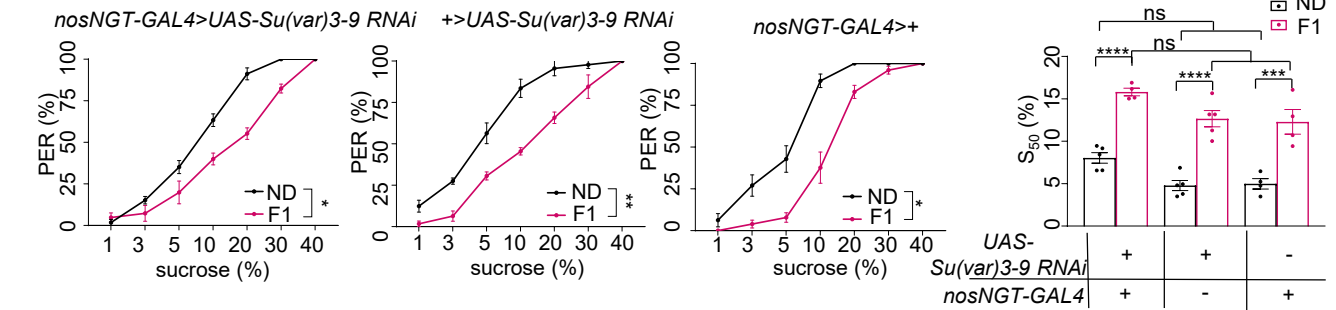

Supplement: supp [file elife-85365-supp-v1.zip]

**Figure 2—figure supplement 2**

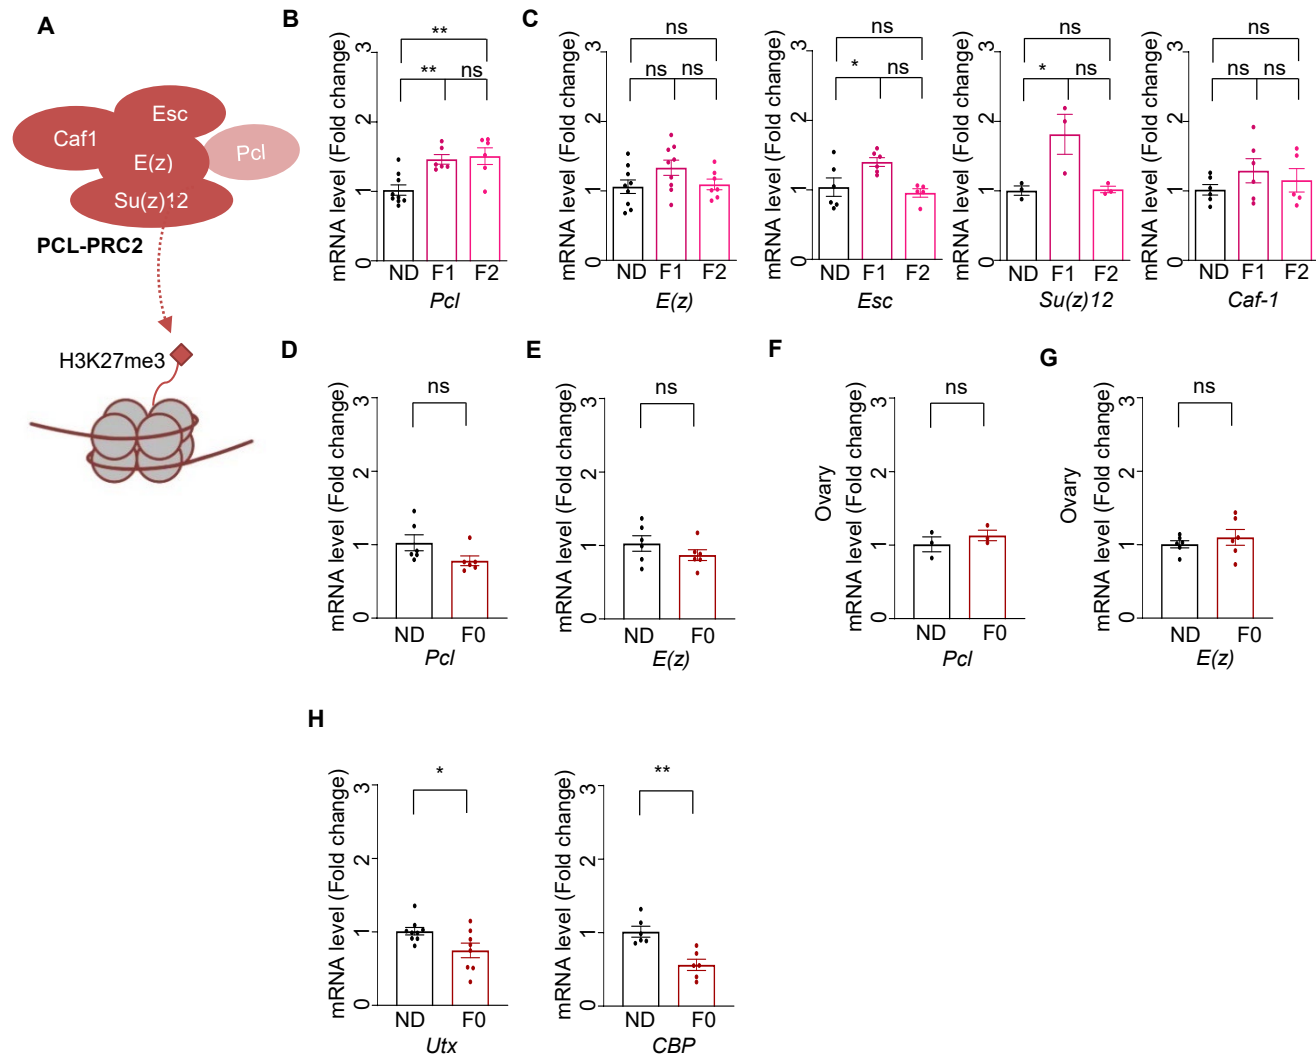

Supplement: supp [file elife-85365-supp-v1.zip]

Figure 3 —figure supplement 1

A

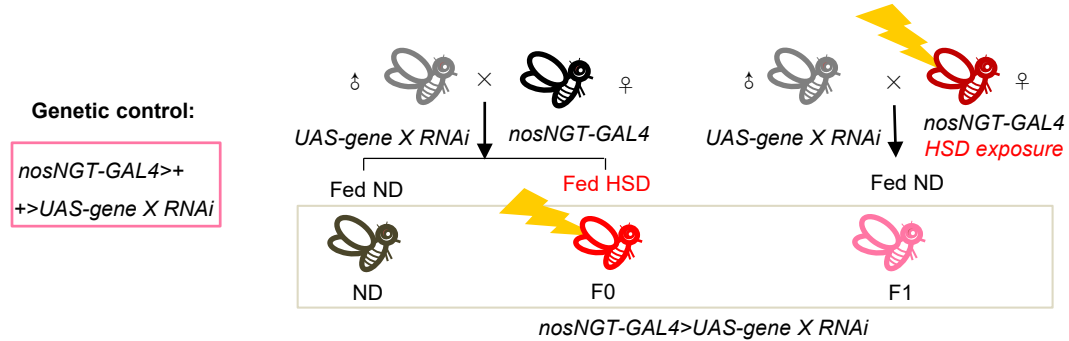

B

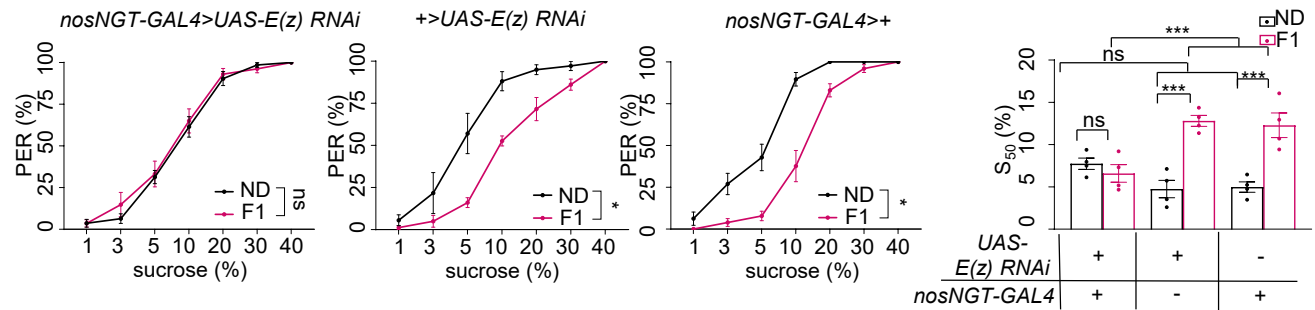

C

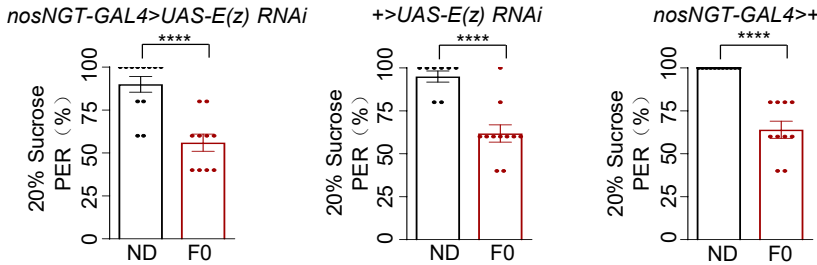

D

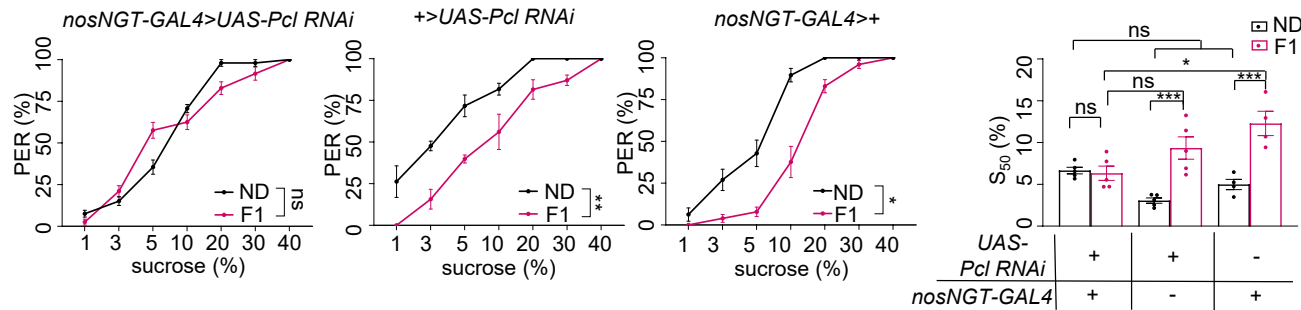

Supplement: supp [file elife-85365-supp-v1.zip]

**Figure 1—figure supplement 1**

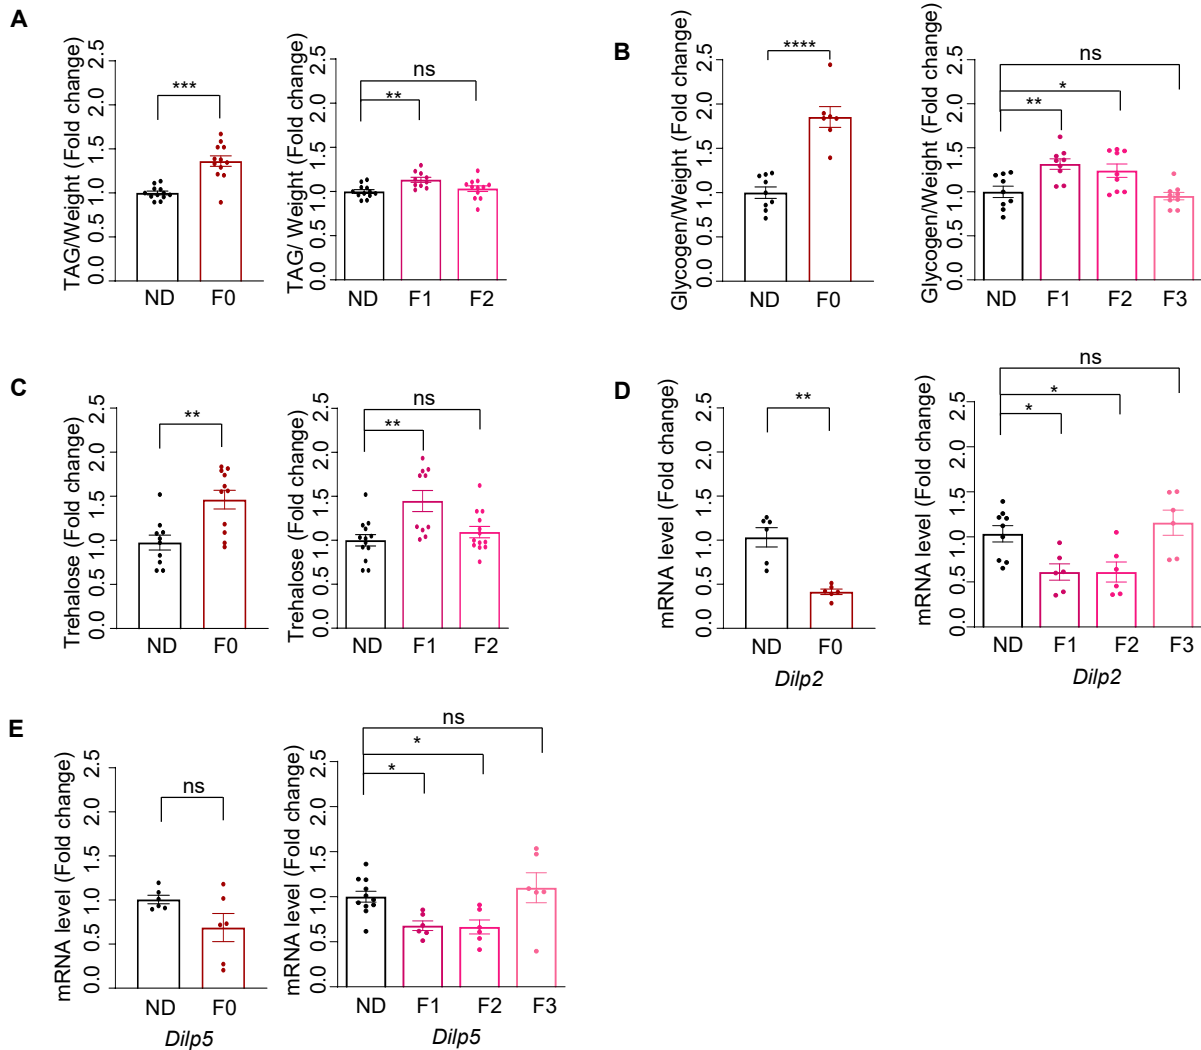

Supplement: supp [file elife-85365-supp-v1.zip]

Figure 2—figure supplement 1

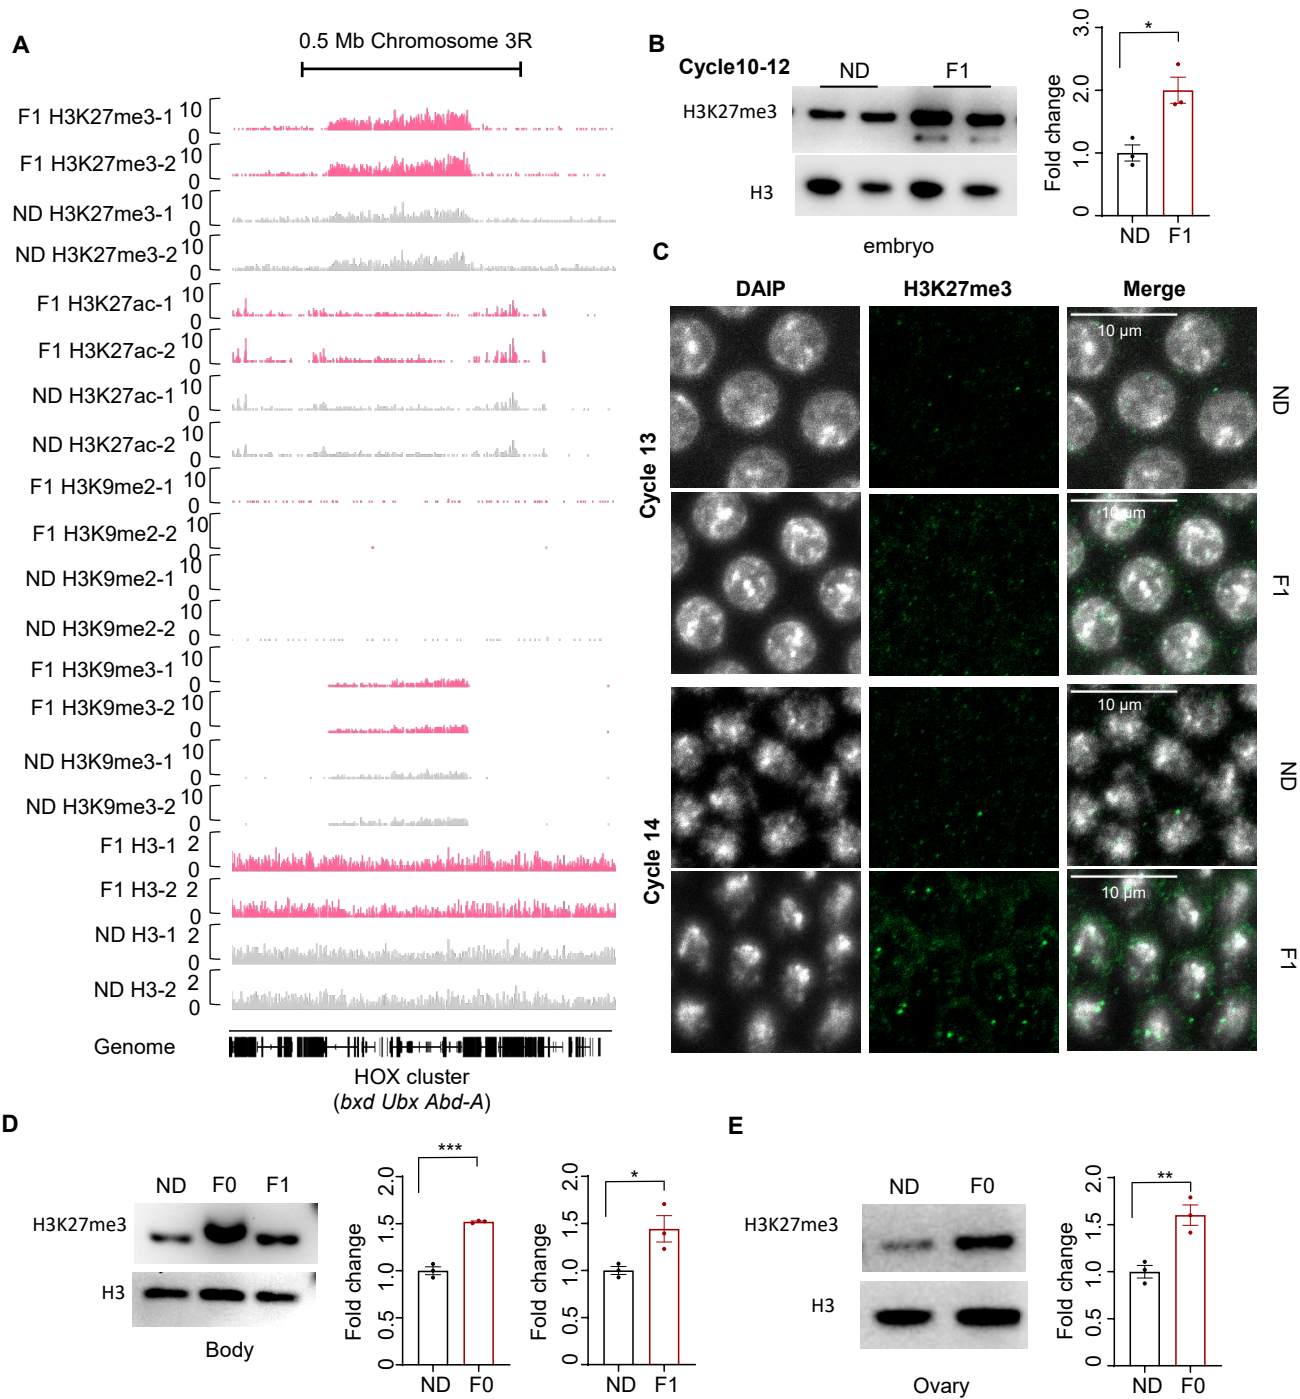

Supplement: supp [file elife-85365-supp-v1.zip]

Figure 5—figure supplement 2

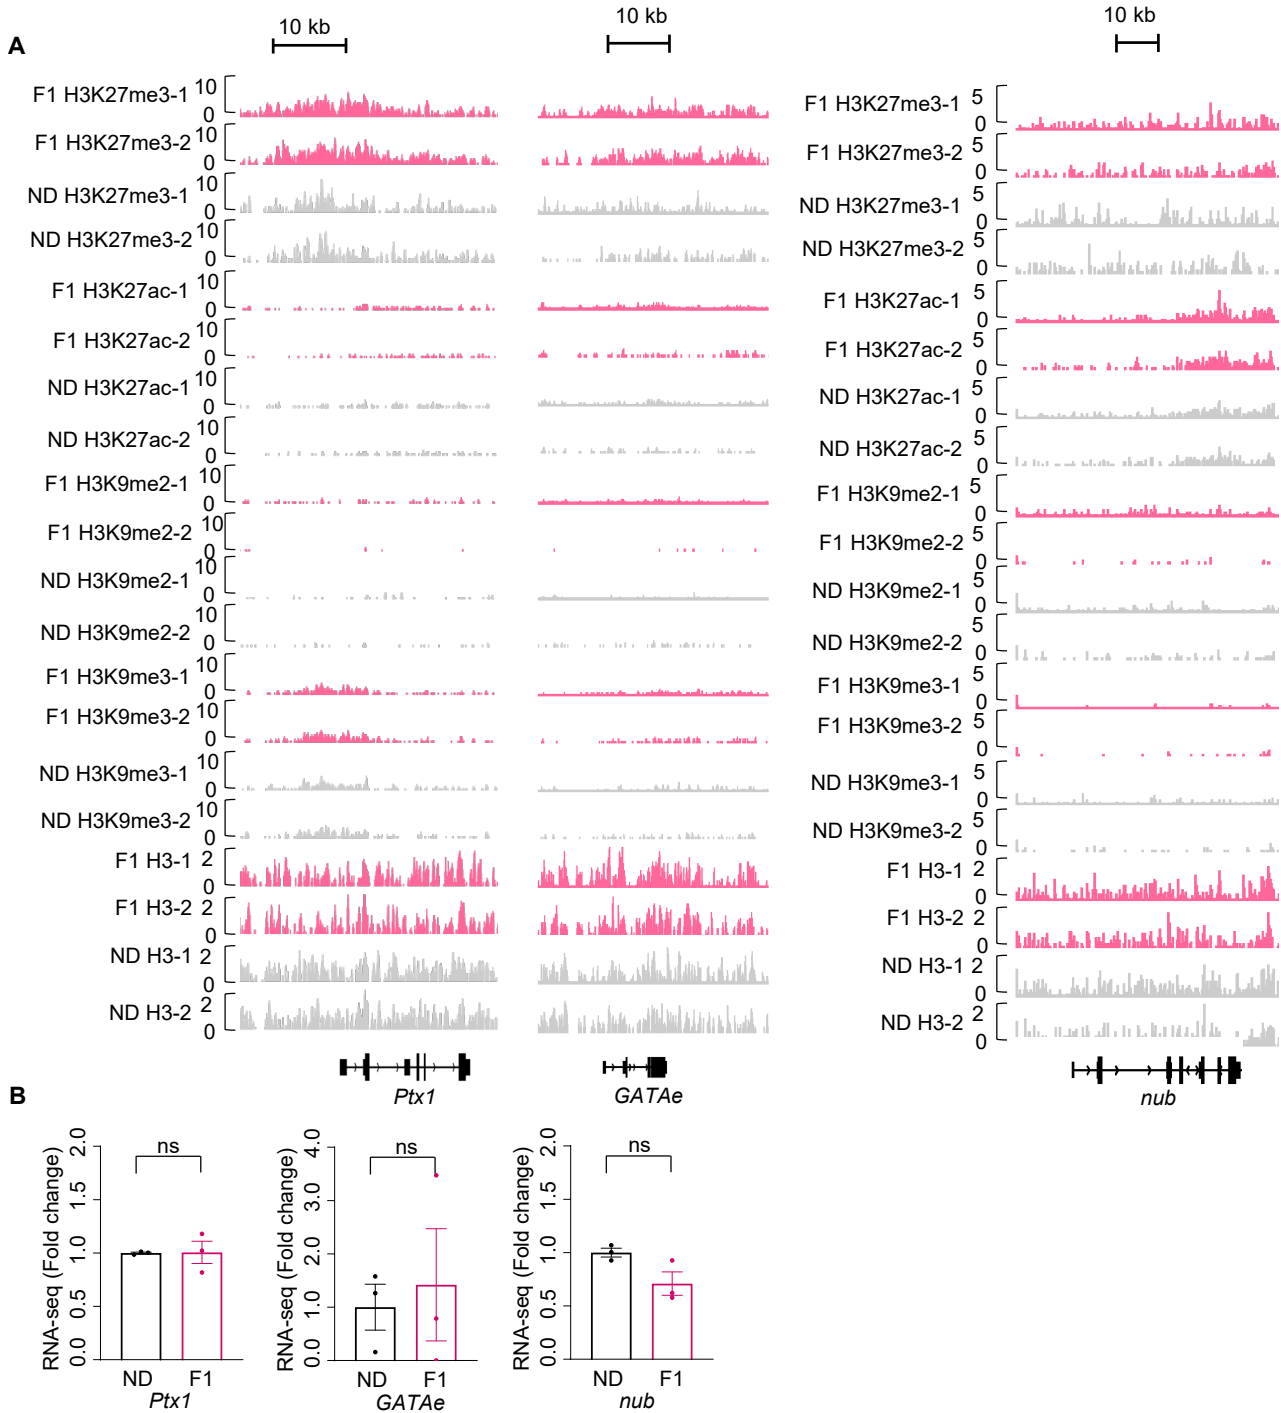

Supplement: supp [file elife-85365-supp-v1.zip]

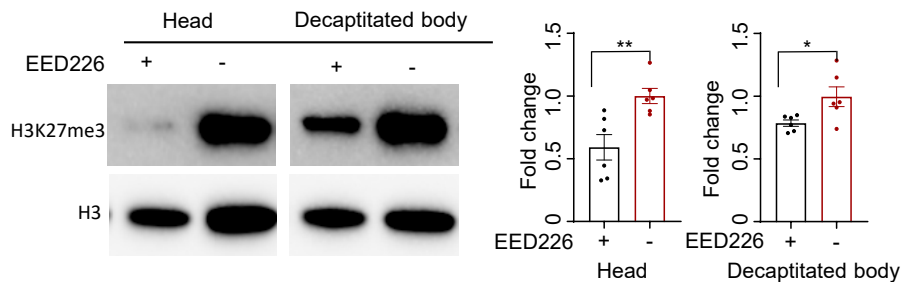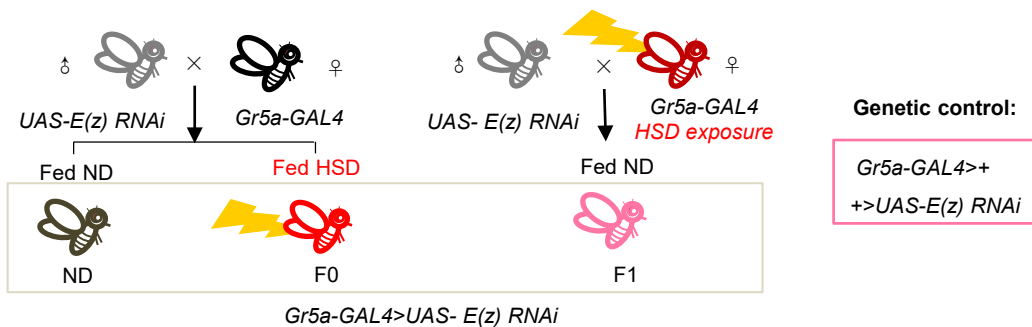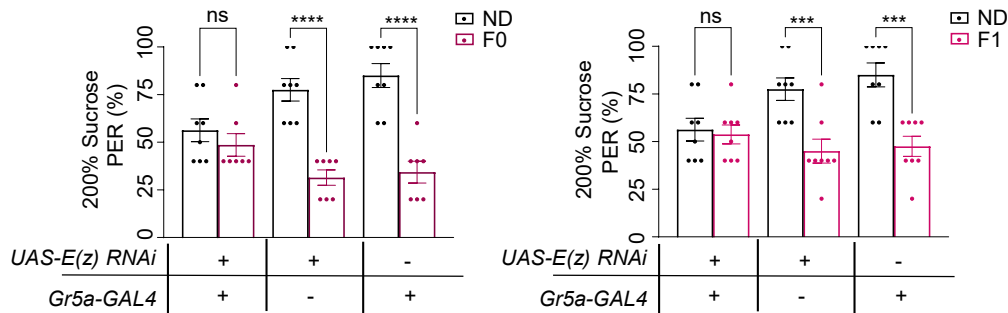

Supplement: supp [file elife-85365-supp-v1.zip]

**Figure 1—figure supplement 2**

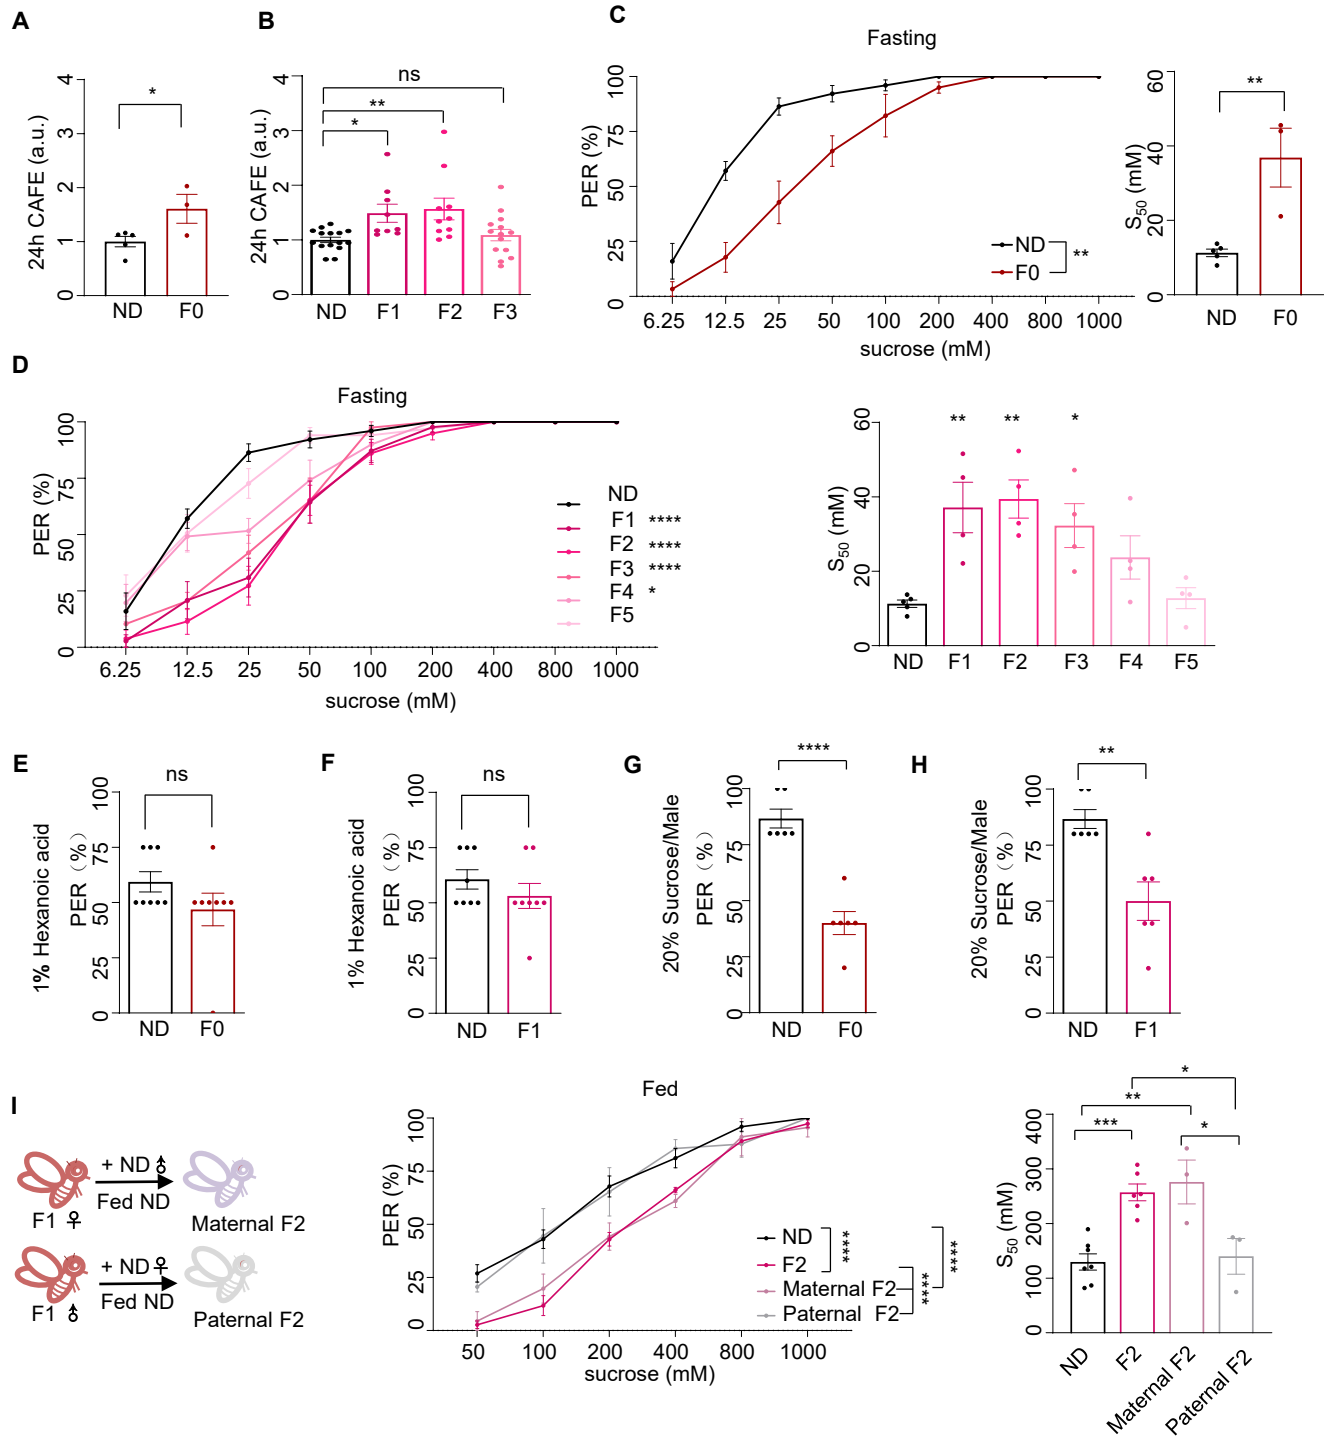

Supplement: supp [file elife-85365-supp-v1.zip]
